# Supplementary material for: Regioselective N-alkylation with alcohols for the preparation of 2-(N-alkylamino)quinazolines and 2-(N-alkylamino)pyrimidines
Source: Royal Society of Chemistry journal article supplement (doi:10.1039/c2nj41021d), 2012-11-30

Electronic Supplementary Information (ESI)

**Regioselective *N*-alkylation with alcohols for the preparation of 2-(*N*-alkylamino)quinazolines and 2-(*N*-alkylamino)pyrimidines†**

Feng Li,\* Lin Chen, Qikai Kang, Jianguang Cai and Guangjun Zhu

*School of Chemical Engineering, Nanjing University of Science and Technology, Nanjing 210094, P. R. China*

N-butylquinazolin-2-amine  
Proton CDCl<sub>3</sub>

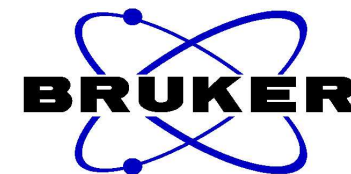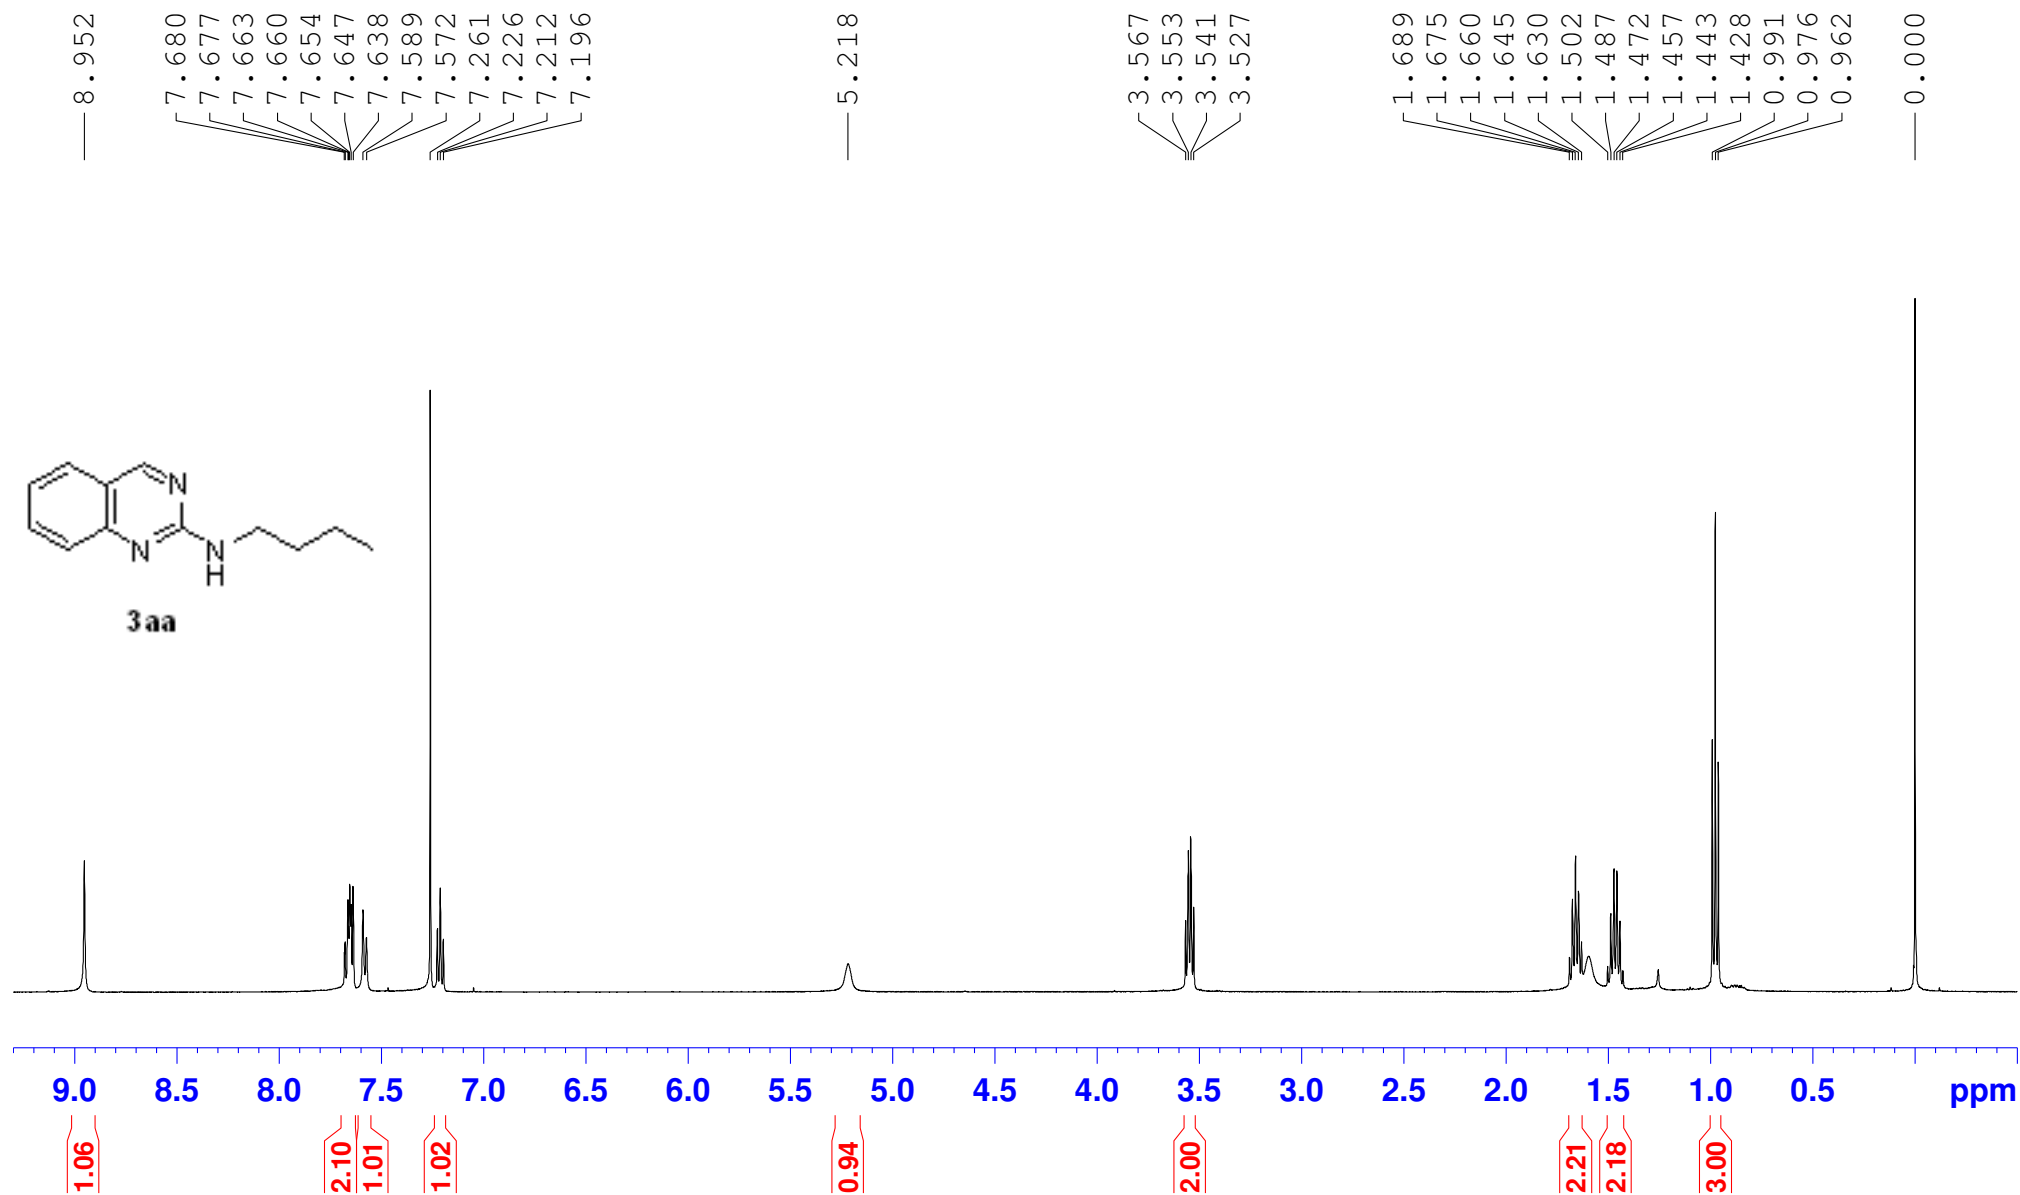

N-butylquinazolin-2-amine  
C13CPD CDC13

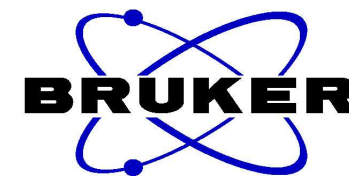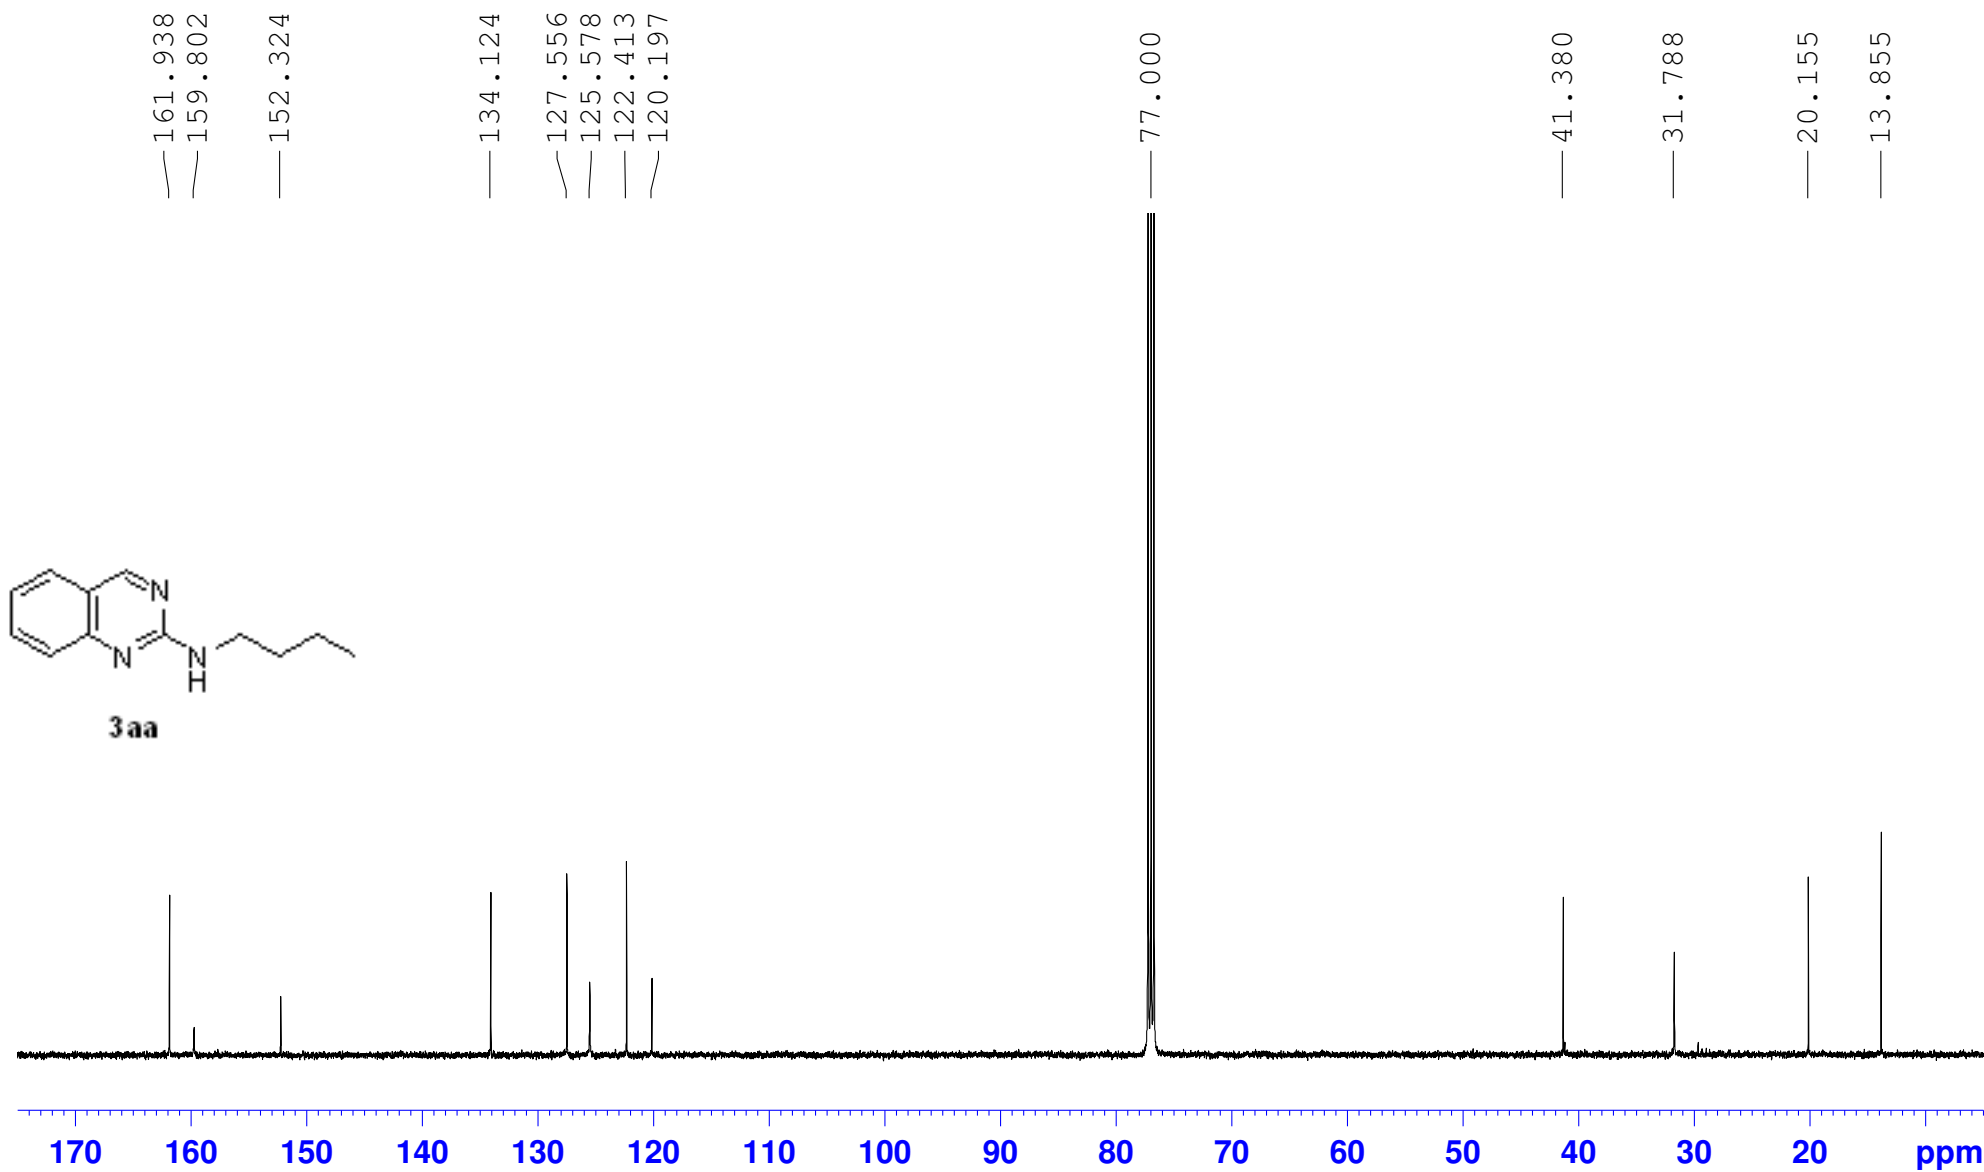

N-hexylquinazolin-2-amine  
Proton CDCl<sub>3</sub>

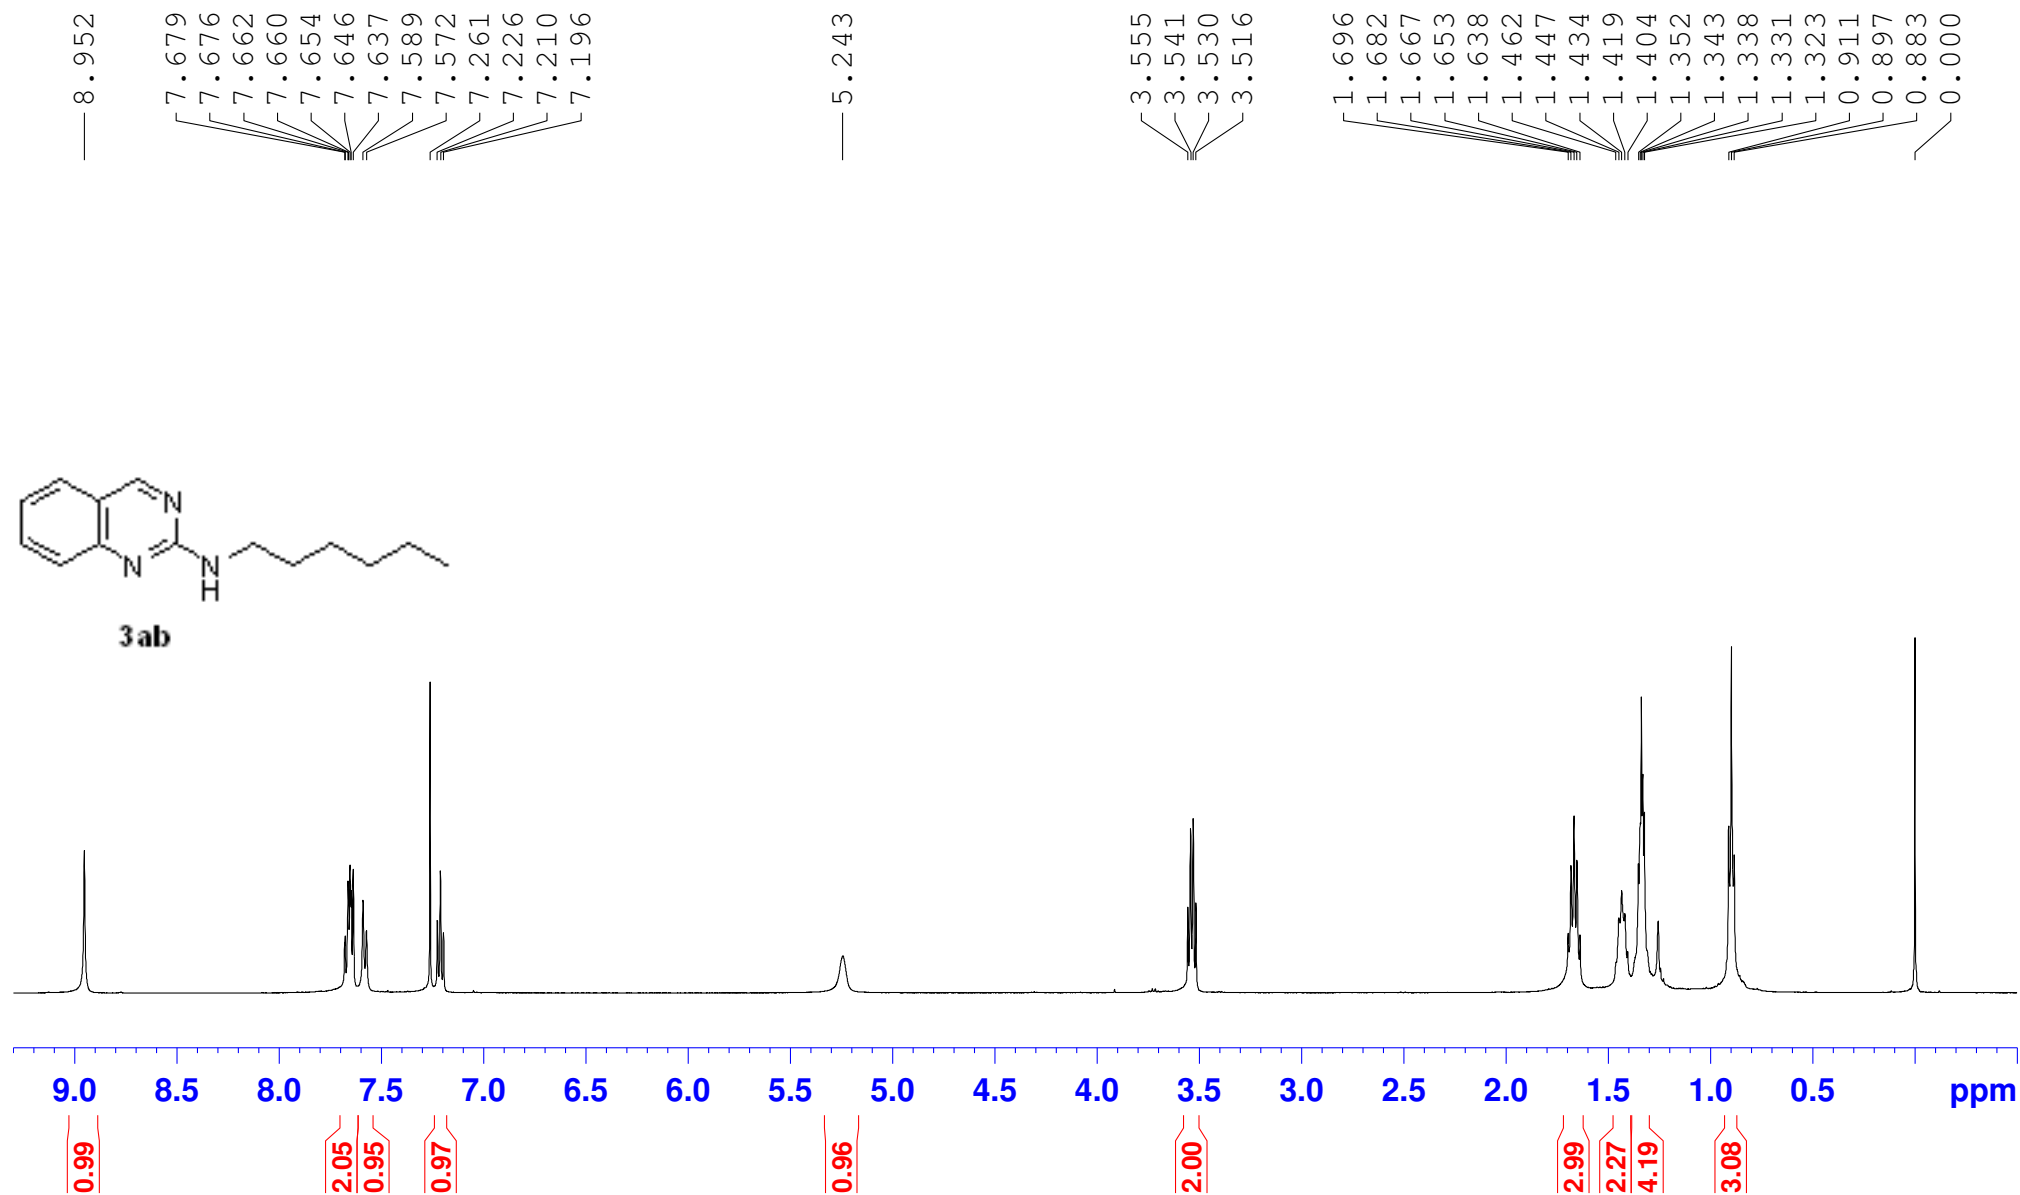

N-hexylquinazolin-2-amine  
C13CPD CDC13



161.860  
159.719

152.258

134.158

127.526

125.523

122.345

120.134

77.000

41.626

31.573

29.587

26.667

22.574

13.996

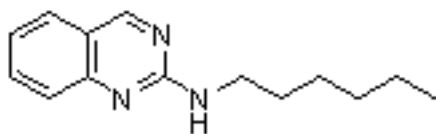

**3ab**

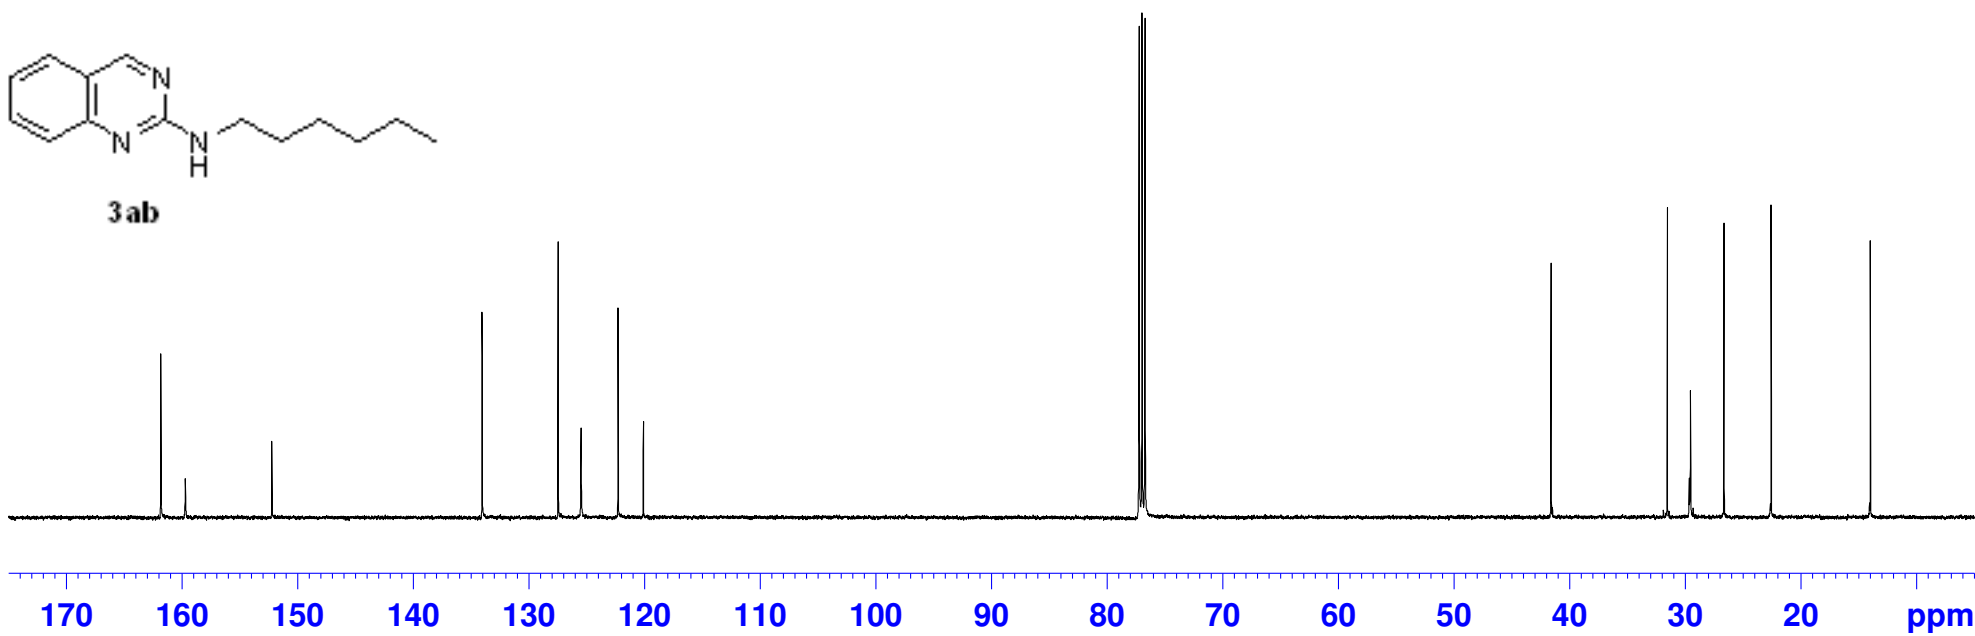

N-octylquinazolin-2-amine  
Proton CDCl<sub>3</sub>

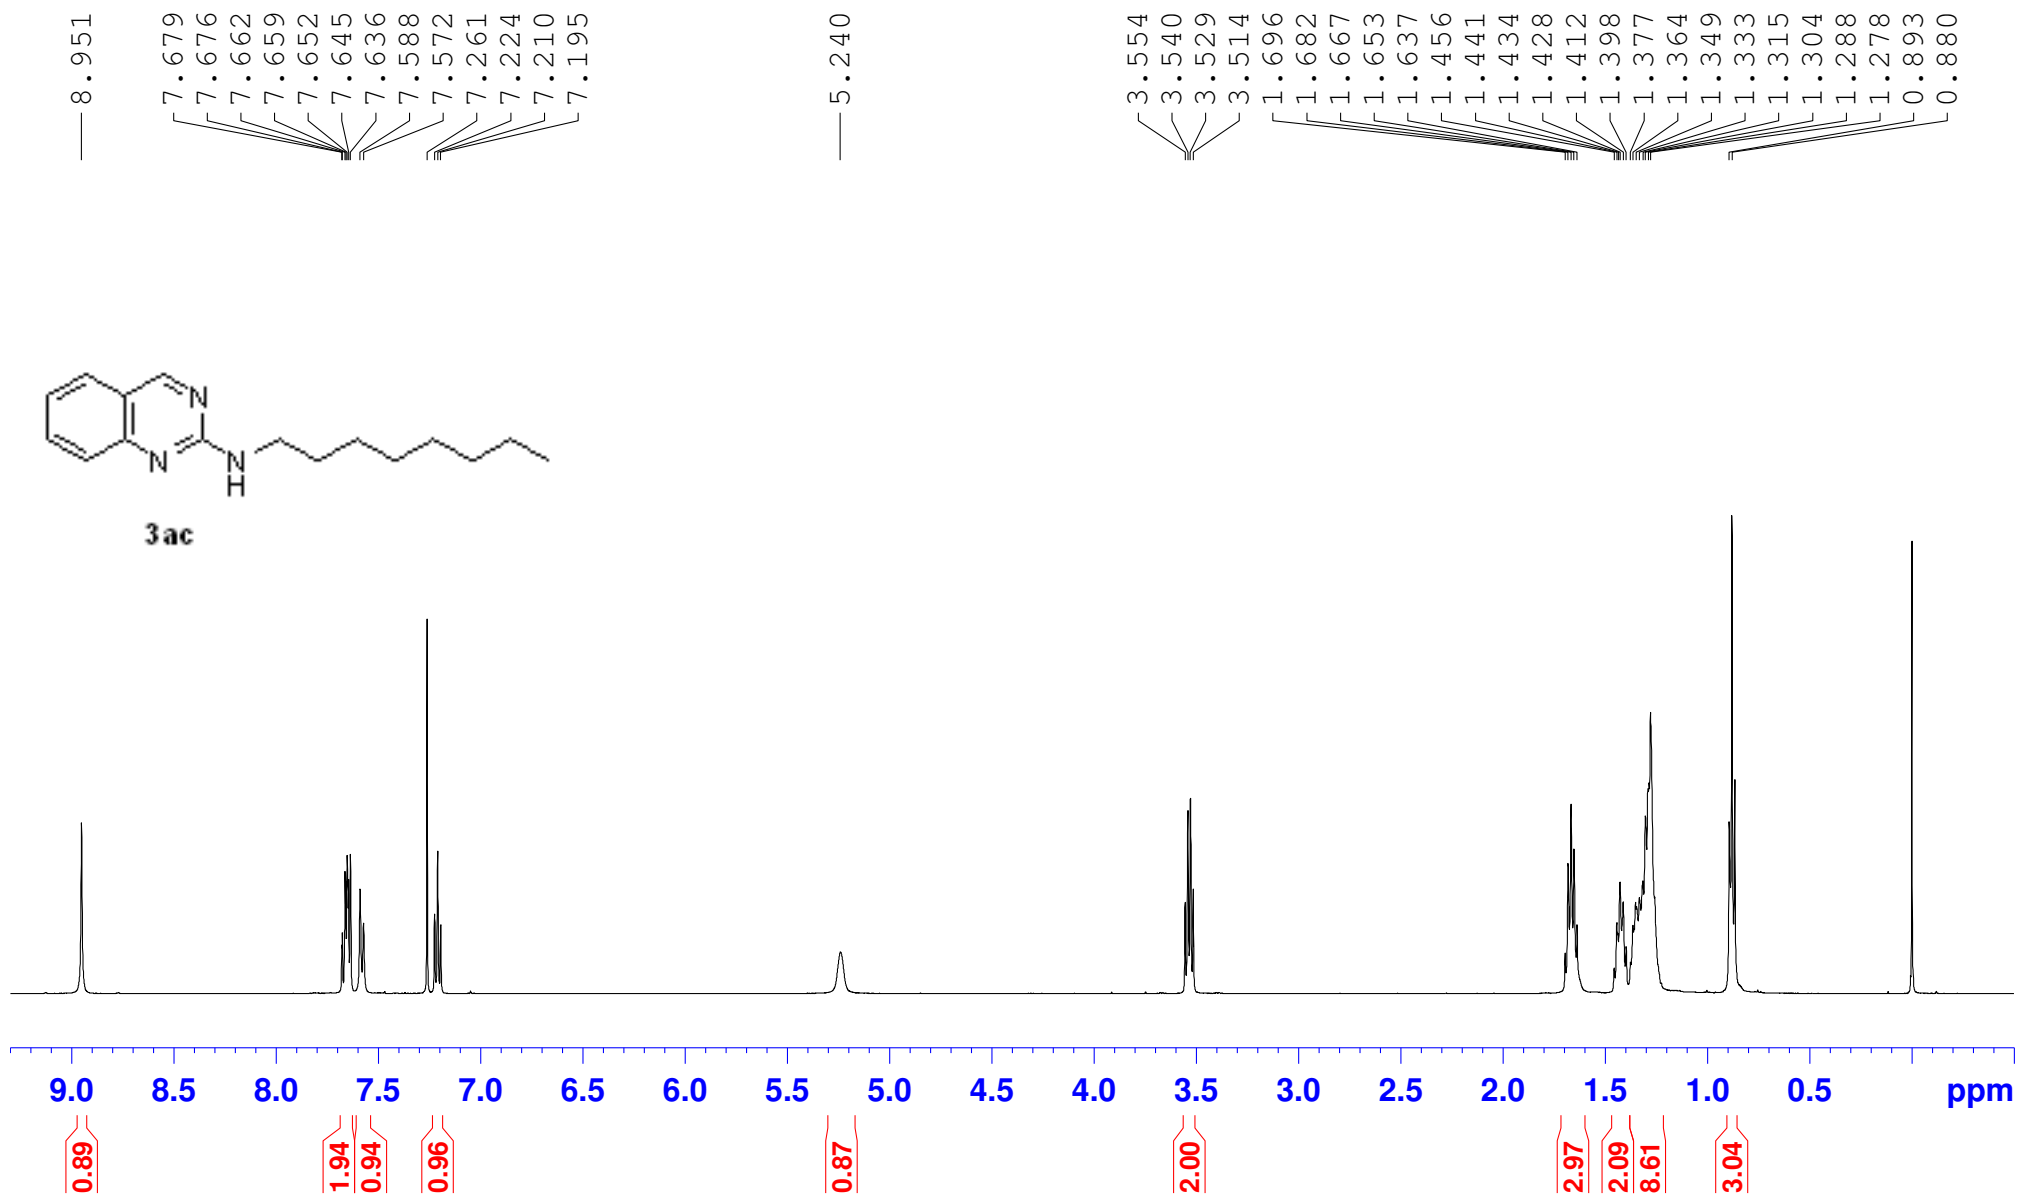

N-octylquinazolin-2-amine  
C13CPD CDC13



161.867  
159.772

152.277

134.074

127.510

125.508

122.343

120.155

77.000

41.627

31.807

29.615

29.339

29.235

27.009

22.625

14.083

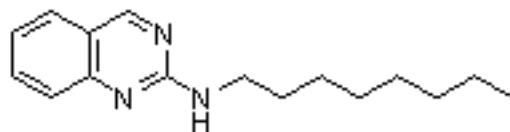

3ac

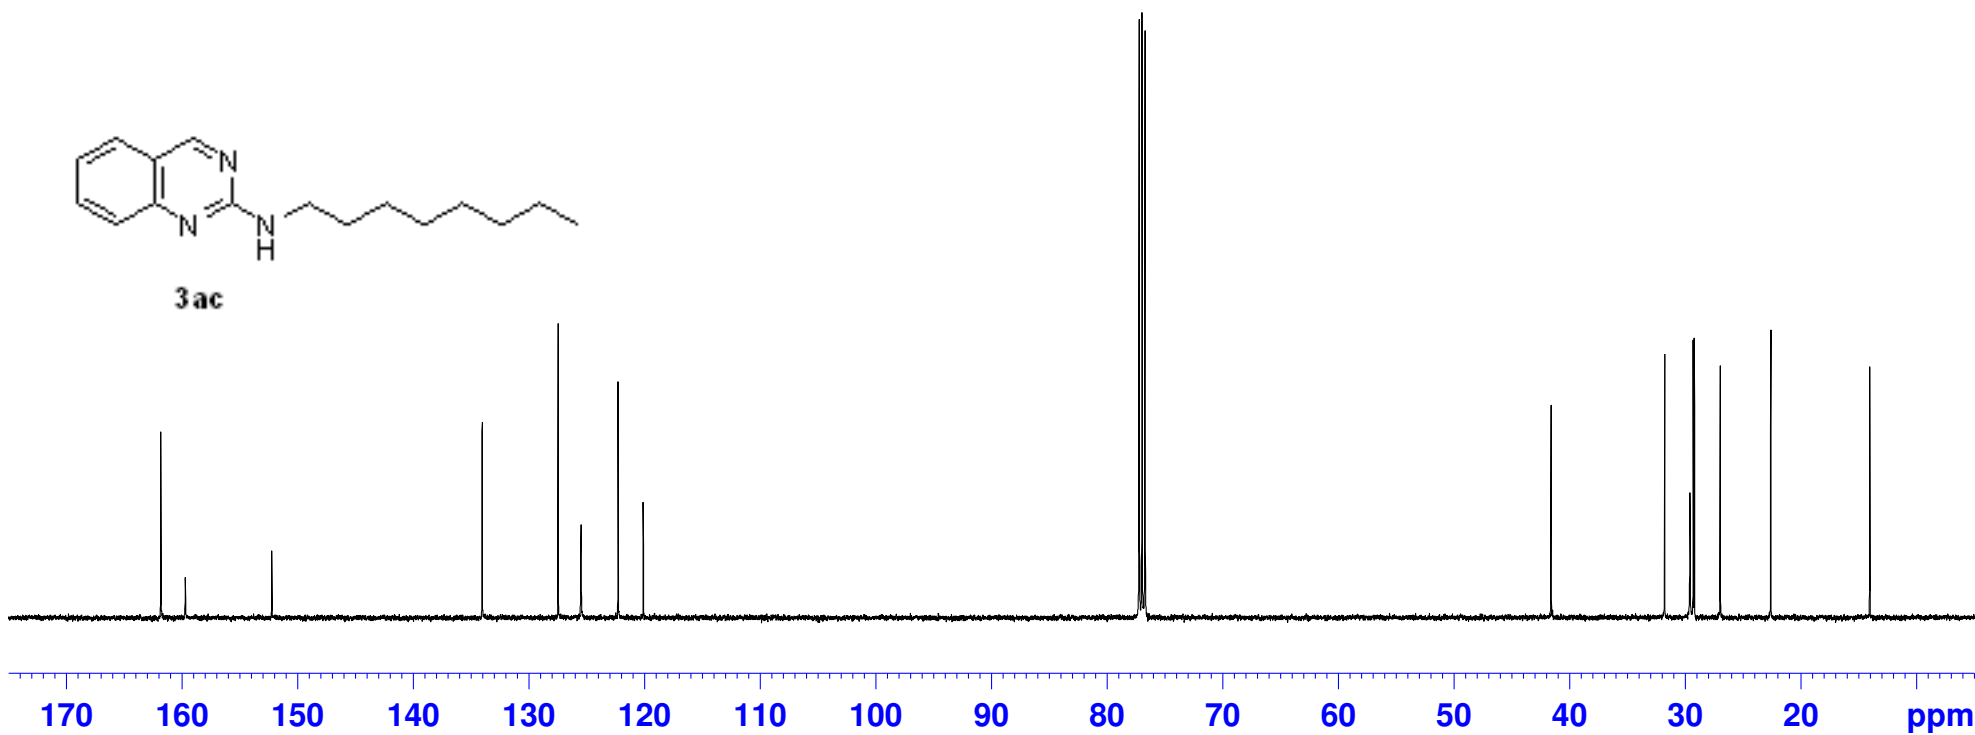

N-ethylquinazolin-2-amine  
Proton CDCl<sub>3</sub>

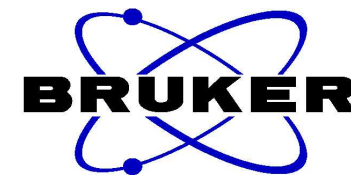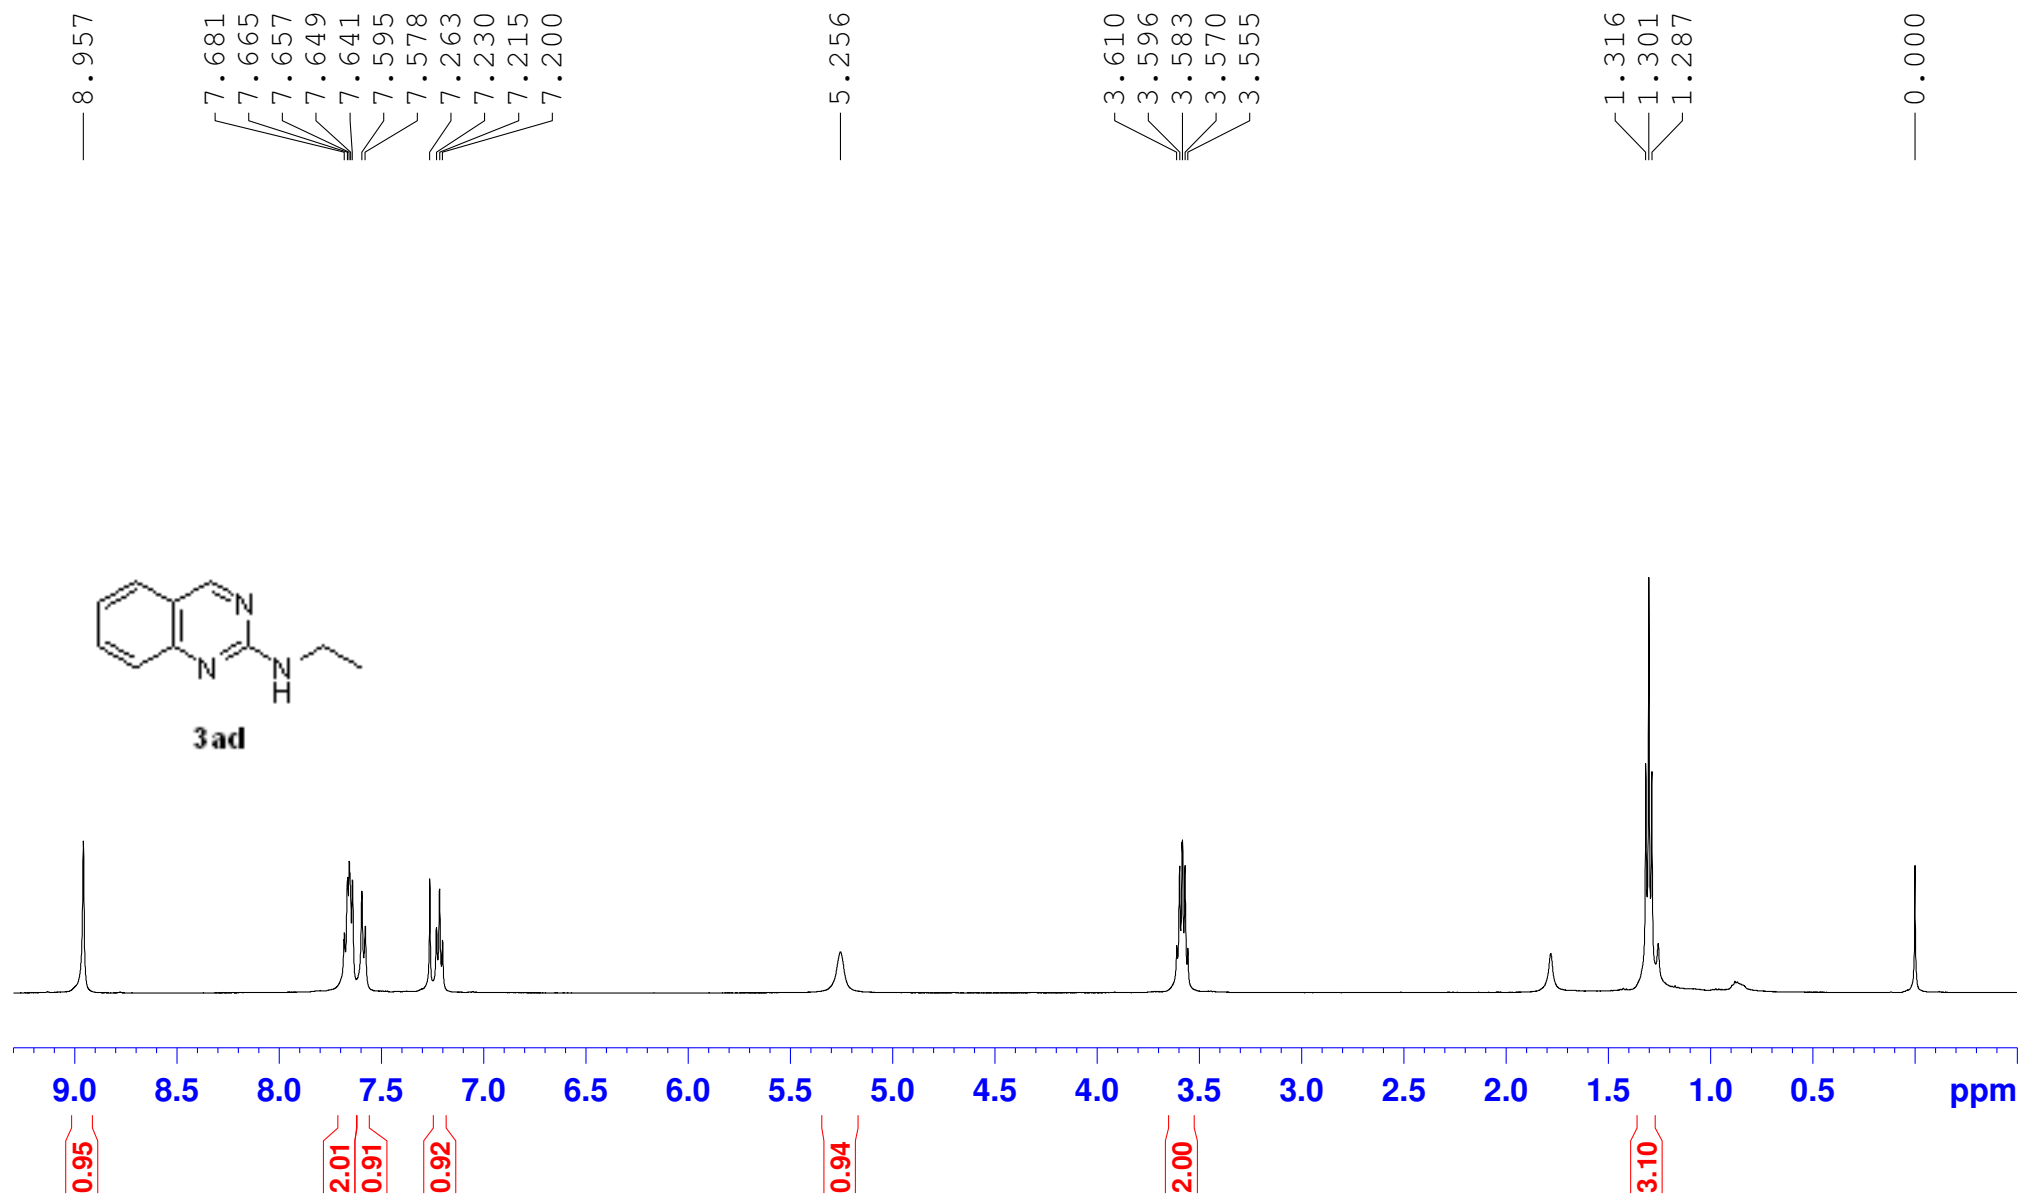



N-ethylquinazolin-2-amine  
C13CPD CDC13

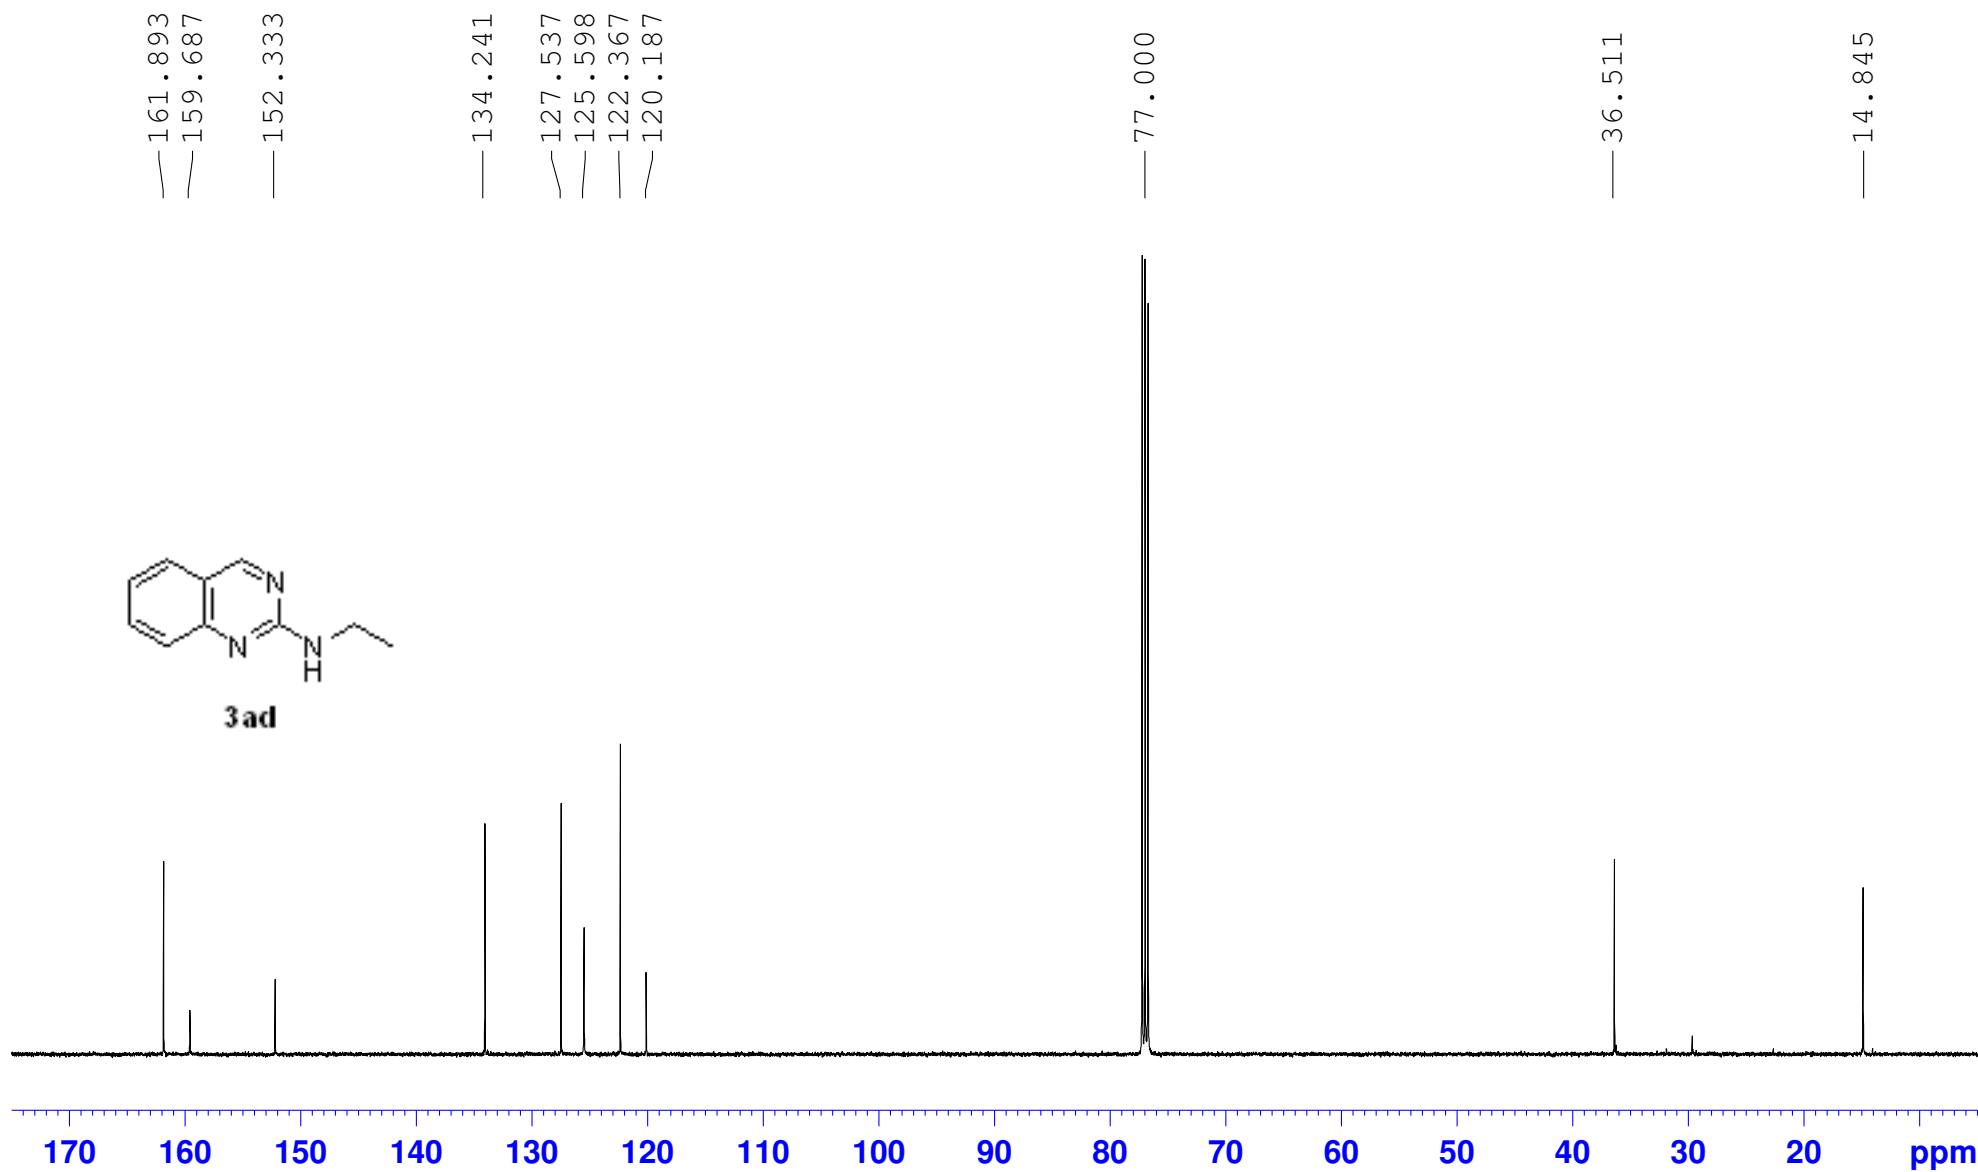

N-isopentylquinazolin-2-amine  
Proton CDCl<sub>3</sub>

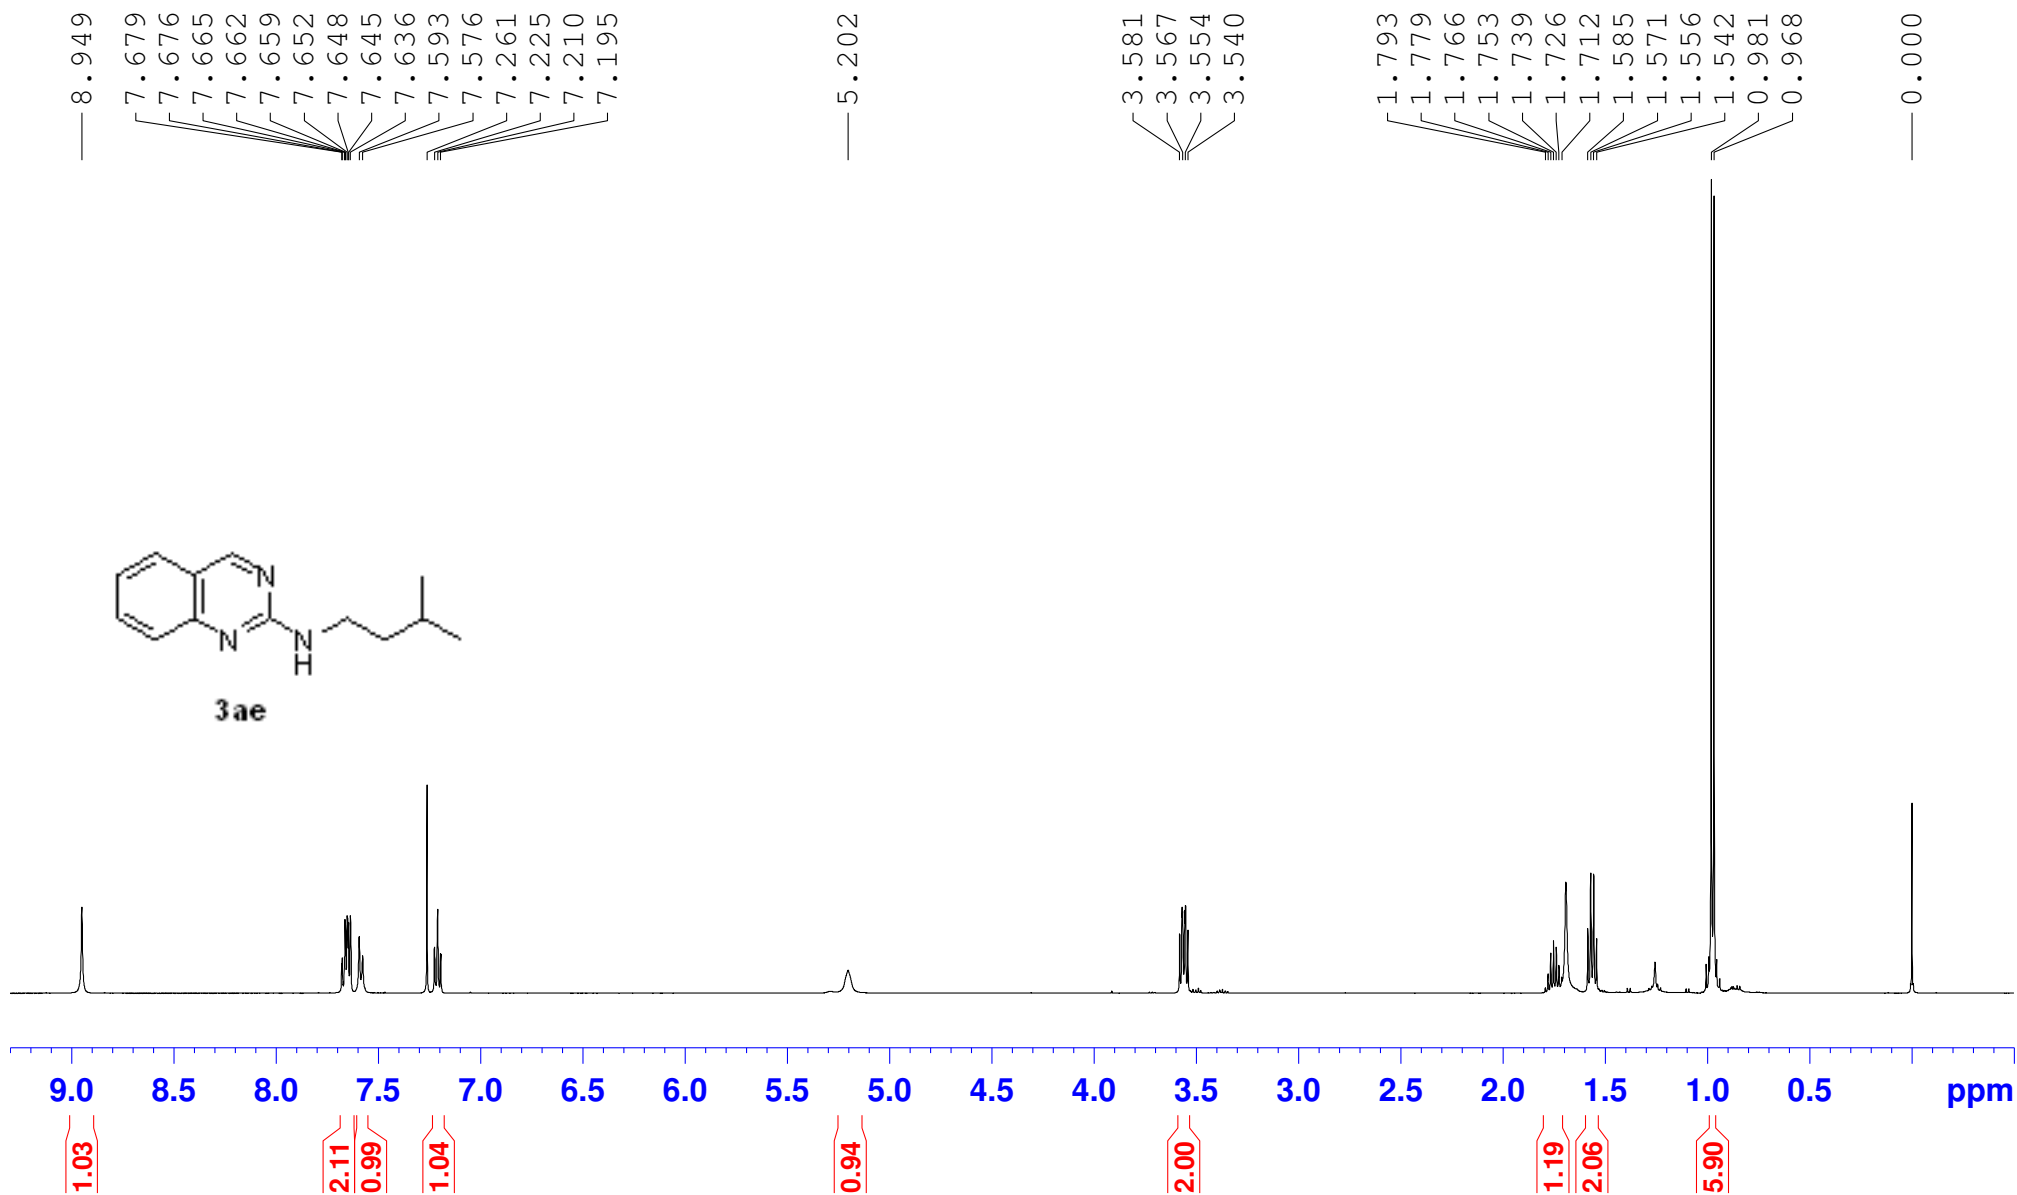

N-isopentylquinazolin-2-amine  
C13CPD CDC13



161.868  
159.755

152.276

134.108

127.517  
125.531  
122.320  
120.123

77.000

39.858  
38.598

25.847  
22.561

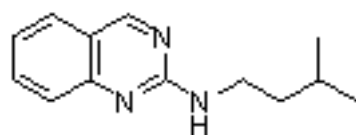

3ae

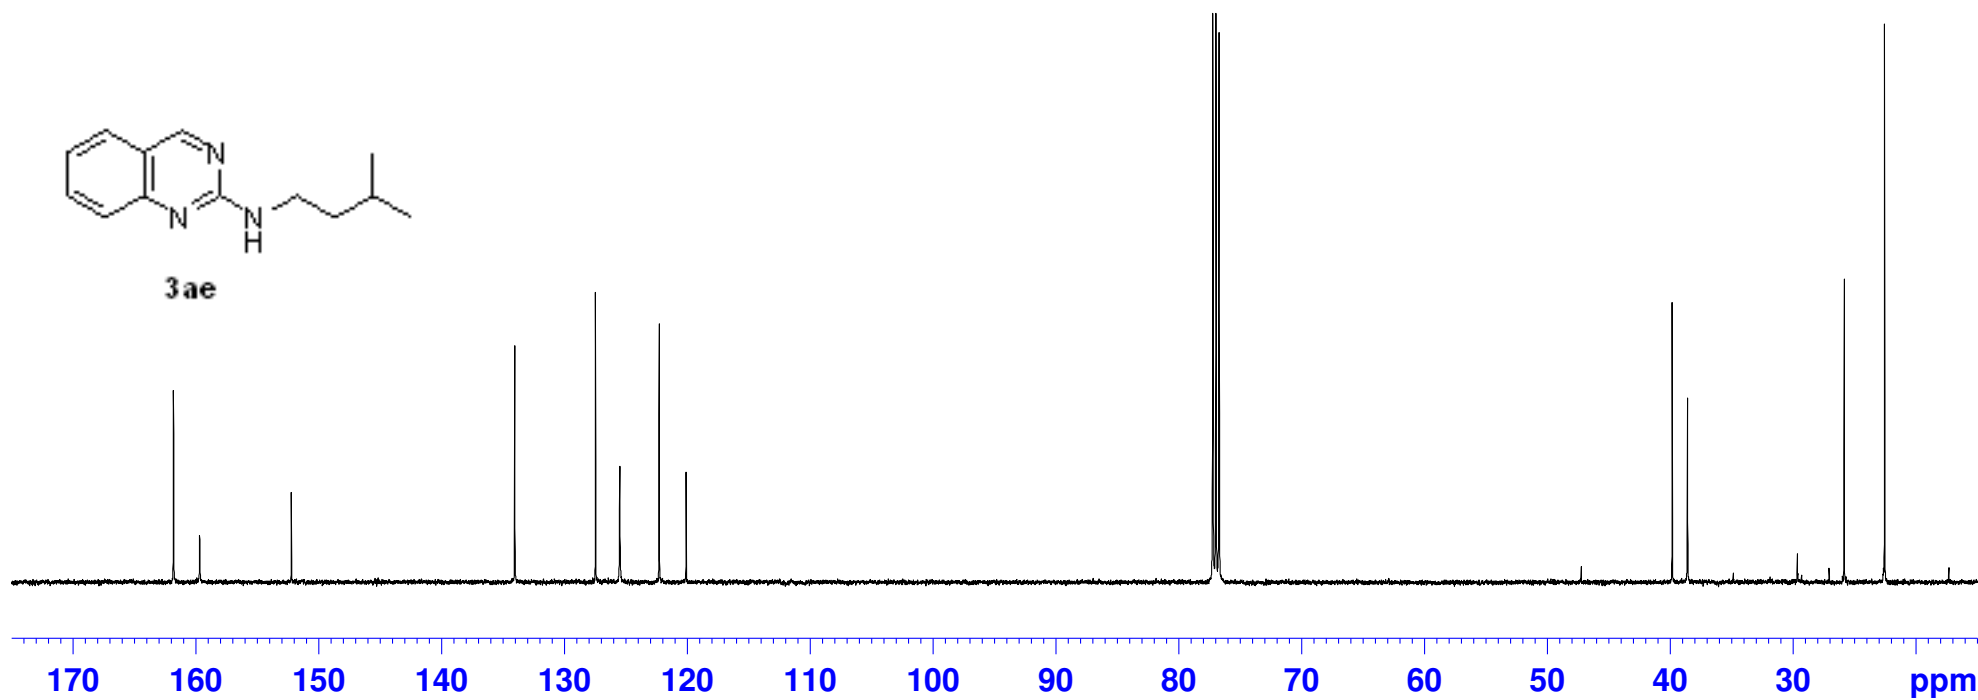

N-(2-ethylhexyl)quinazolin-2-amine  
Proton CDCl<sub>3</sub>

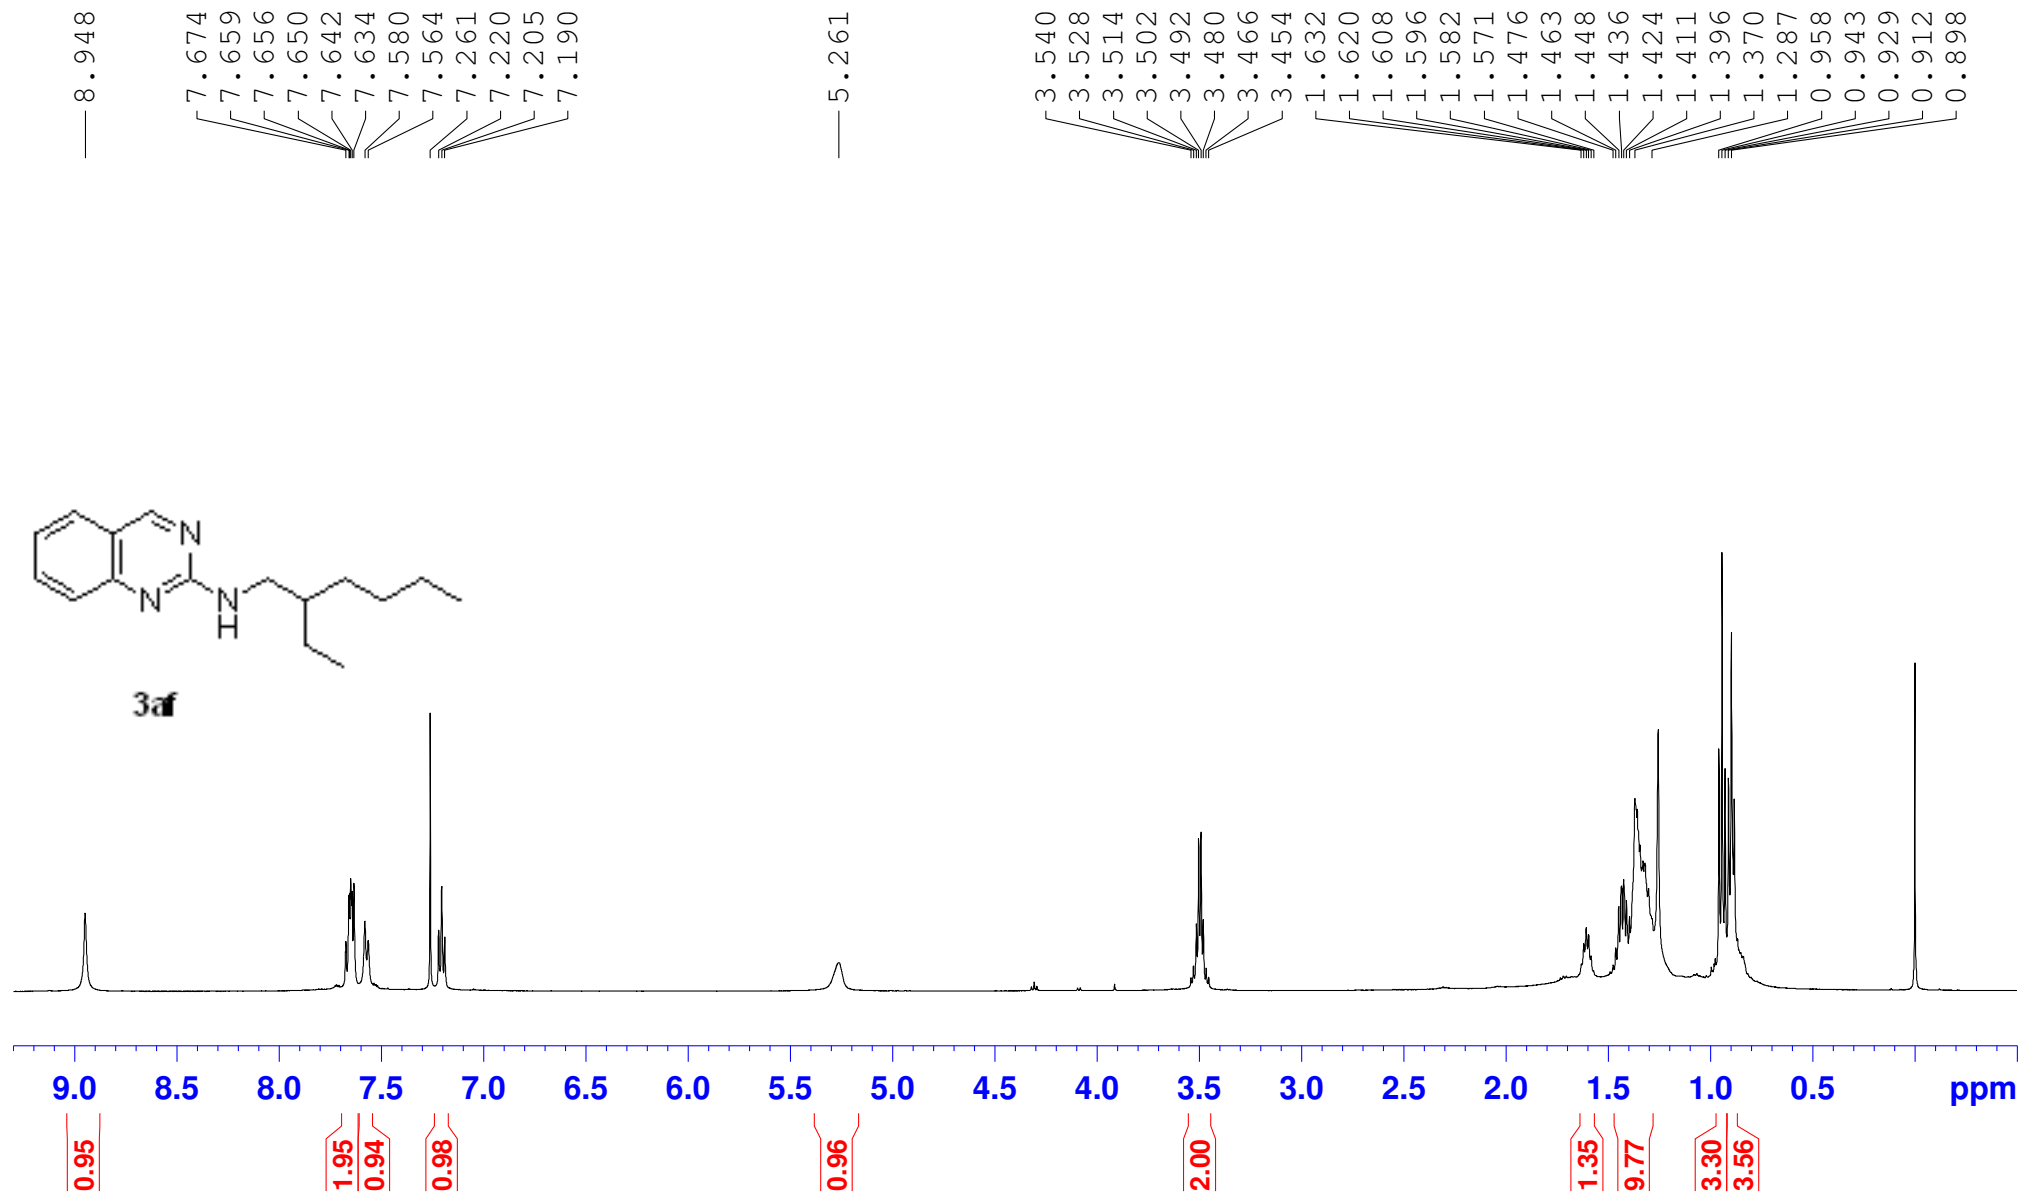

N-(2-ethylhexyl)quinazolin-2-amine  
C13CPD CDCl<sub>3</sub>



161.904  
159.931

152.224

134.098

127.501

125.466

122.260

120.102

77.000

44.343

39.468

31.177

29.003

24.438

23.072

14.067

10.993

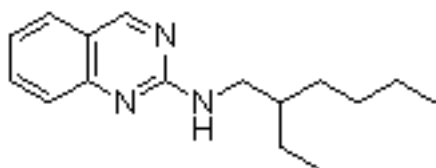

3af

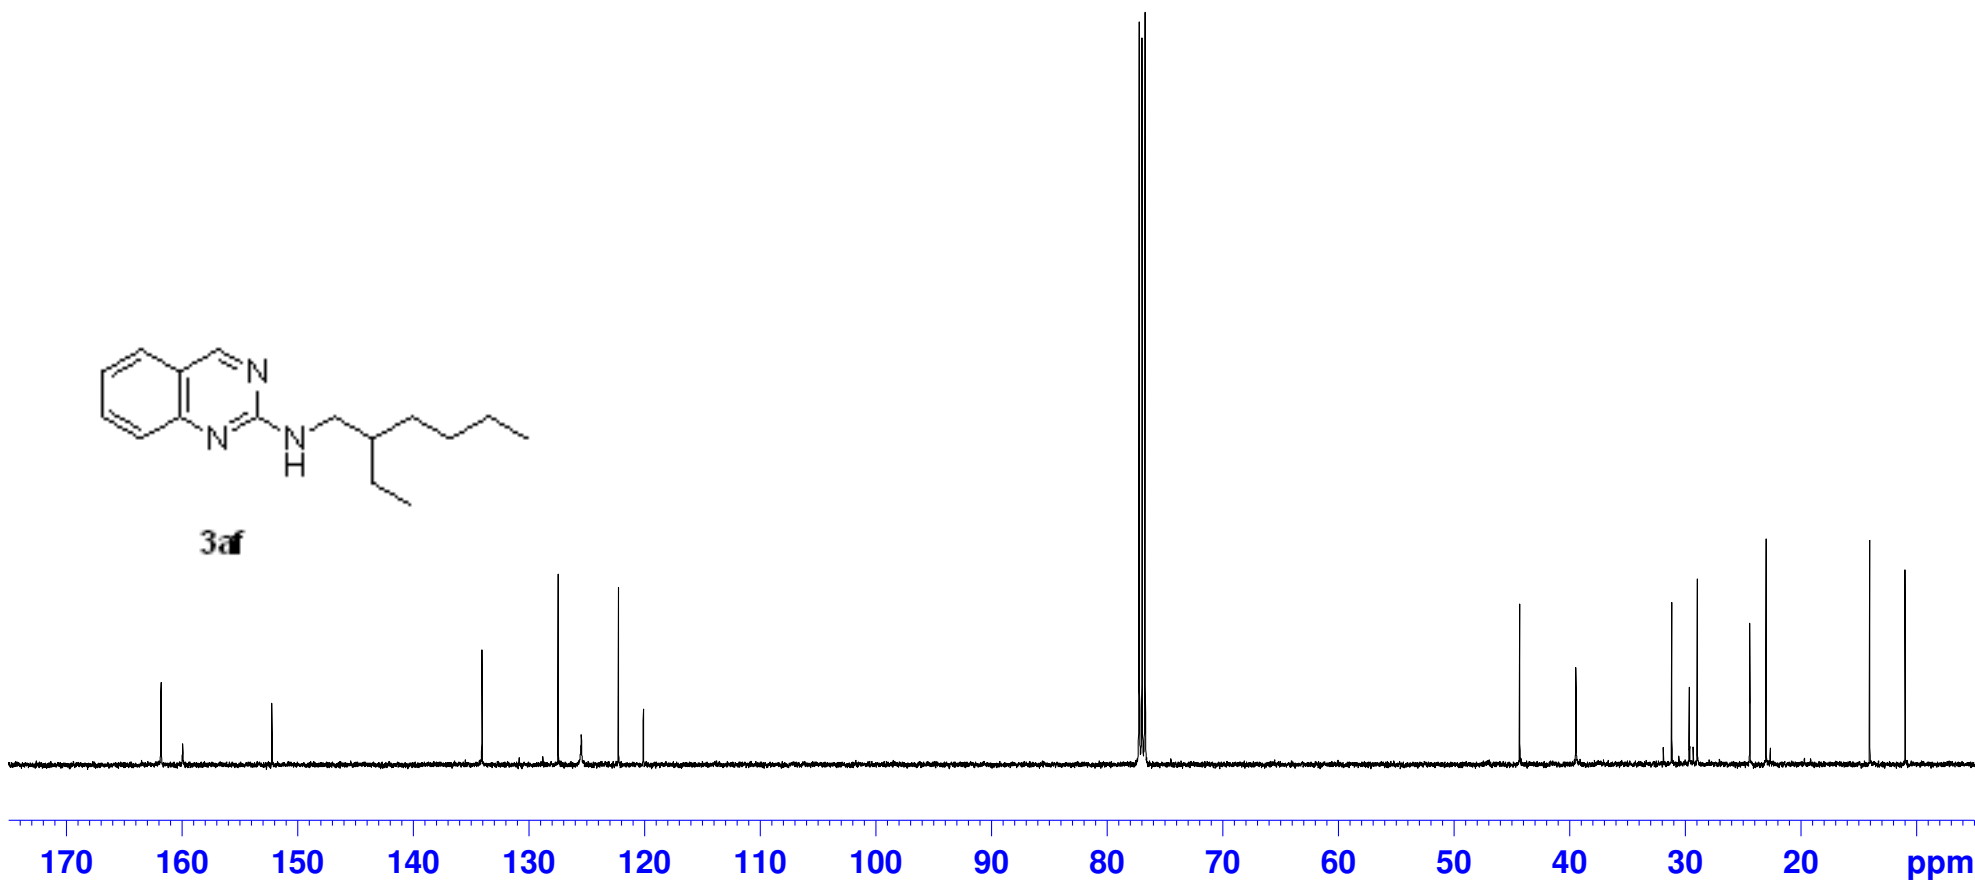

N-(2-methylbutyl)quinazolin-2-amine  
Proton CDCl<sub>3</sub>

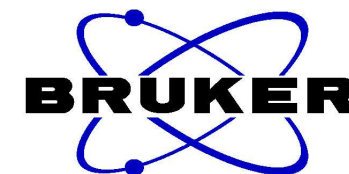

— 8.949  
7.673  
7.649  
7.634  
7.584  
7.567  
7.263  
7.220  
7.205  
7.191  
— 5.312  
3.528  
3.516  
3.503  
3.490  
3.478  
3.396  
3.385  
3.371  
3.358  
3.346  
1.795  
1.771  
1.756  
1.742  
1.730  
1.716  
1.701  
1.571  
1.558  
1.543  
1.531  
1.516  
1.503  
1.488  
1.301  
1.286  
1.271  
1.256  
1.243  
1.229  
1.214  
1.006

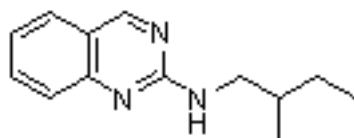

3ag

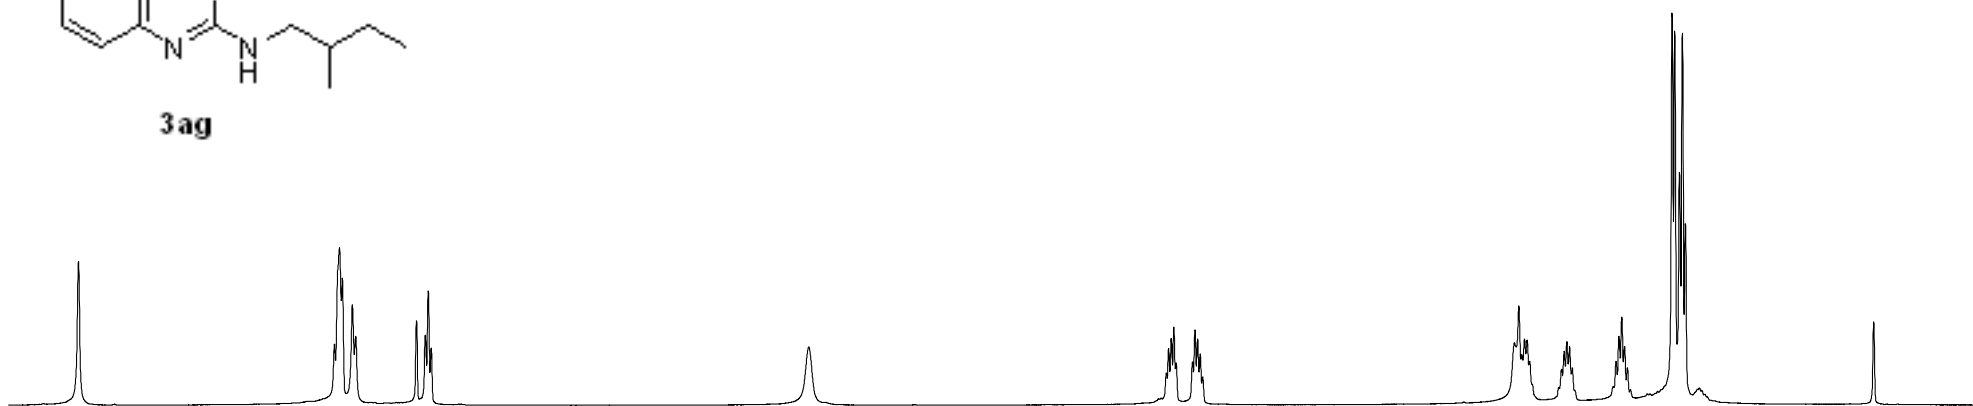

9.0 8.5 8.0 7.5 7.0 6.5 6.0 5.5 5.0 4.5 4.0 3.5 3.0 2.5 2.0 1.5 1.0 0.5 ppm  
0.86 1.92 0.95 0.92 0.97 1.00 0.97 2.11 1.12 1.29 2.82 2.88

N-(2-methylbutyl)quinazolin-2-amine  
C13CPD CDC13

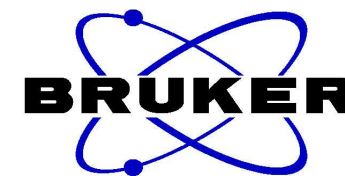

161.925  
159.941  
152.223  
134.068  
127.526  
125.468  
122.381  
120.103  
77.000  
47.342  
34.928  
27.353  
17.464  
11.572

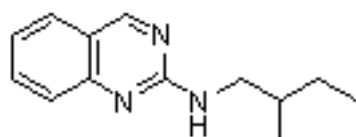

3ag

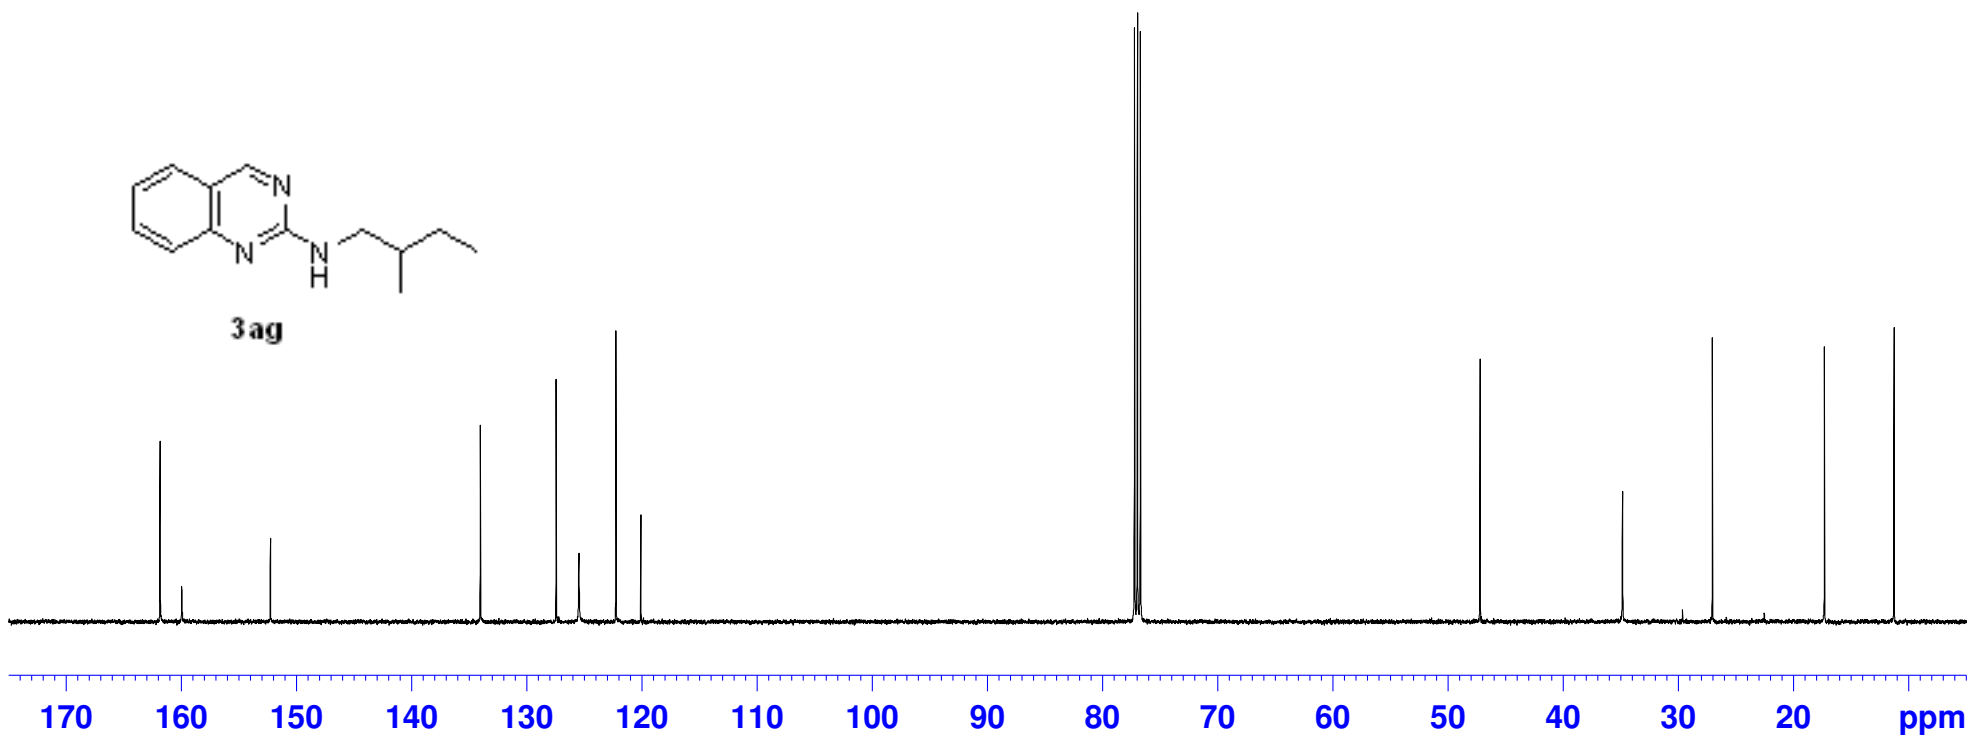

N-(cyclohexylmethyl)quinazolin-2-amine  
Proton CDCl<sub>3</sub>

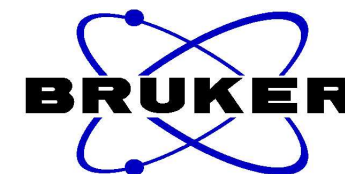

8.944  
7.670  
7.655  
7.647  
7.640  
7.630  
7.580  
7.563  
7.261  
7.216  
7.202  
7.184  
5.351  
5.304  
3.419  
3.406  
3.394  
1.857  
1.831  
1.757  
1.735  
1.679  
1.611  
1.301  
1.276  
1.251  
1.224  
1.196  
1.172  
1.076  
1.051  
1.027  
1.004  
0.000

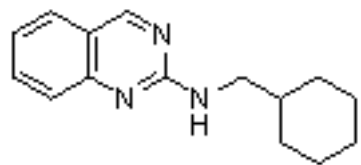

3ah

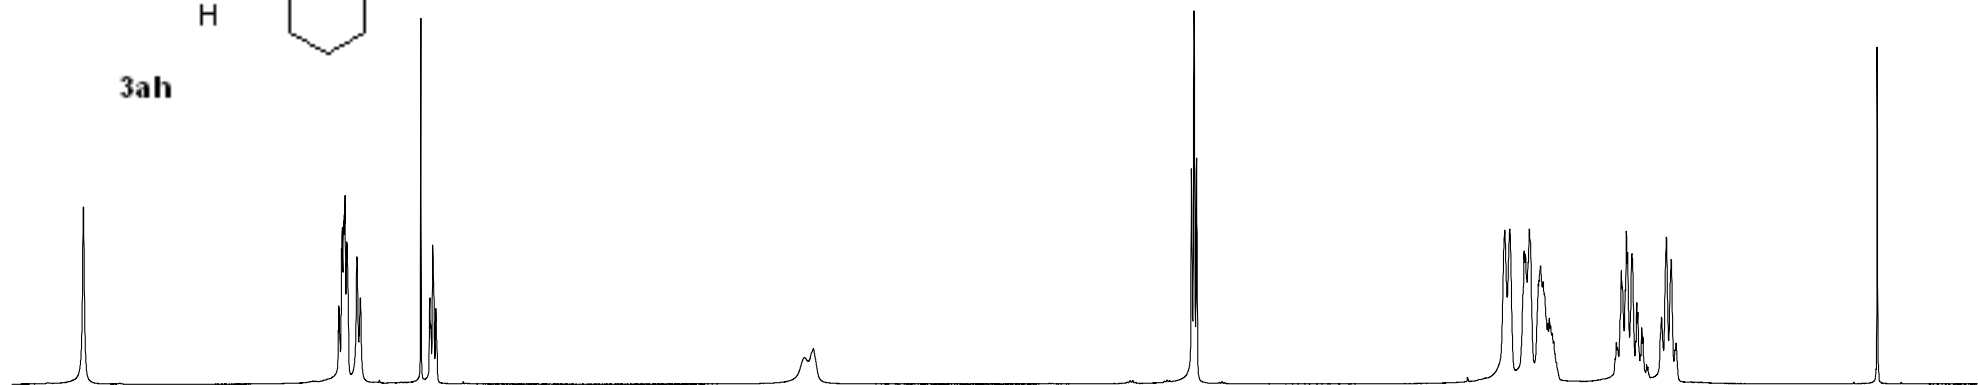

9.0 8.5 8.0 7.5 7.0 6.5 6.0 5.5 5.0 4.5 4.0 3.5 3.0 2.5 2.0 1.5 1.0 0.5 ppm  
1.06  
2.06  
0.92  
0.98  
1.09  
2.00  
2.42  
2.36  
2.60  
3.49  
2.16



N-(cyclohexylmethyl)quinazolin-2-amine  
C13CPD CDC13

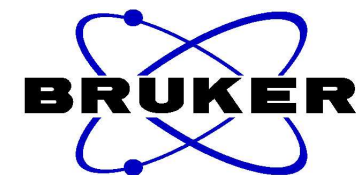

161.807  
159.958

152.272

134.024

127.466  
125.500  
122.241  
120.116

77.000

47.860

37.992  
30.985  
26.499  
25.907

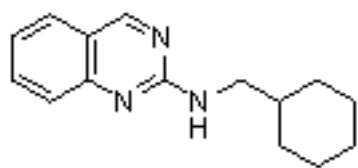

3ah

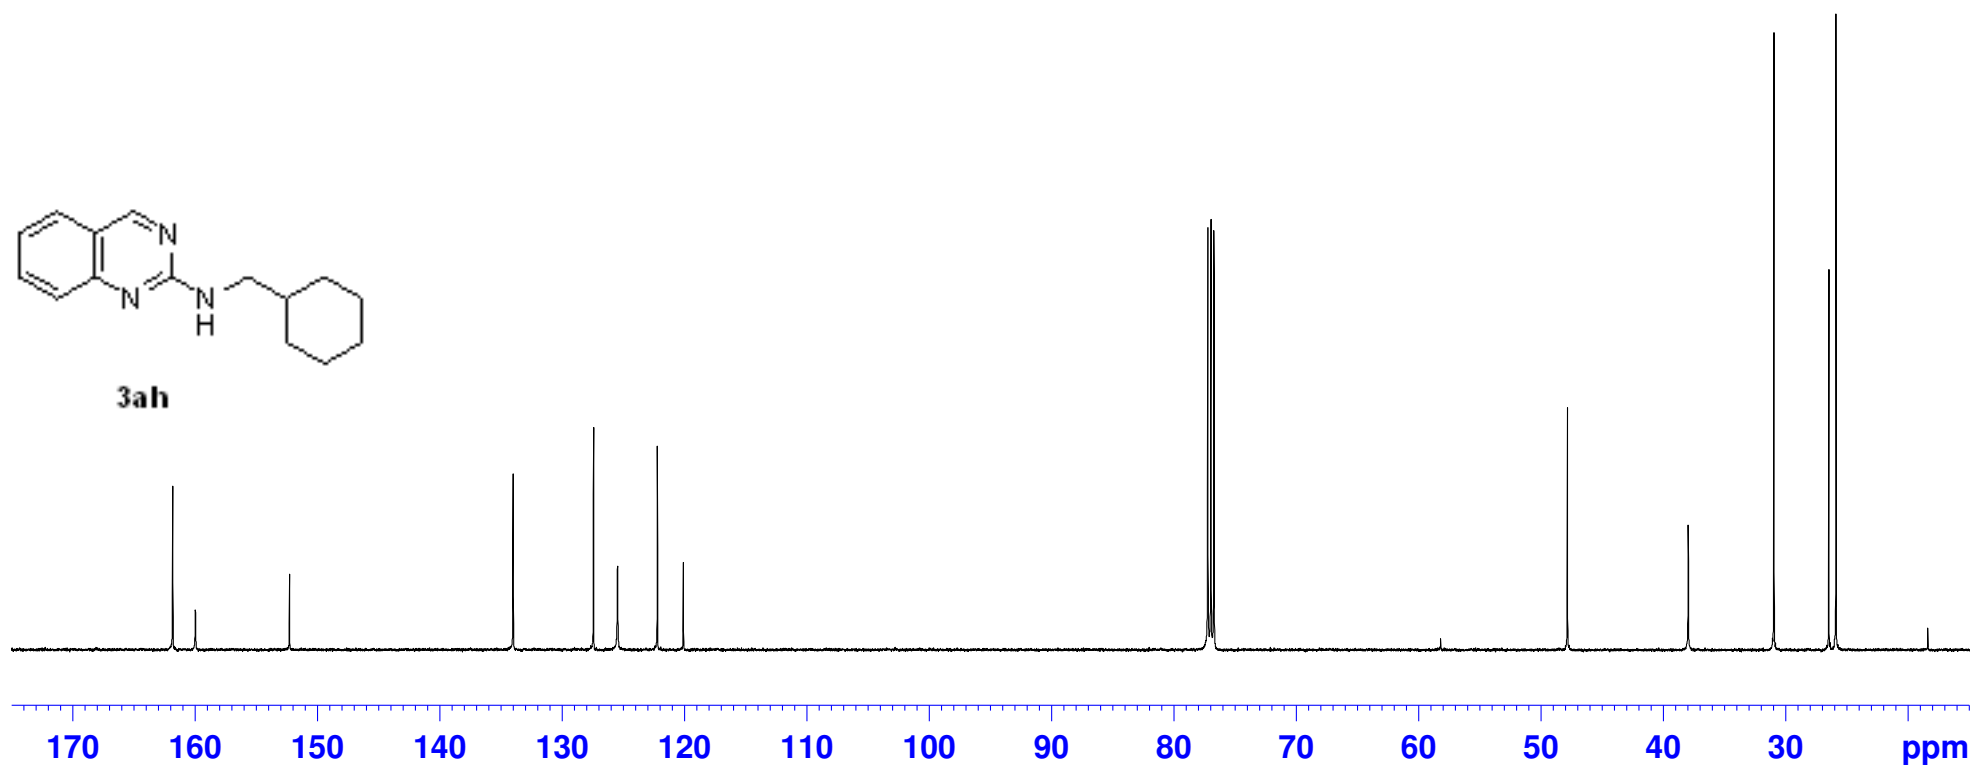

N-cyclohexylquinazolin-2-amine  
Proton CDCl<sub>3</sub>

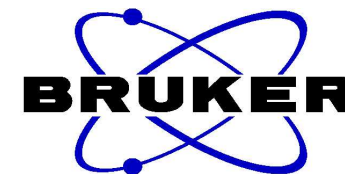

8.944  
7.662  
7.648  
7.635  
7.621  
7.564  
7.547  
7.262  
7.208  
7.193  
7.178  
5.202  
4.040  
4.032  
4.011  
4.003  
3.995  
3.975  
3.967  
2.124  
2.092  
1.790  
1.783  
1.774  
1.763  
1.755  
1.748  
1.677  
1.670  
1.662  
1.652  
1.644  
1.636  
1.510  
1.503  
1.496  
1.480  
1.454  
1.437  
1.430  
1.423  
1.312  
1.305  
1.285

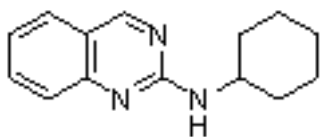

3ai

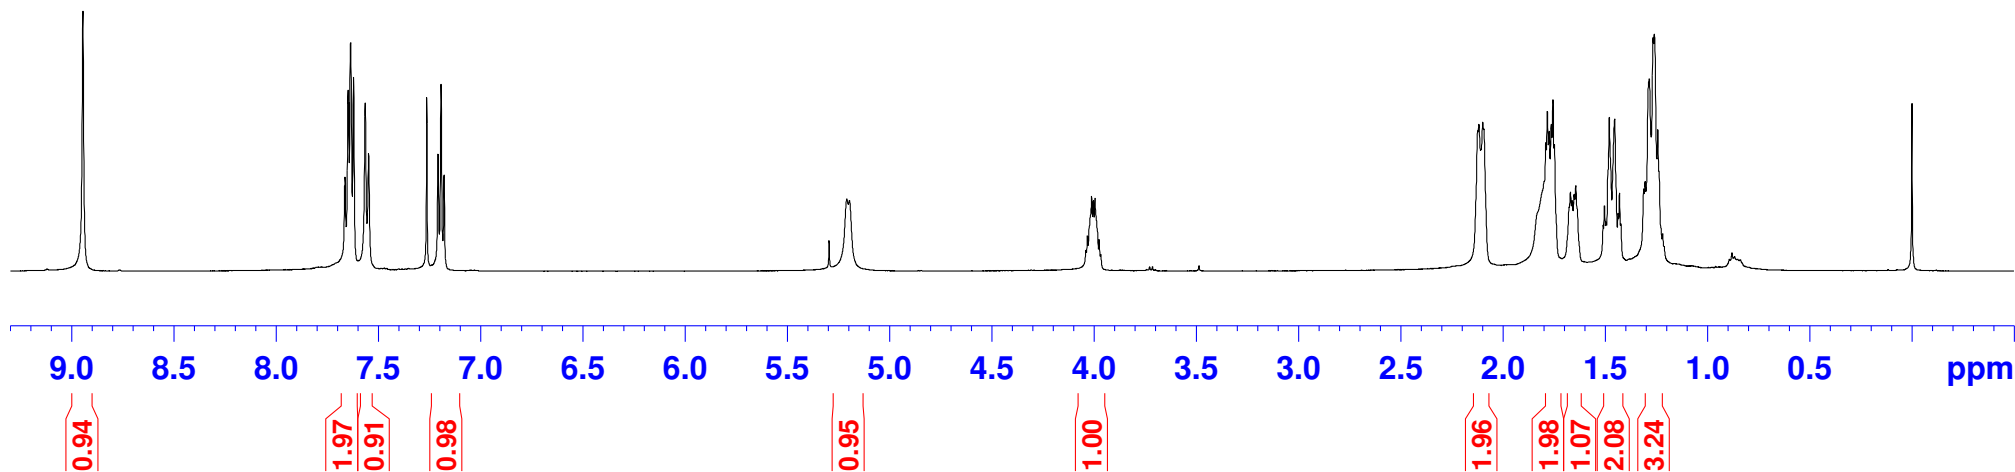

N-cyclohexylquinazolin-2-amine  
C13CPD CDCl<sub>3</sub>

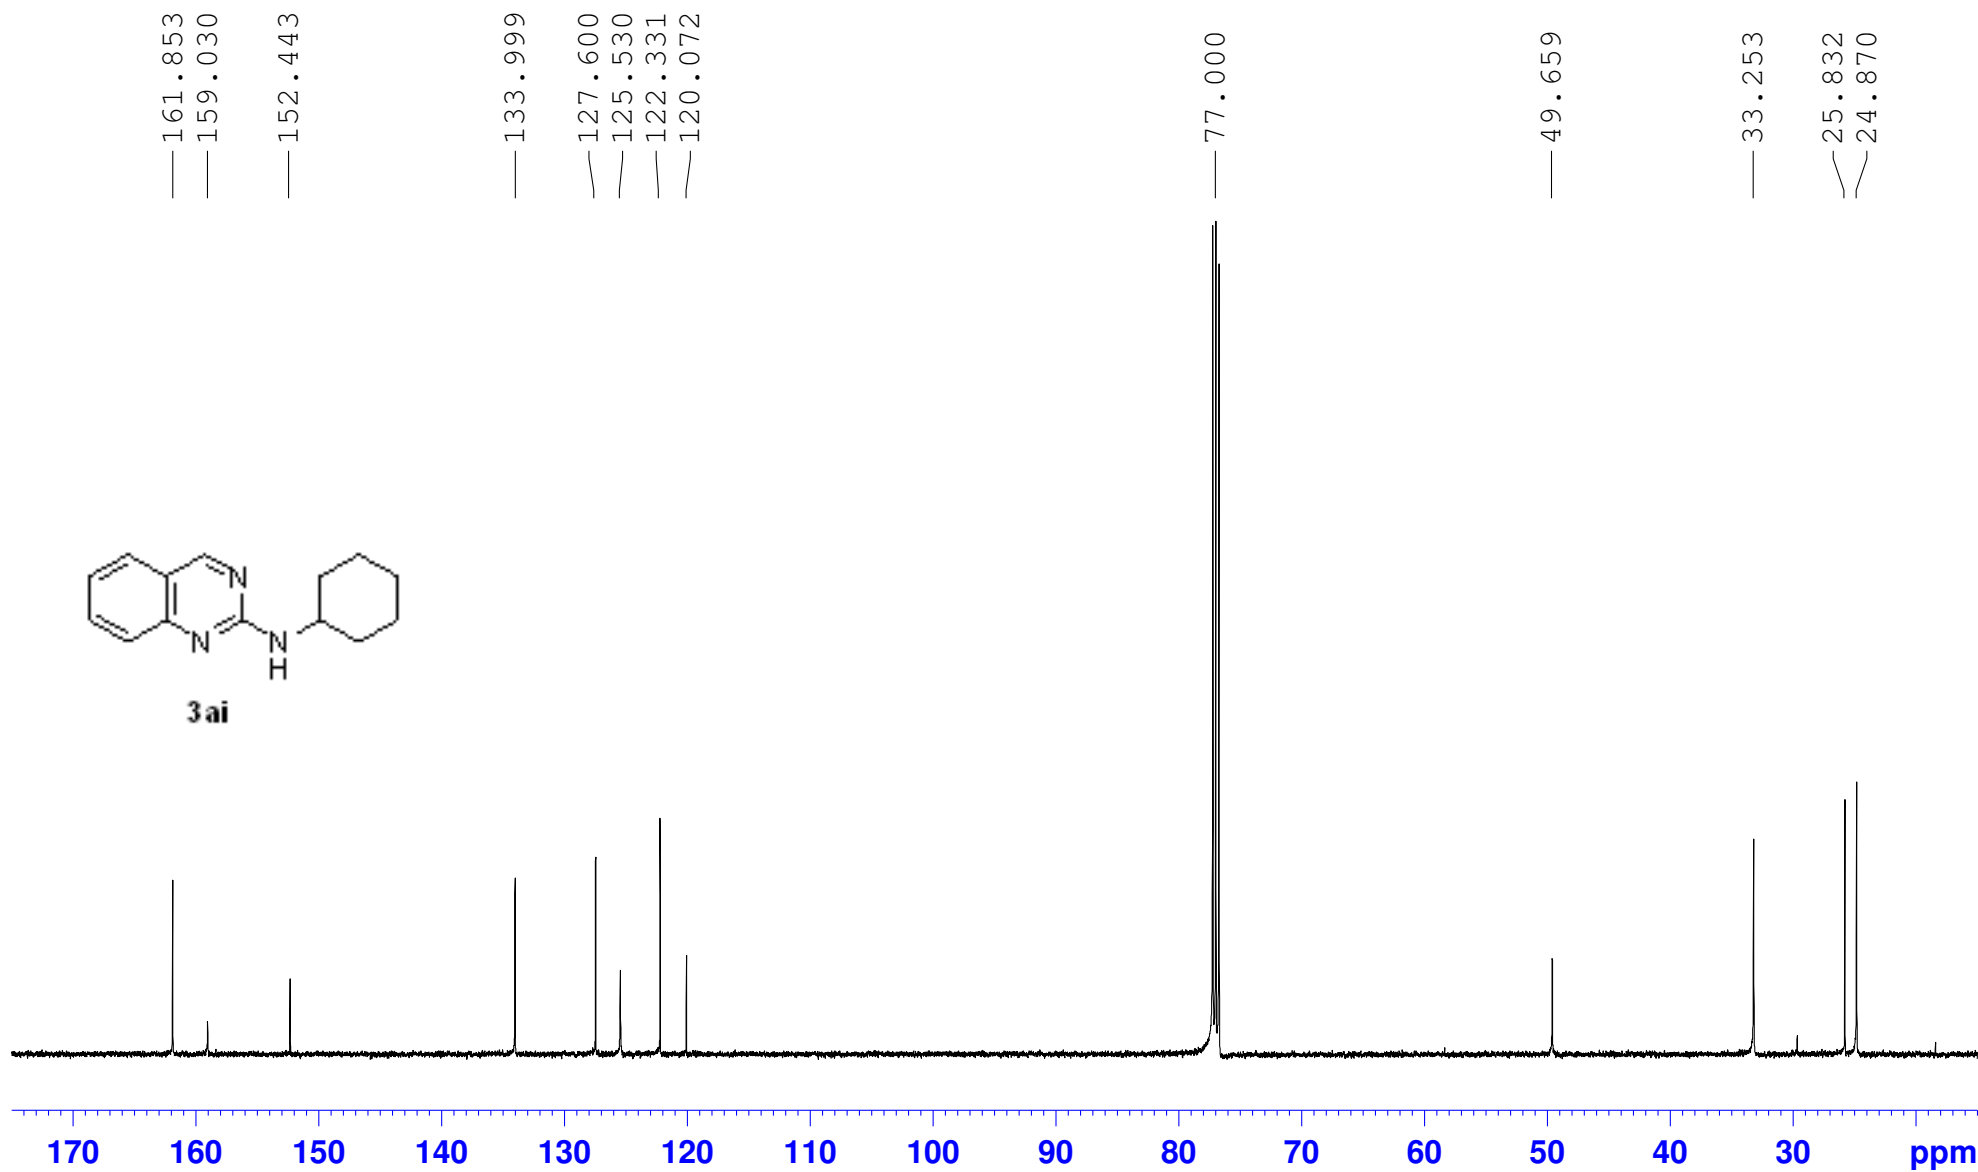

N-phenethylquinazolin-2-amine  
Proton CDCl<sub>3</sub>

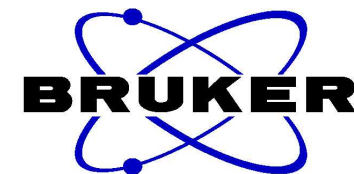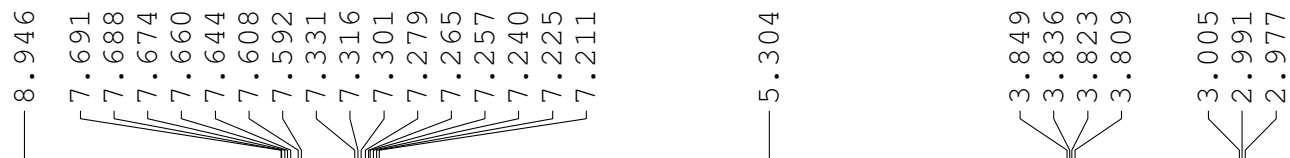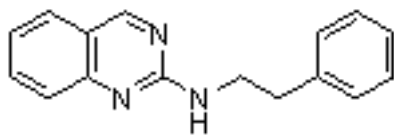

3aj

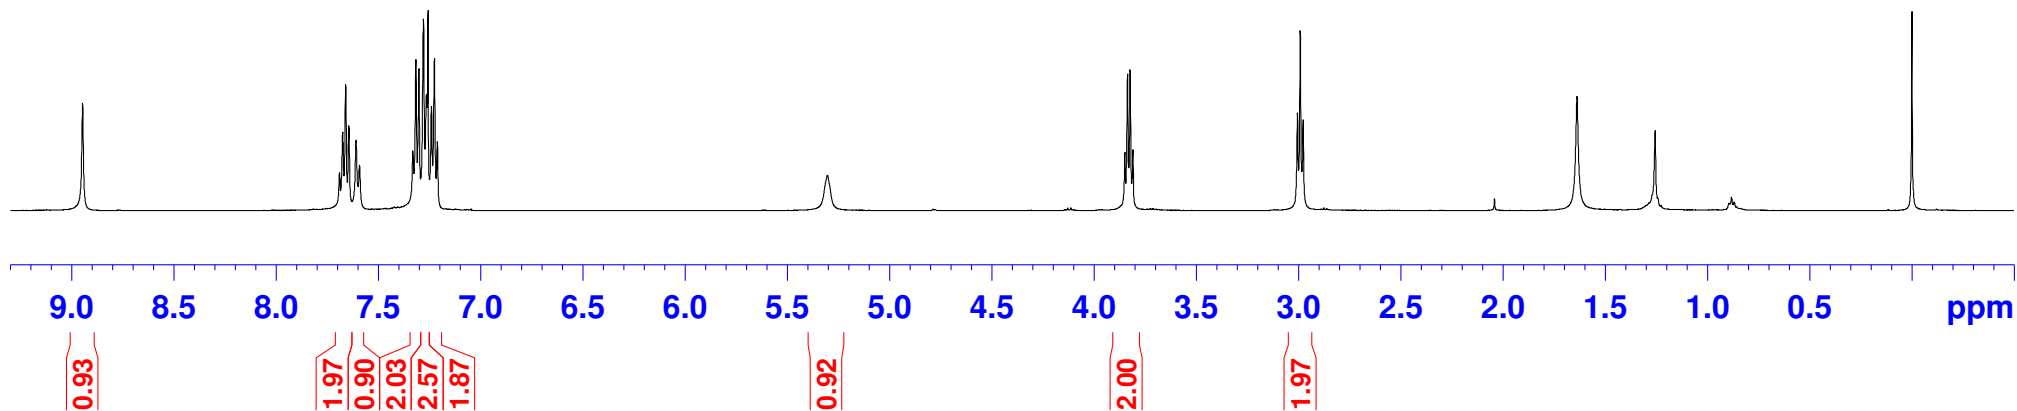

N-phenethylquinazolin-2-amine  
C13CPD CDC13



— 161.968  
— 159.556  
  
— 152.209  
  
— 139.366  
— 134.095  
— 128.935  
— 128.599  
— 127.533  
— 126.355  
— 125.626  
— 122.542  
— 120.242

— 77.000

— 42.727

— 35.702

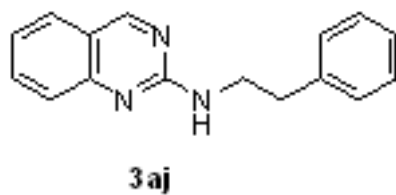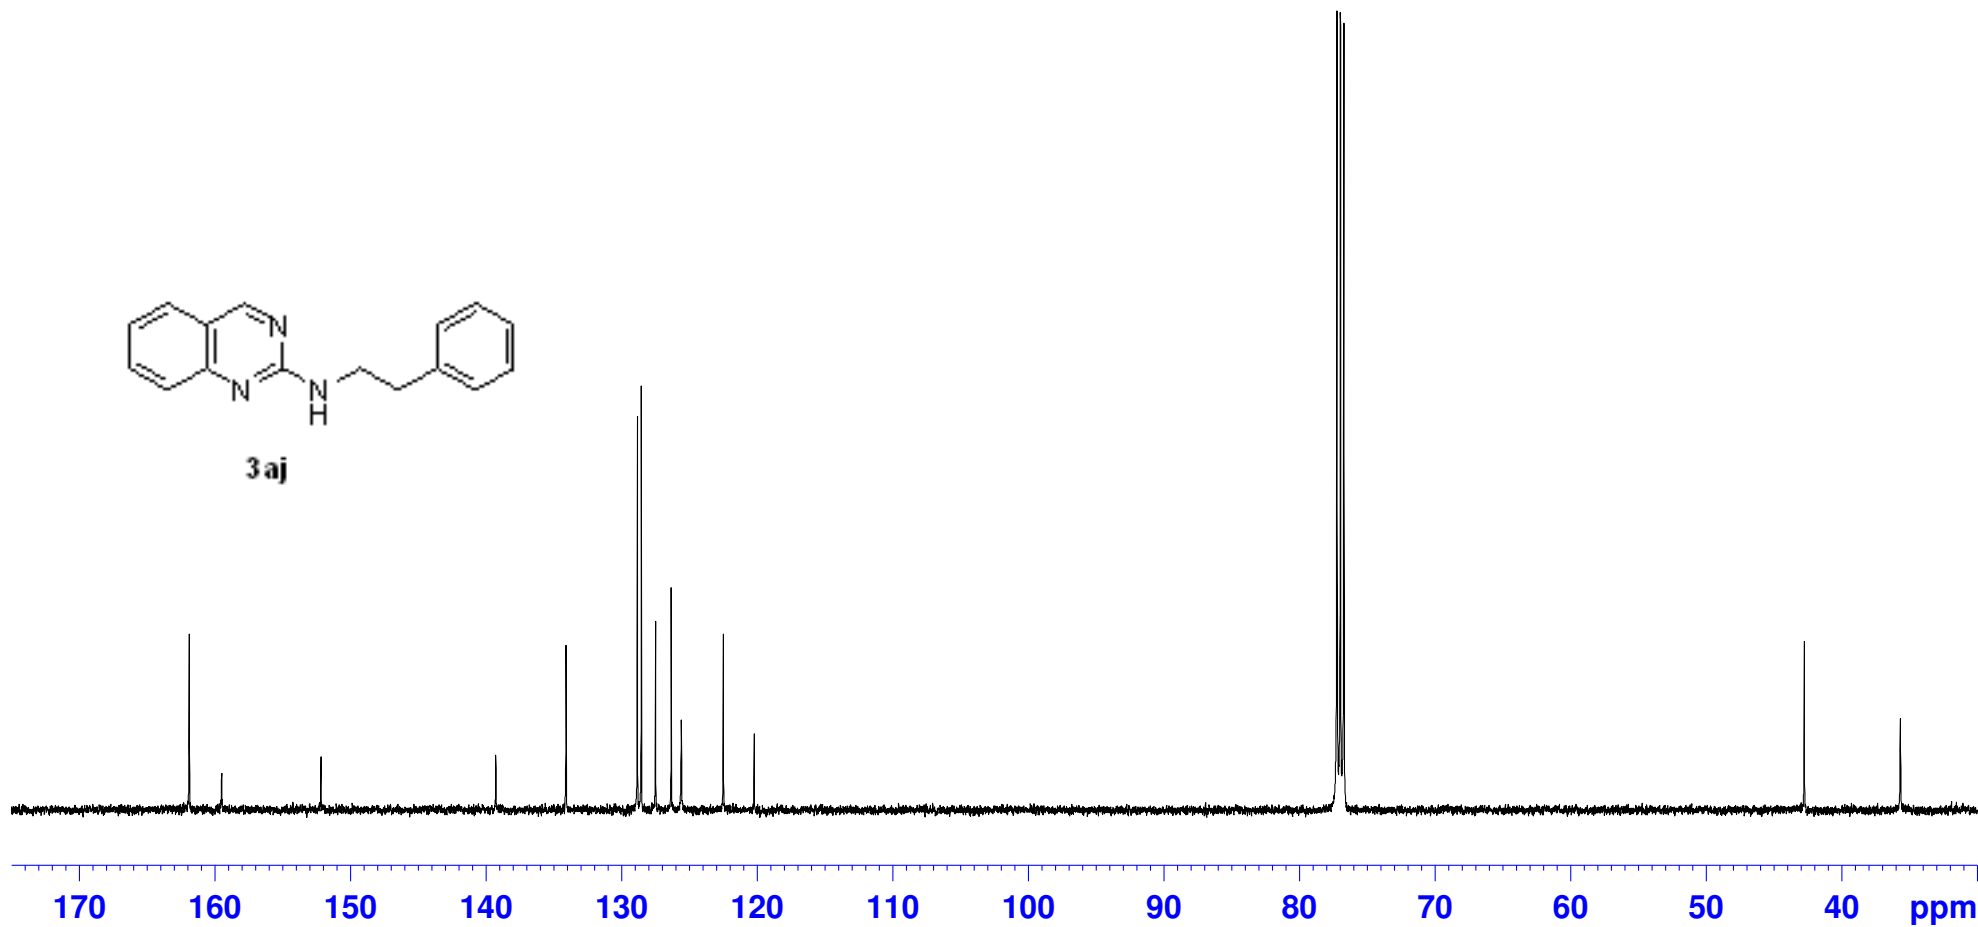

N-(3-phenylpropyl)quinazolin-2-amine  
Proton CDCl<sub>3</sub>



8.953  
7.684  
7.681  
7.667  
7.664  
7.654  
7.651  
7.641  
7.588  
7.572  
7.302  
7.287  
7.273  
7.256  
7.228  
7.215  
7.204  
7.191  
7.177

5.315

3.611  
3.597  
3.584  
3.571

2.777  
2.761  
2.746

2.047  
2.032  
2.017  
2.002  
1.988

0.000

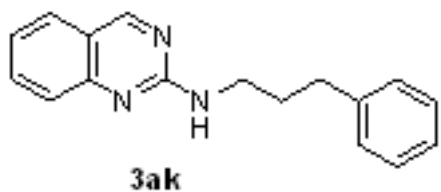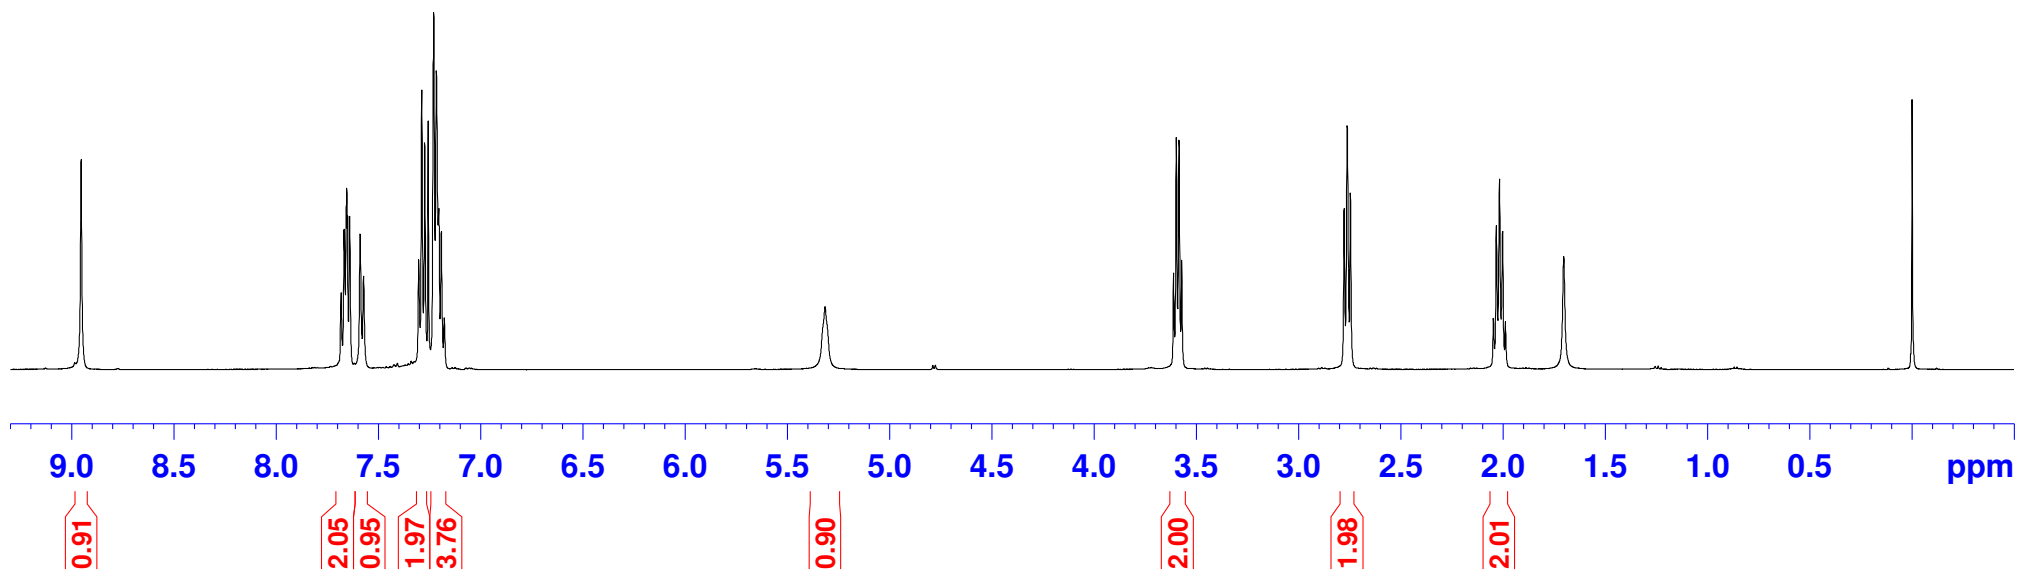

N-(3-phenylpropyl)quinazolin-2-amine  
C13CPD CDCl<sub>3</sub>



161.915  
159.765  
152.199  
141.726  
134.120  
128.375  
128.353  
127.509  
125.876  
125.558  
122.412  
120.182

77.000

41.125

33.243  
31.197

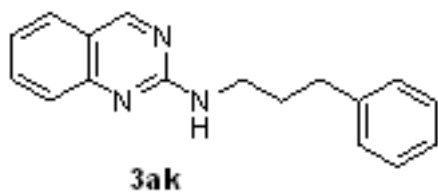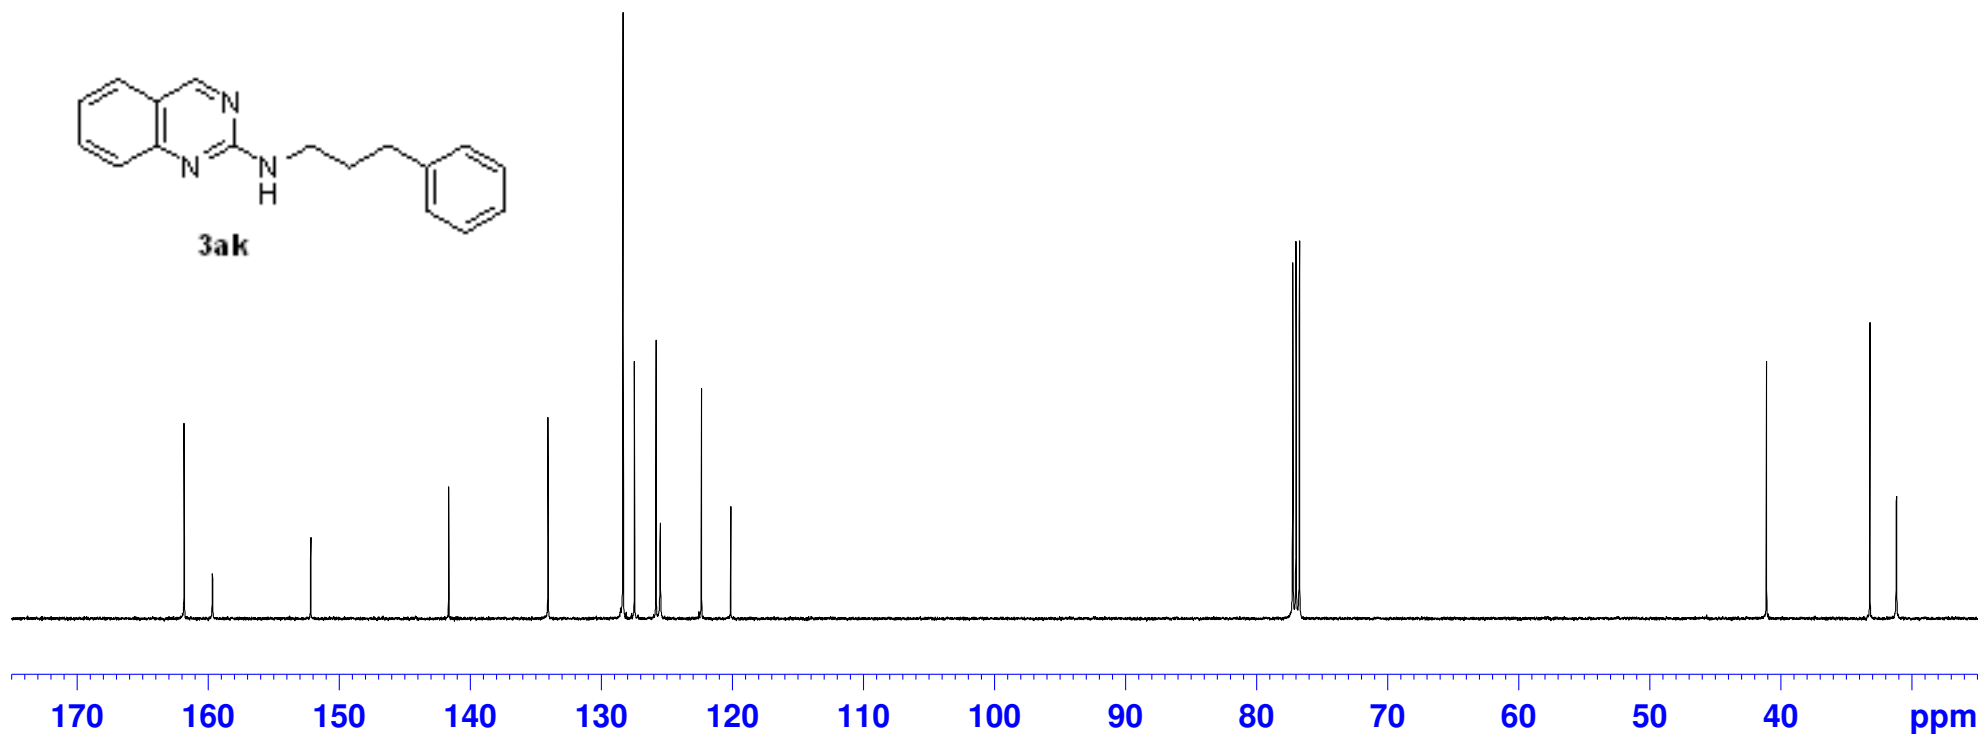

N-benzylquinazolin-2-amine  
Proton CDCl<sub>3</sub>

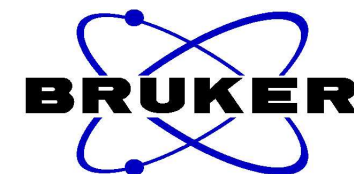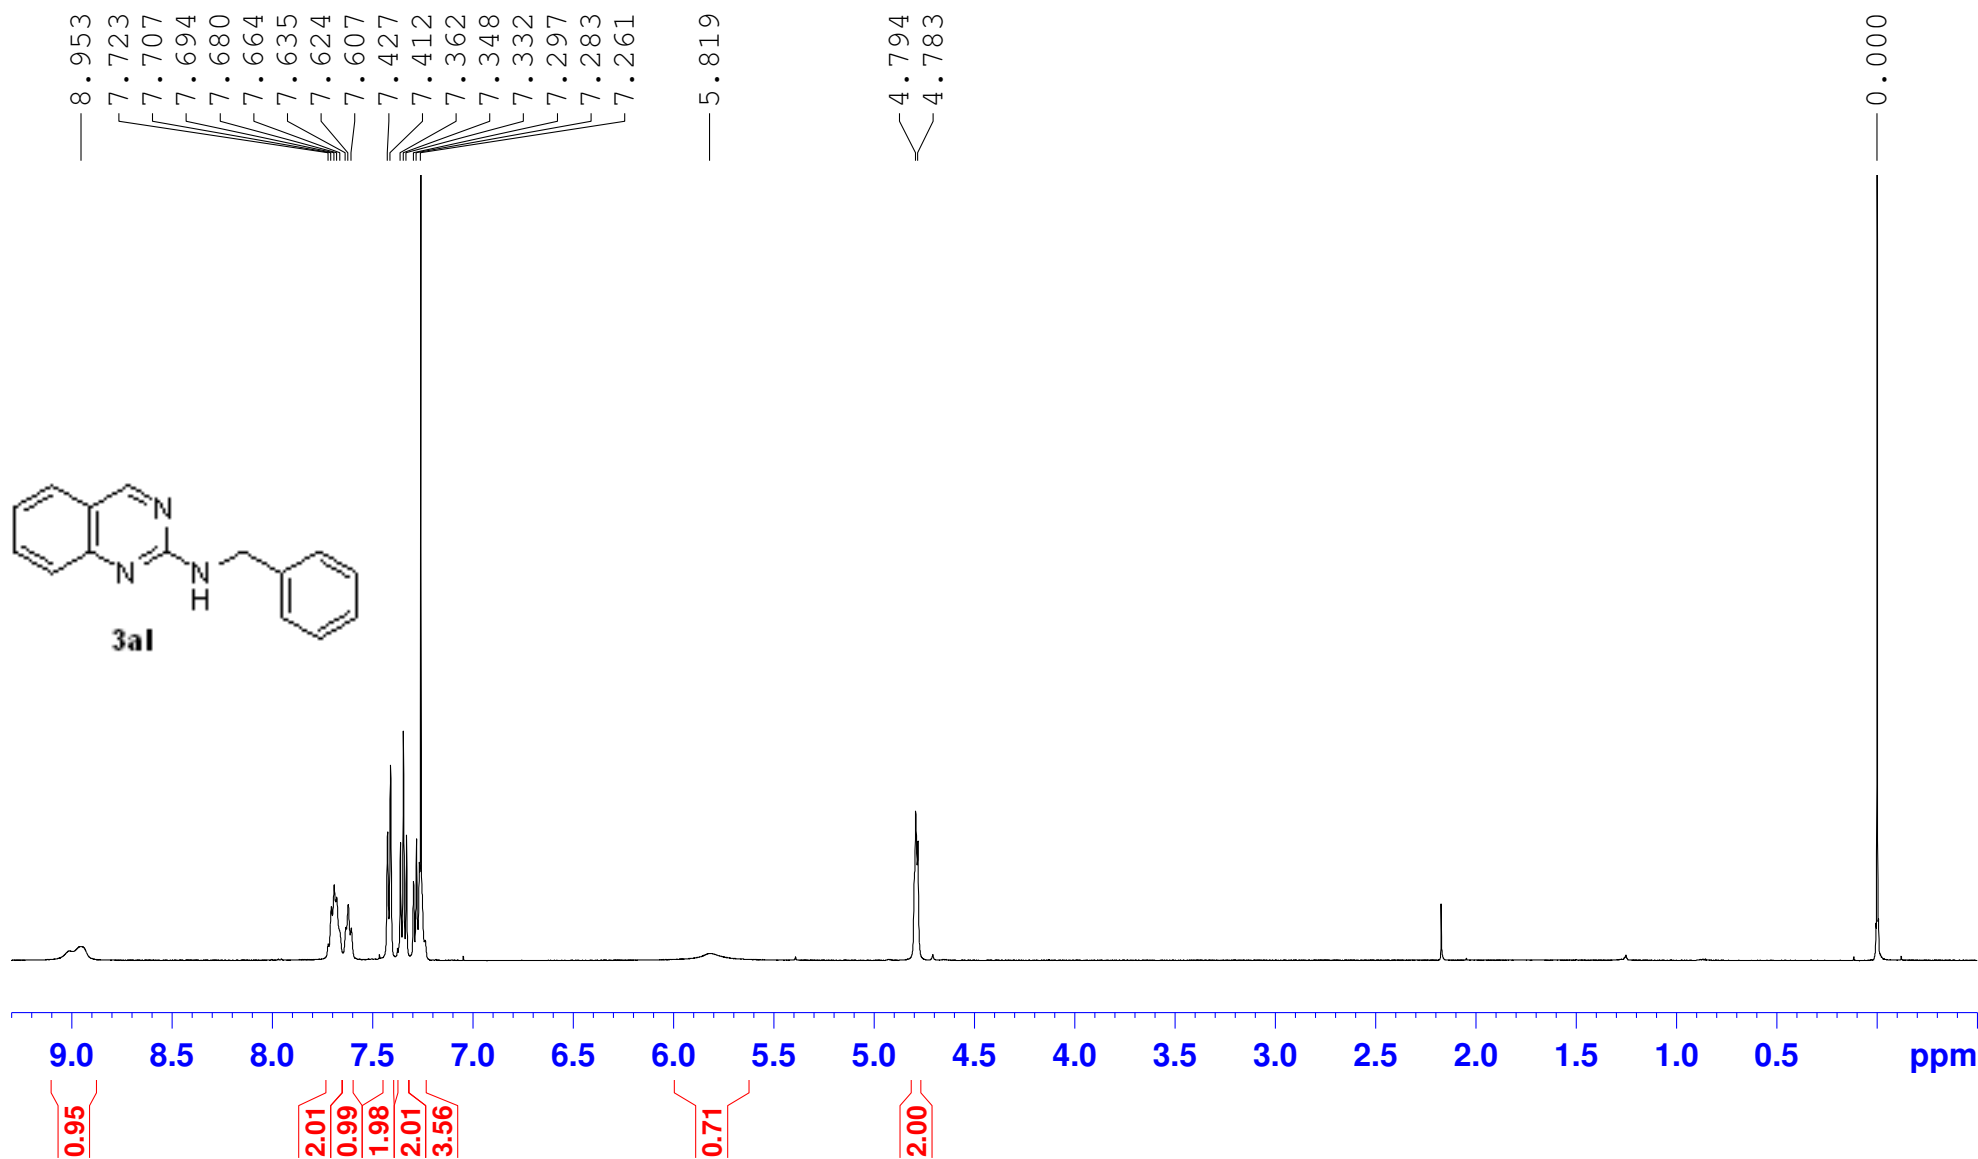



N-benzylquinazolin-2-amine  
C13CPD CDCl3

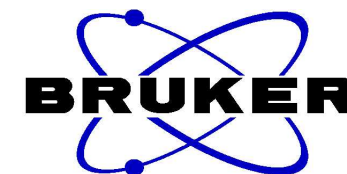

— 162.016  
— 159.565  
  
— 152.167  
  
— 139.209  
— 134.175  
— 128.571  
— 127.774  
— 127.514  
— 127.243  
— 125.648  
— 122.578  
— 120.344

— 45.

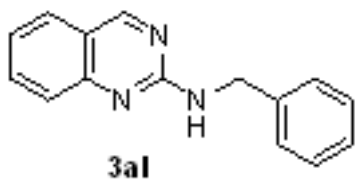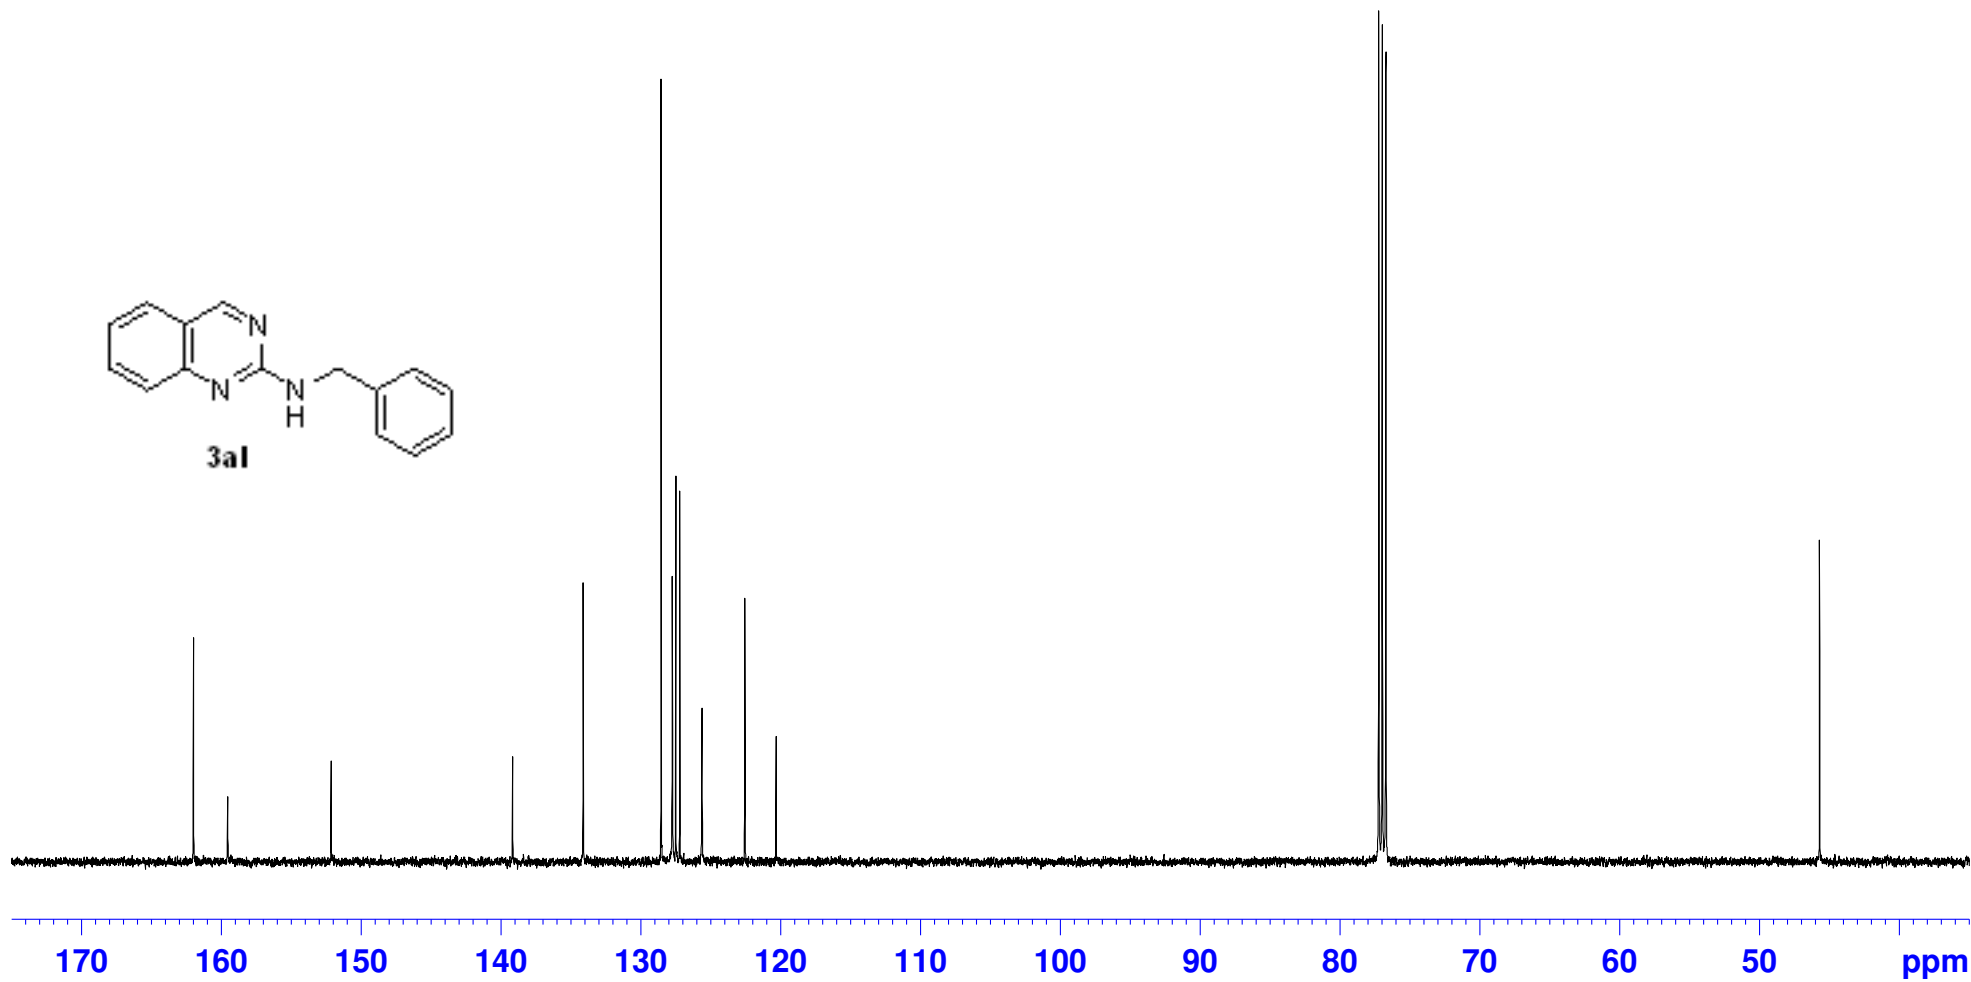

N-(4-methylbenzyl)quinazolin-2-amine  
Proton CDCl<sub>3</sub>

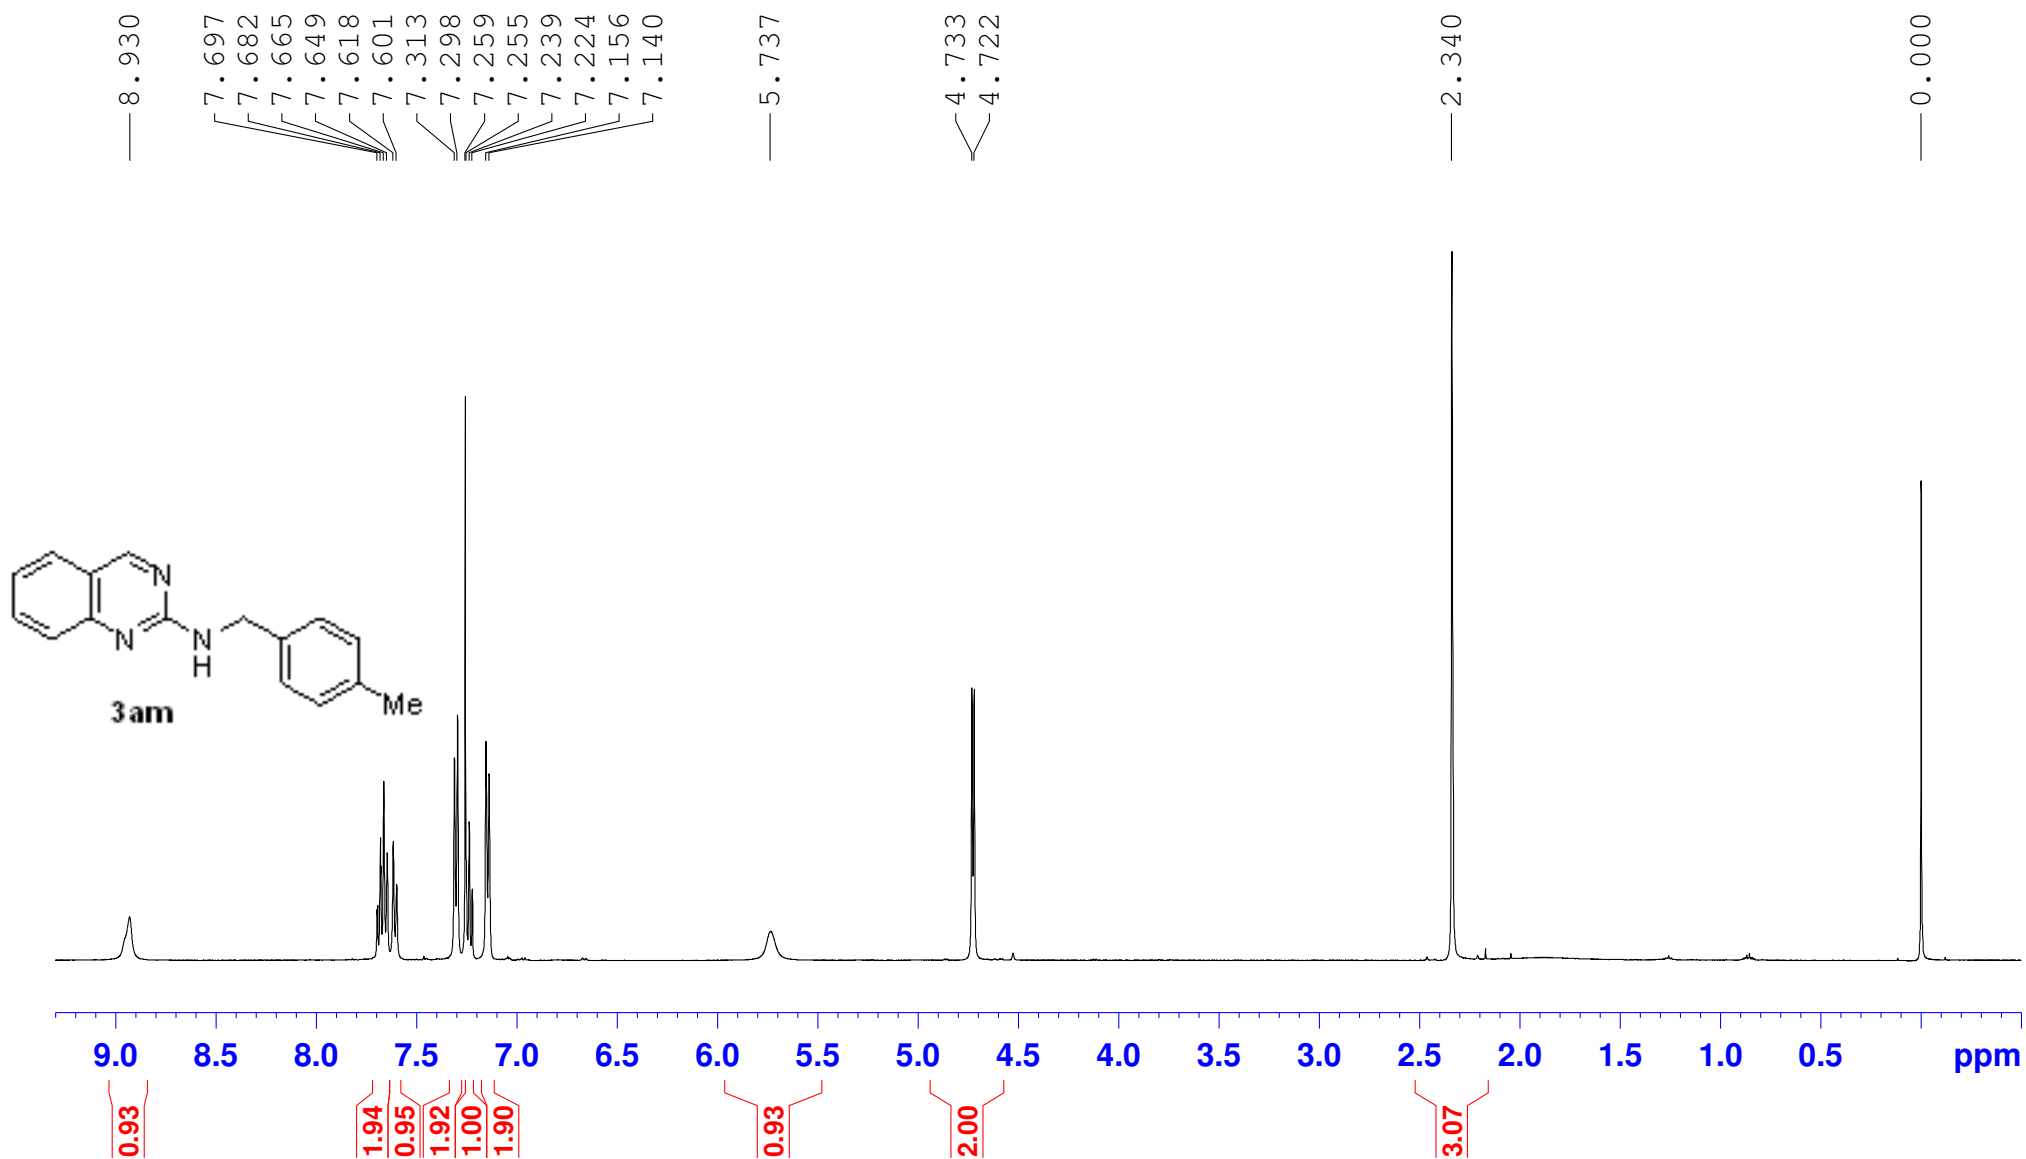

N-(4-methylbenzyl)quinazolin-2-amine  
C13CPD CDC13

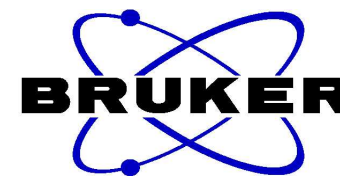

162.003  
159.457  
152.121  
136.866  
136.043  
134.162  
129.238  
127.790  
127.531  
125.611  
122.545  
120.298

77.000

45.500

21.0

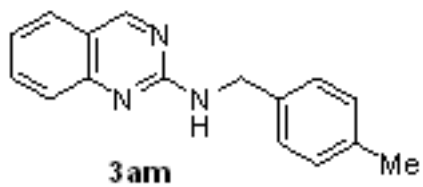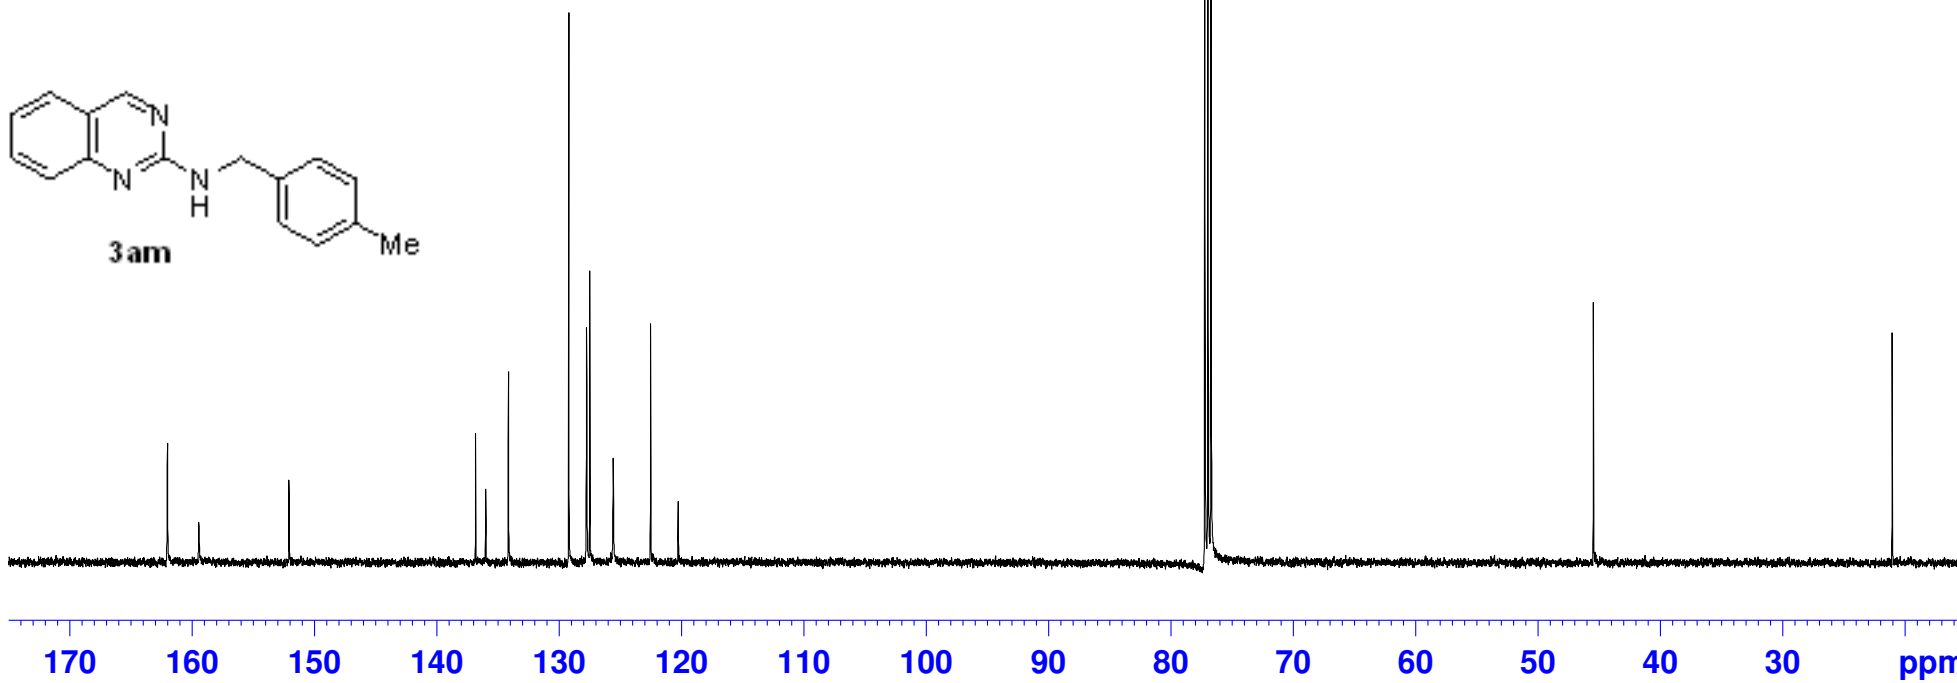

N-(4-(trifluoromethyl)benzyl)quinazolin-2-amine  
Proton CDCl<sub>3</sub>



8.956  
7.707  
7.703  
7.693  
7.690  
7.686  
7.684  
7.676  
7.673  
7.668  
7.596  
7.576  
7.533  
7.517  
7.275  
7.260  
7.245

5.822

4.855  
4.842

0.000

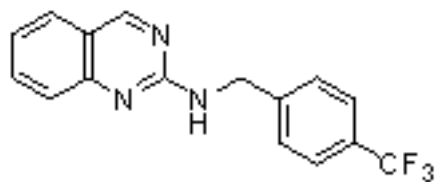

3an

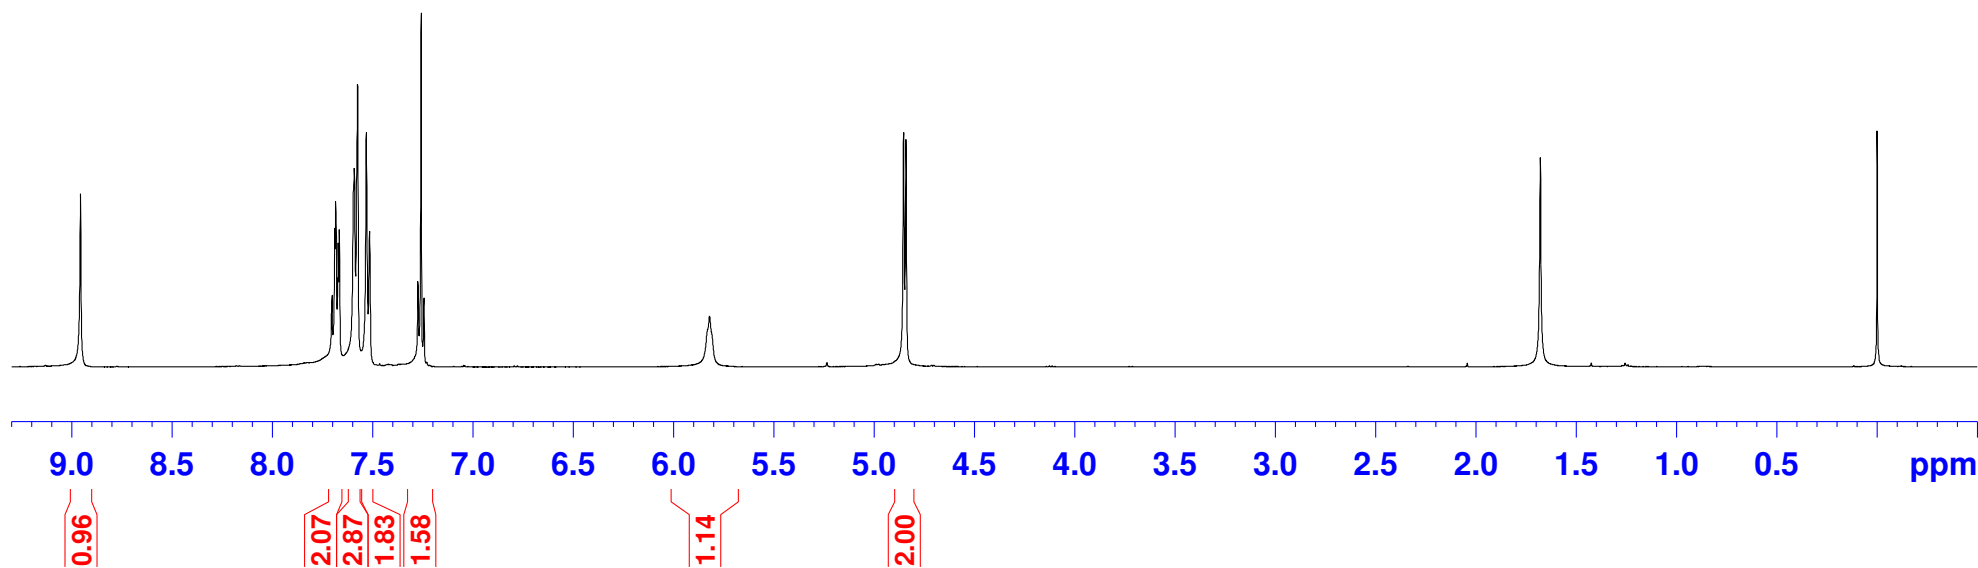

N-(4-(trifluoromethyl)benzyl)quinazolin-2-amine  
C13CPD CDCl<sub>3</sub>

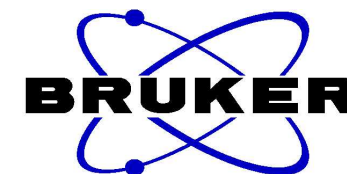

— 162.073  
— 159.423  
  
— 152.026  
  
— 143.587  
— 134.305  
— 129.837  
— 129.581  
— 129.321  
— 129.065  
— 127.768  
— 127.537  
— 125.680  
— 125.458  
— 125.265  
— 123.100  
— 122.913  
— 120.940  
— 120.484

— 77.001

— 45.1

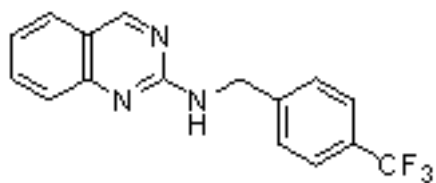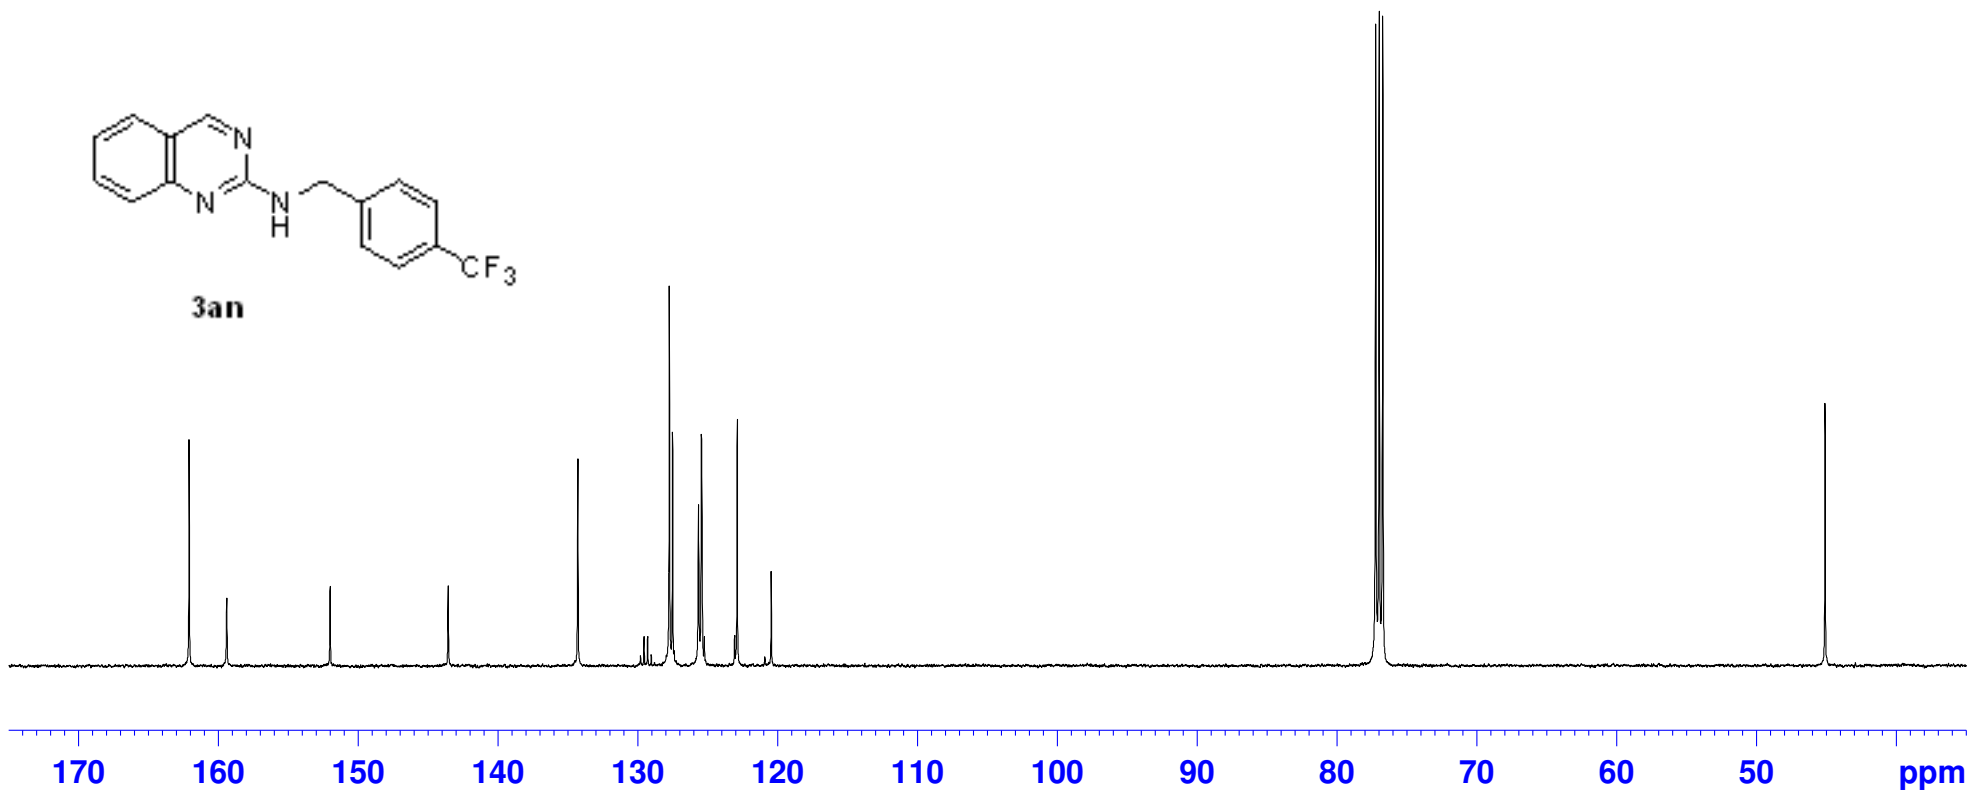

N-(thiophen-2-ylmethyl)quinazolin-2-amine  
Proton CDCl<sub>3</sub>

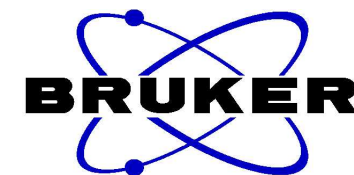

8.941  
7.710  
7.696  
7.679  
7.662  
7.644  
7.627  
7.269  
7.257  
7.239  
7.209  
7.199  
7.072  
7.067  
6.968  
6.960  
6.951  
5.792  
4.945  
4.933  
0.000

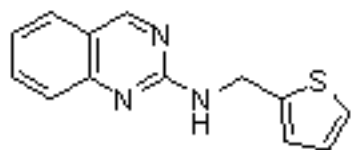

3ao

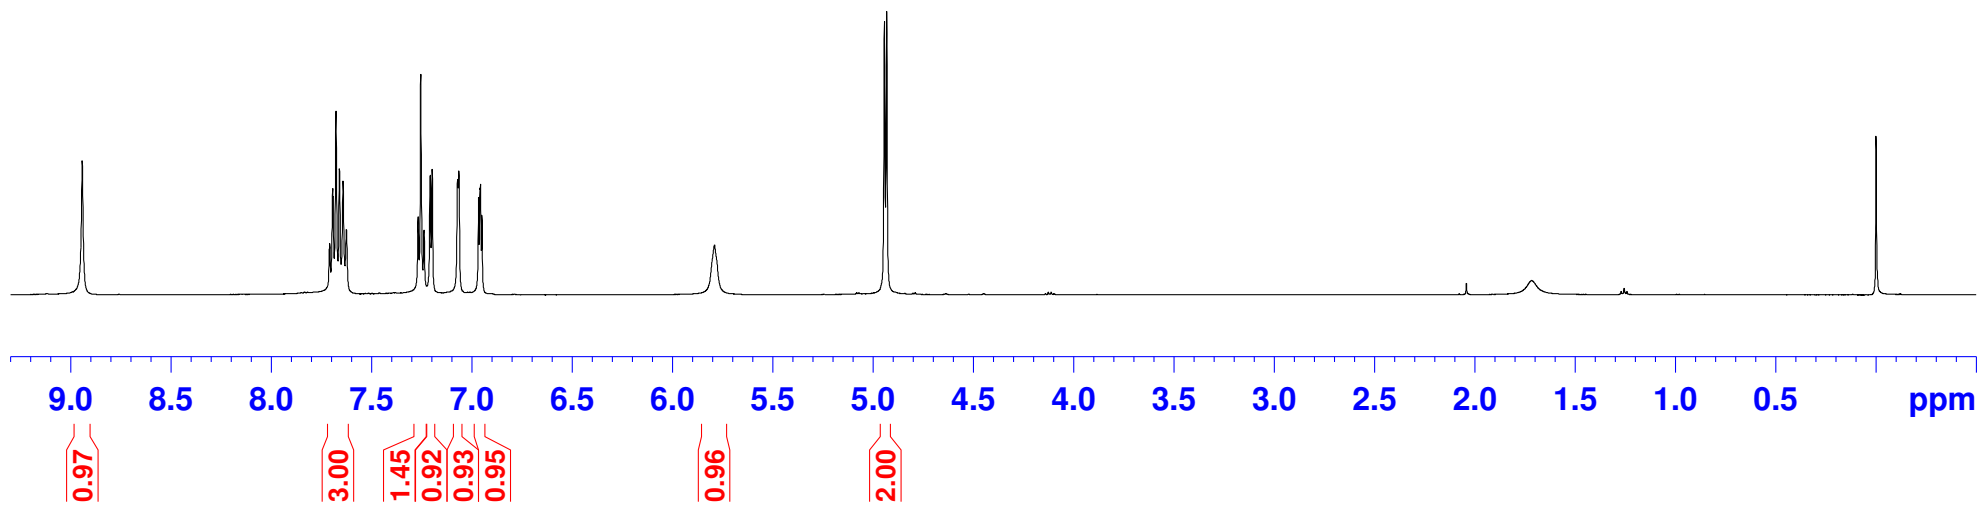

N-(thiophen-2-ylmethyl)quinazolin-2-amine  
C13CPD CDCl3

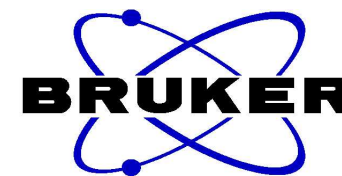

— 162.023  
— 159.102  
— 151.993  
— 142.073  
— 134.192  
— 127.579  
— 126.697  
— 125.703  
— 125.644  
— 124.879  
— 122.840  
— 120.415

— 77.000

— 40.577

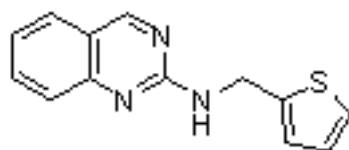

3ao

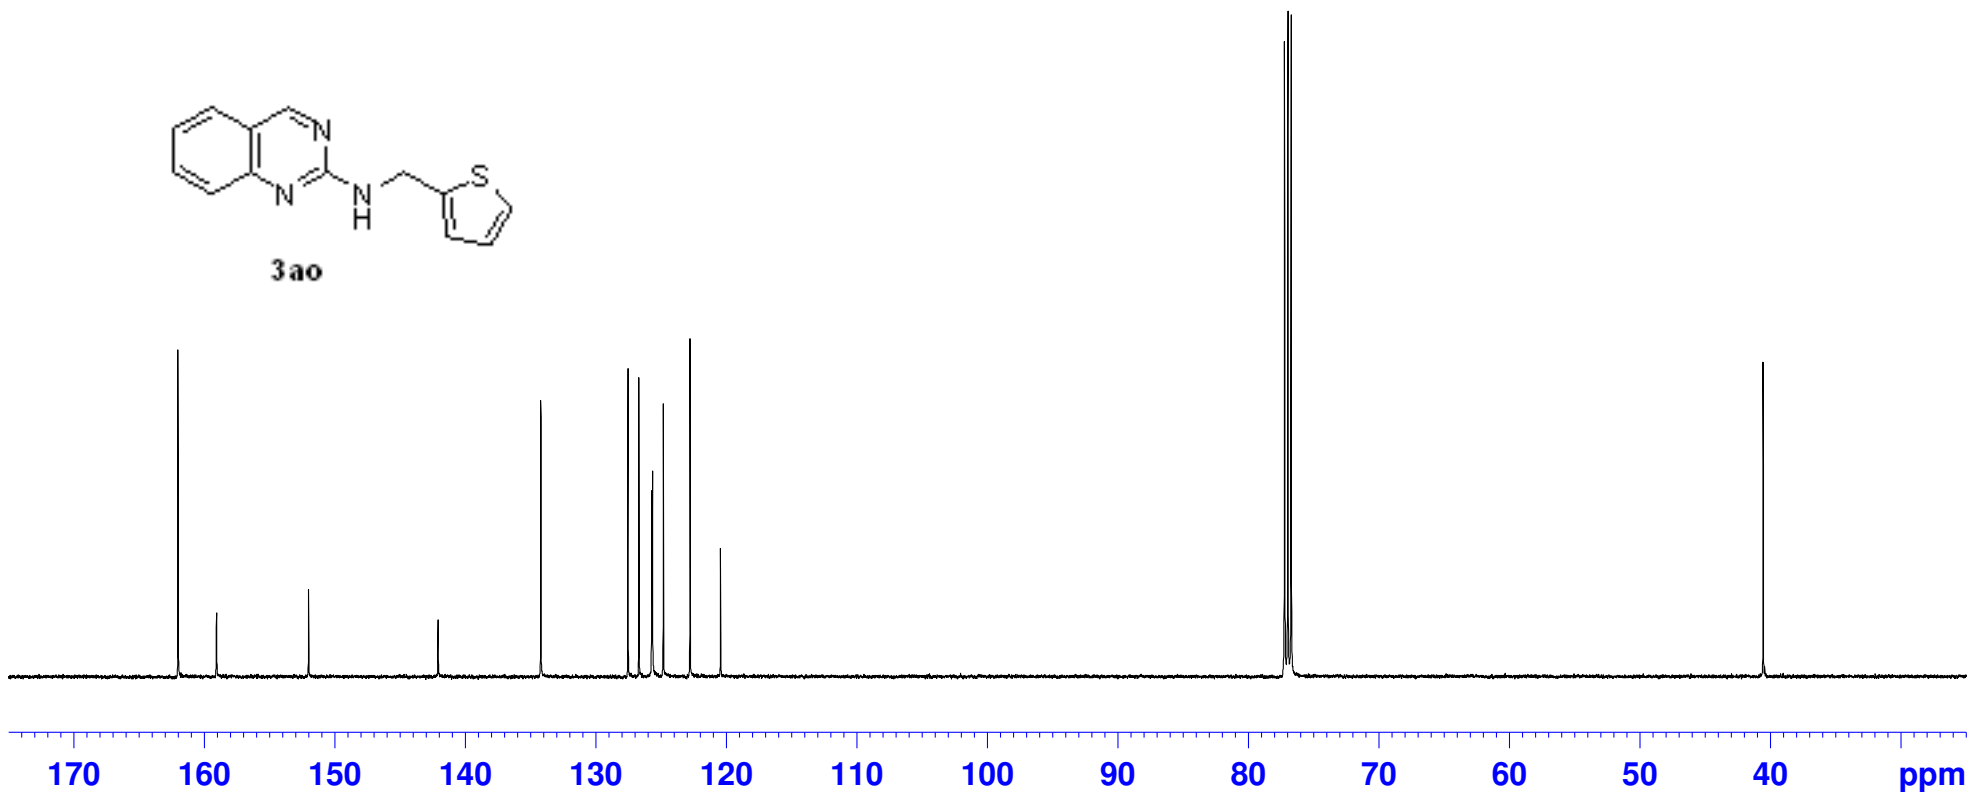

N-butyl-6-methoxyquinazolin-2-amine  
Proton CDCl<sub>3</sub>

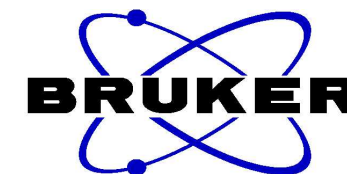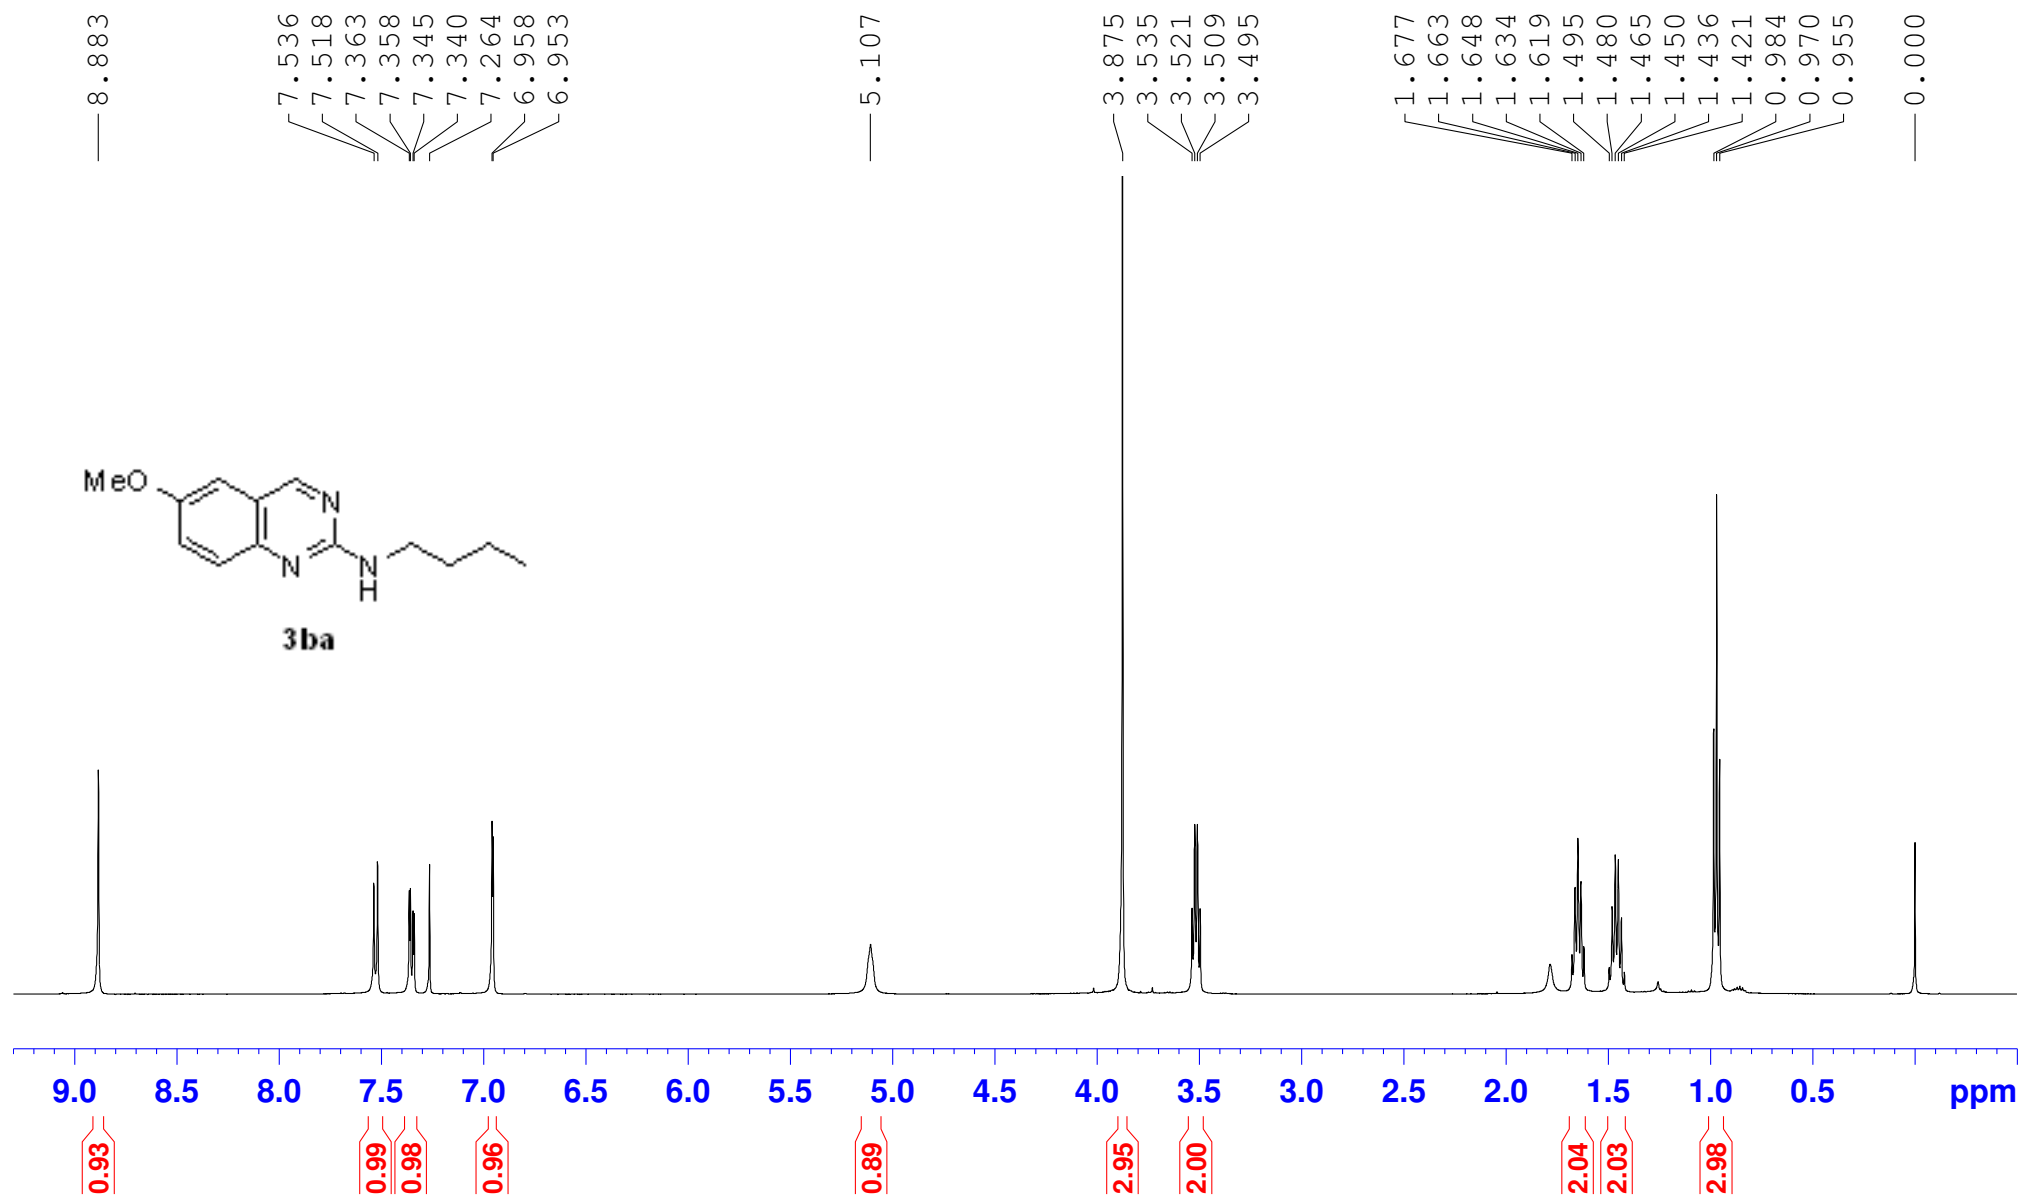



N-butyl-6-methoxyquinazolin-2-amine  
C13CPD CDC13



160.325  
159.135  
154.794  
148.213

127.140  
126.510  
120.209

105.087

77.000

55.535

41.440

31.819

20.172

13.842

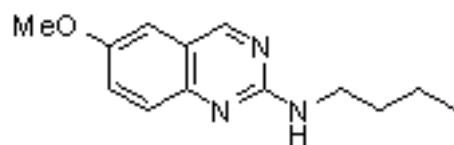

**3ba**

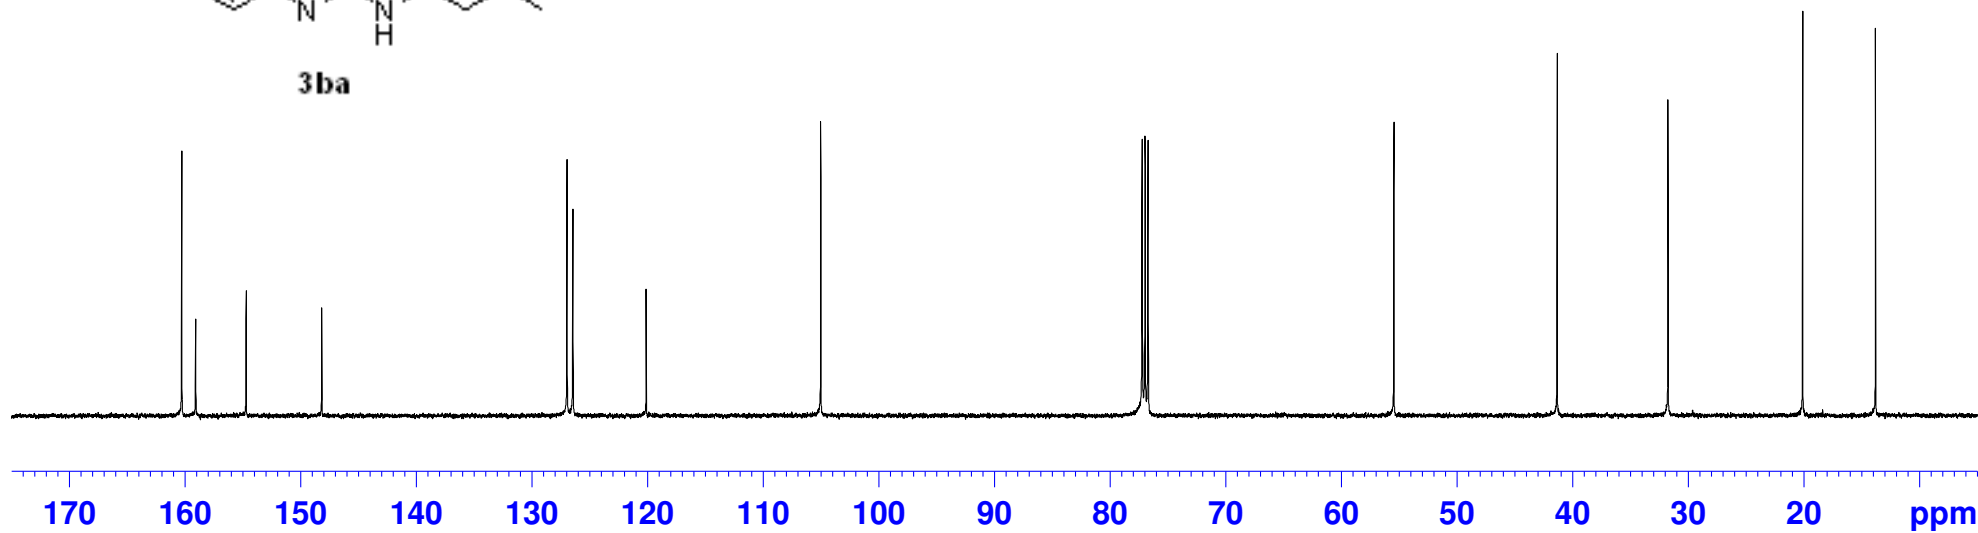

N-butyl-6-(trifluoromethyl)quinazolin-2-amine  
Proton CDCl<sub>3</sub>

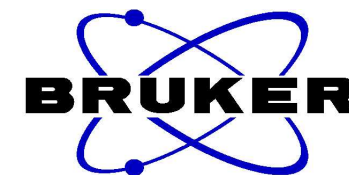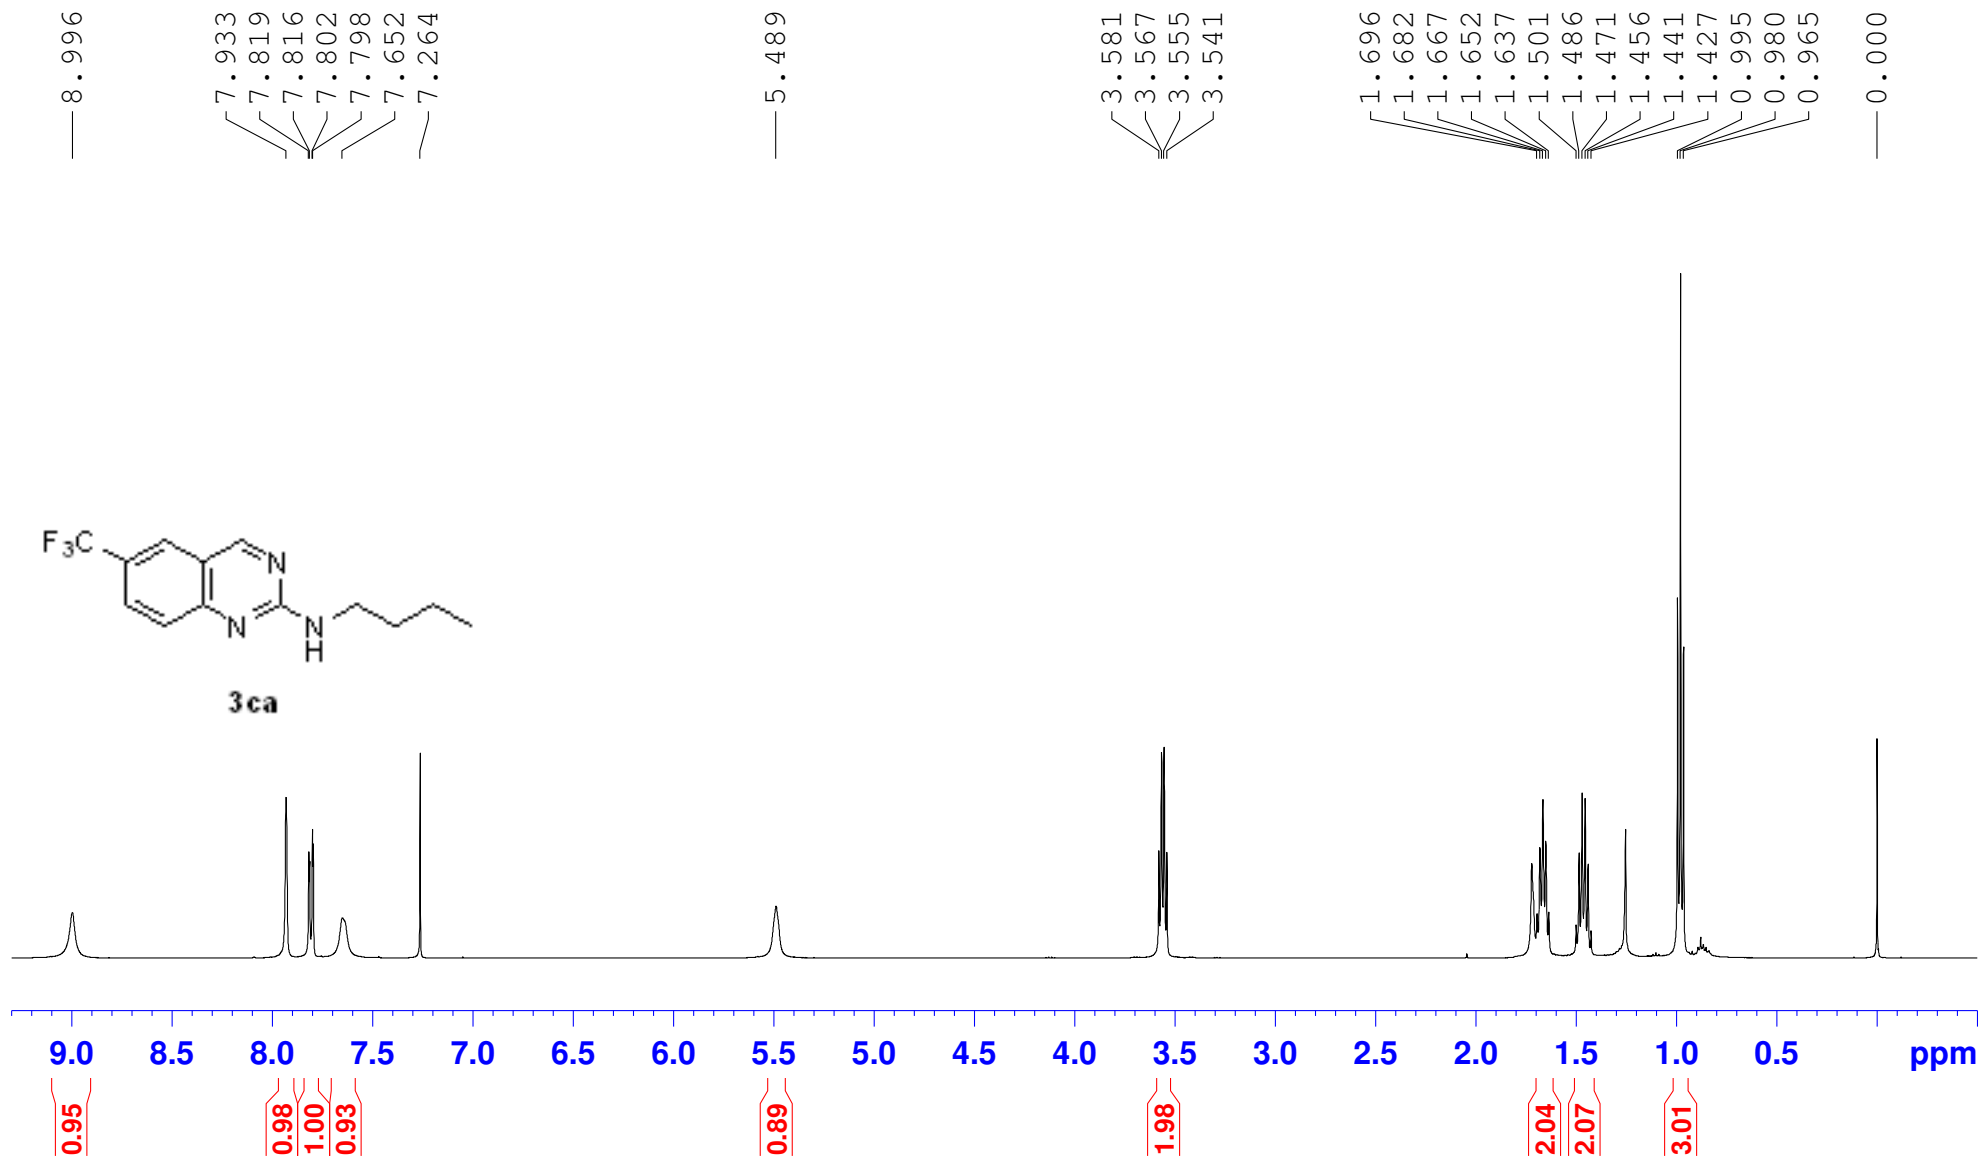

N-butyl-6-(trifluoromethyl)quinazolin-2-amine  
C13CPD CDC13

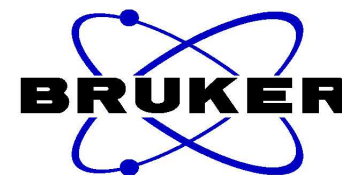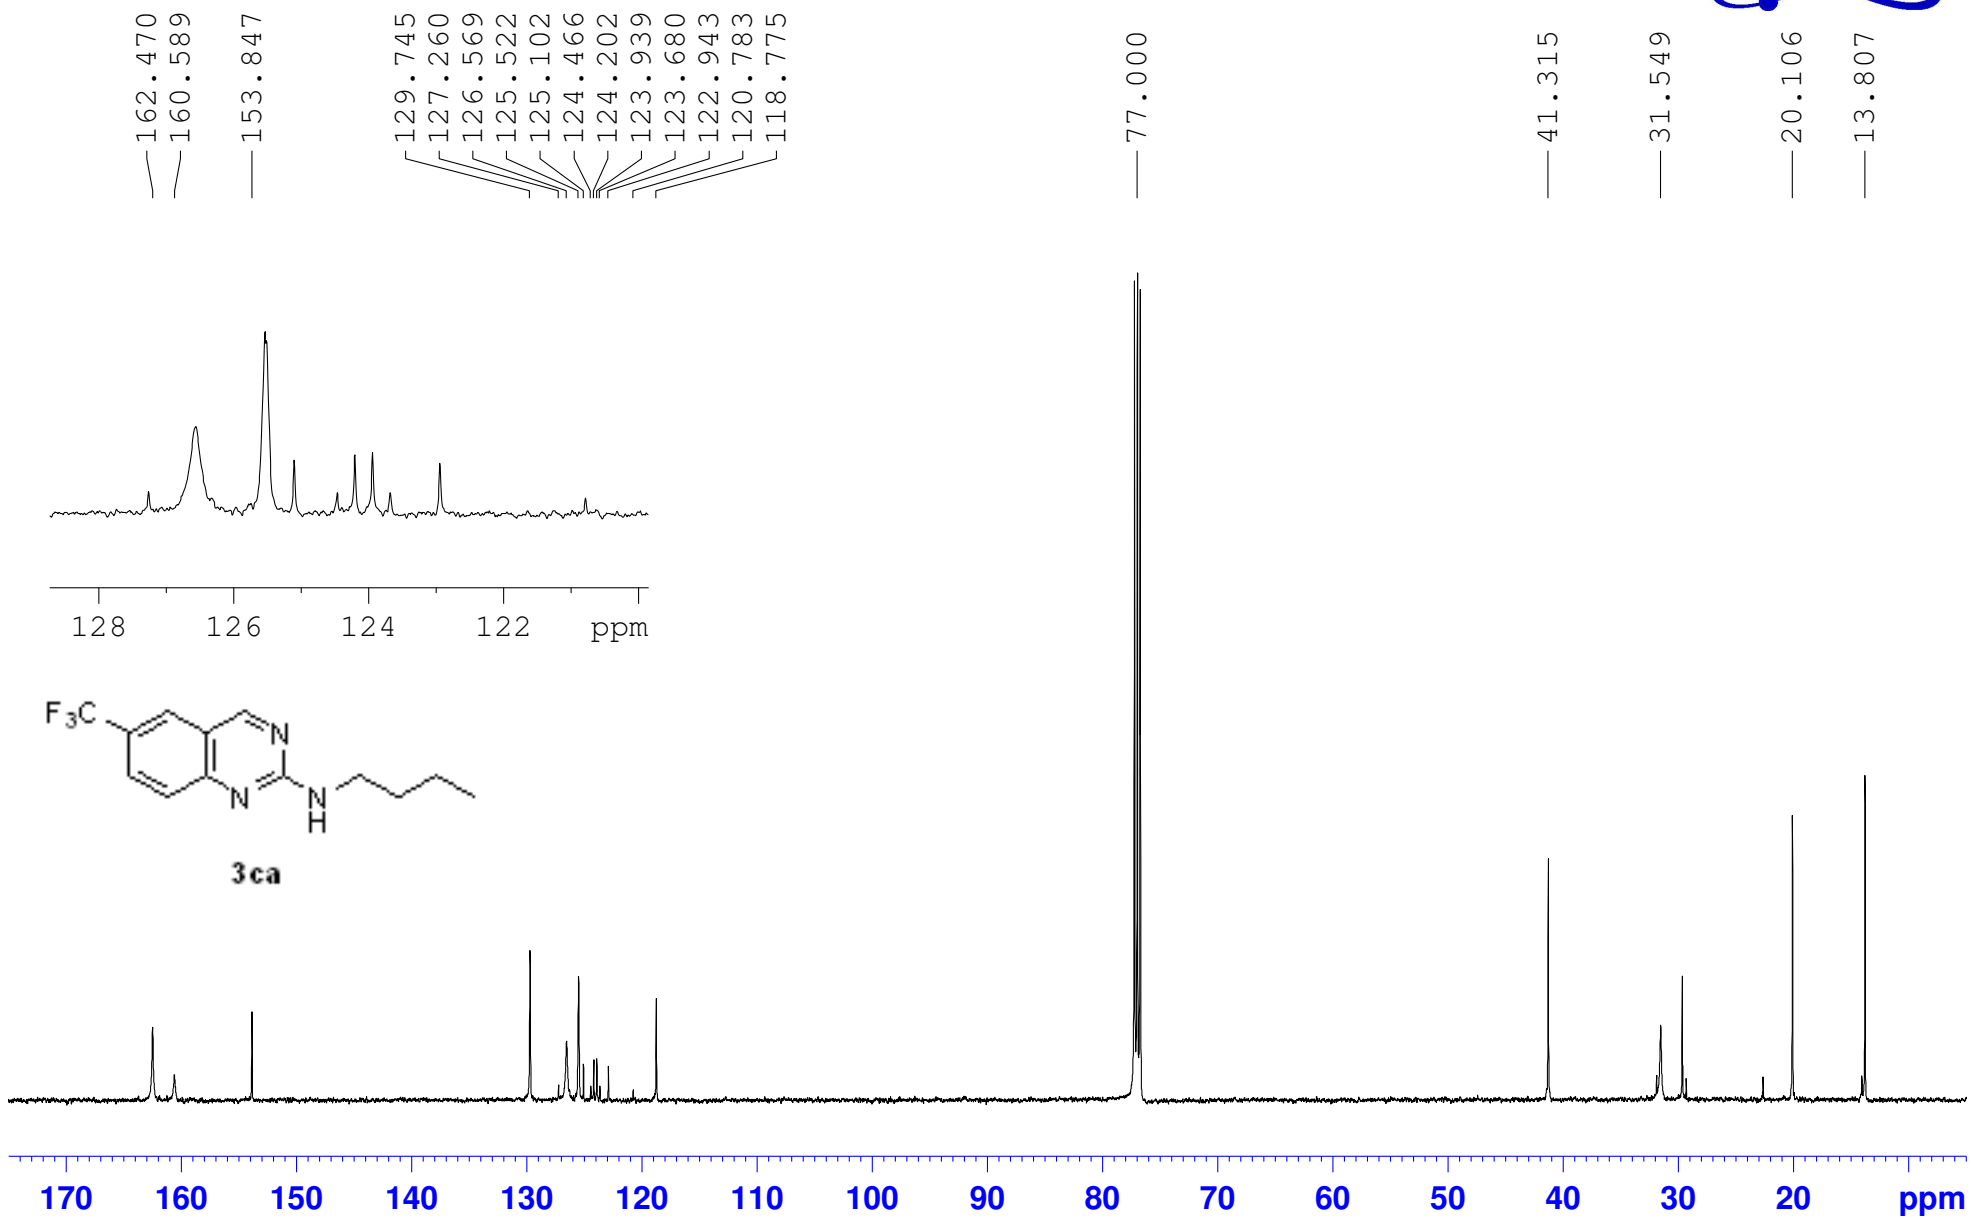

N-butyl-6-fluoroquinazolin-2-amine  
Proton CDCl<sub>3</sub>

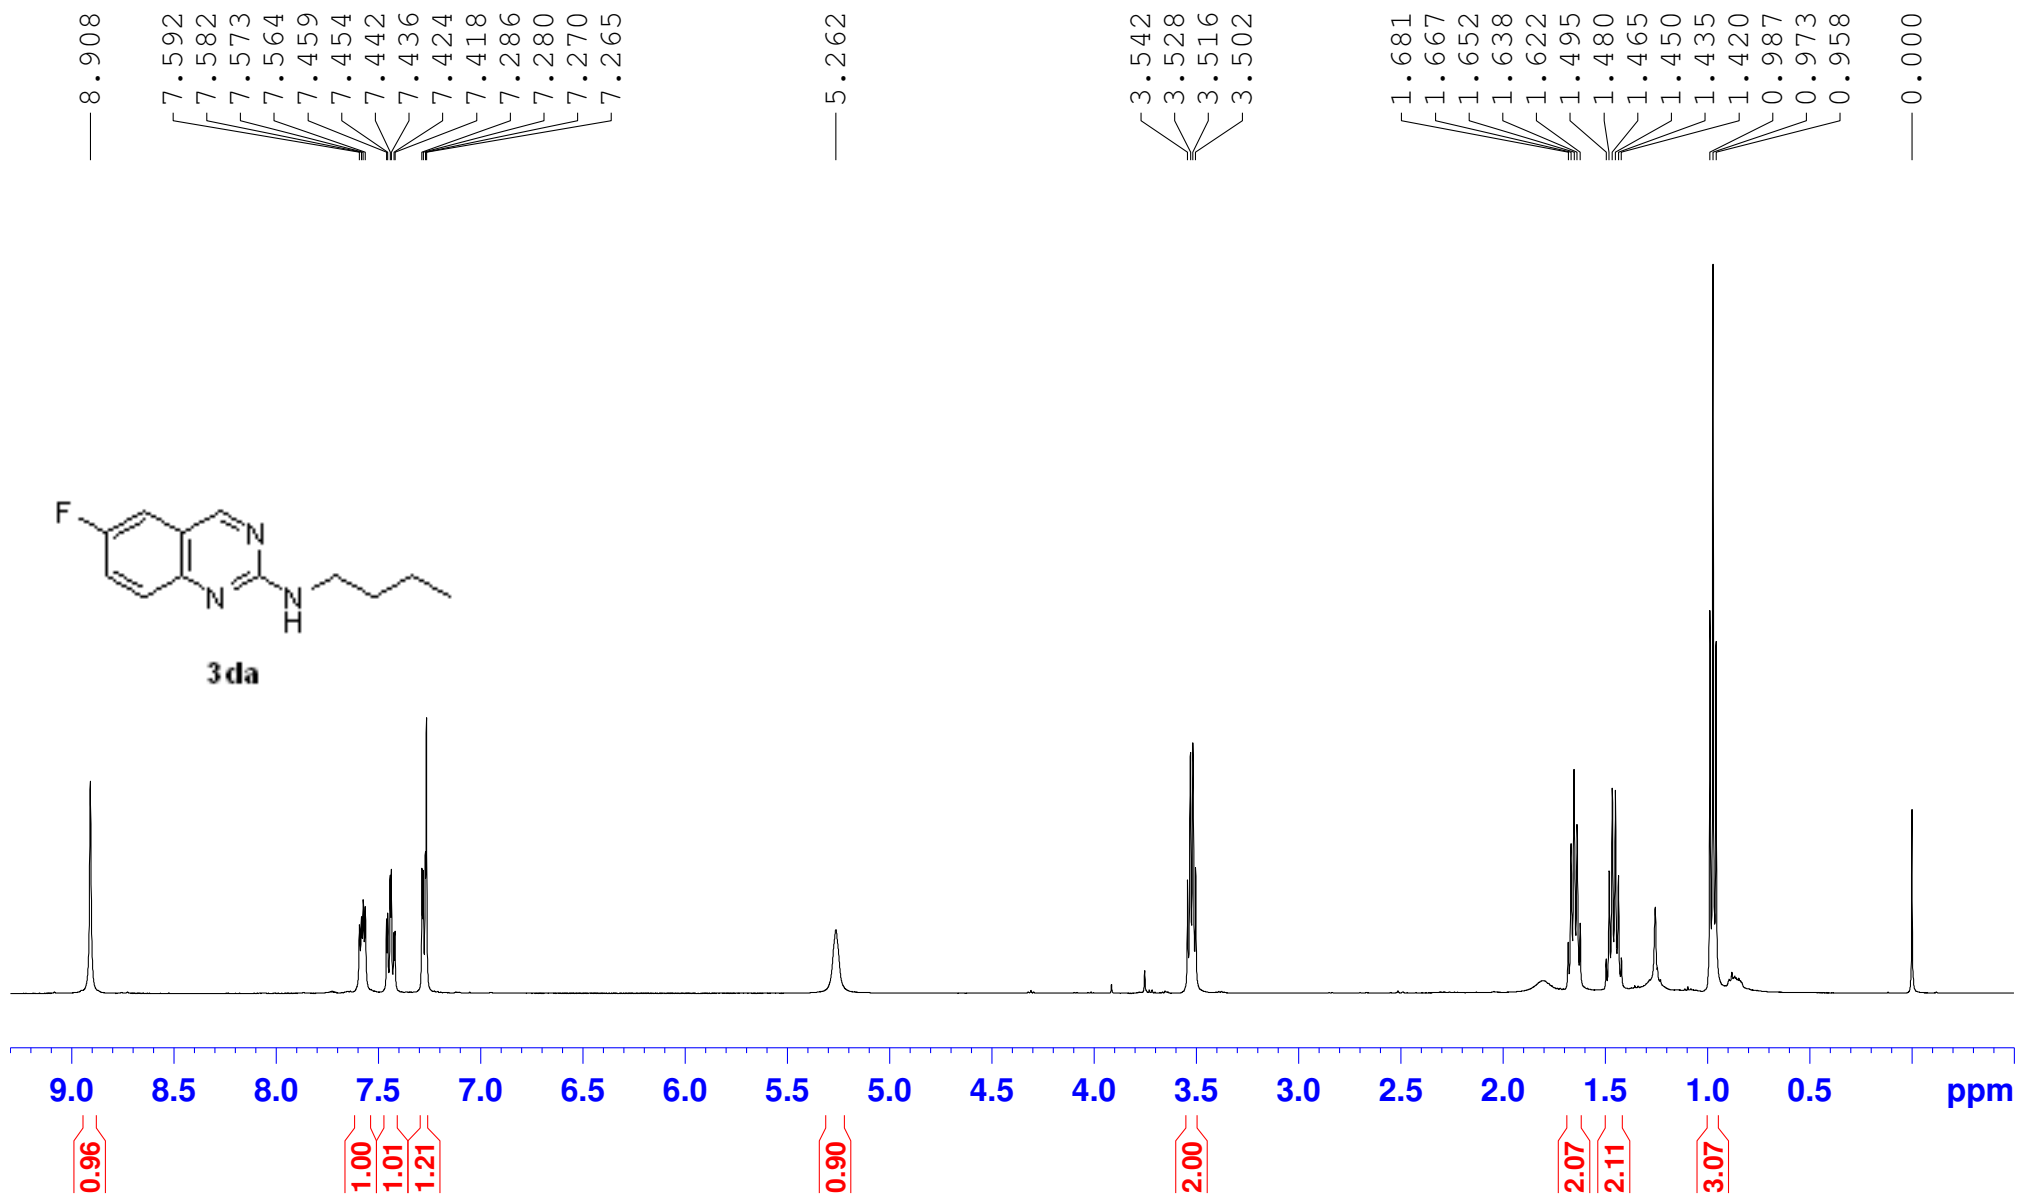

N-butyl-6-fluoroquinazolin-2-amine  
C13CPD CDC13

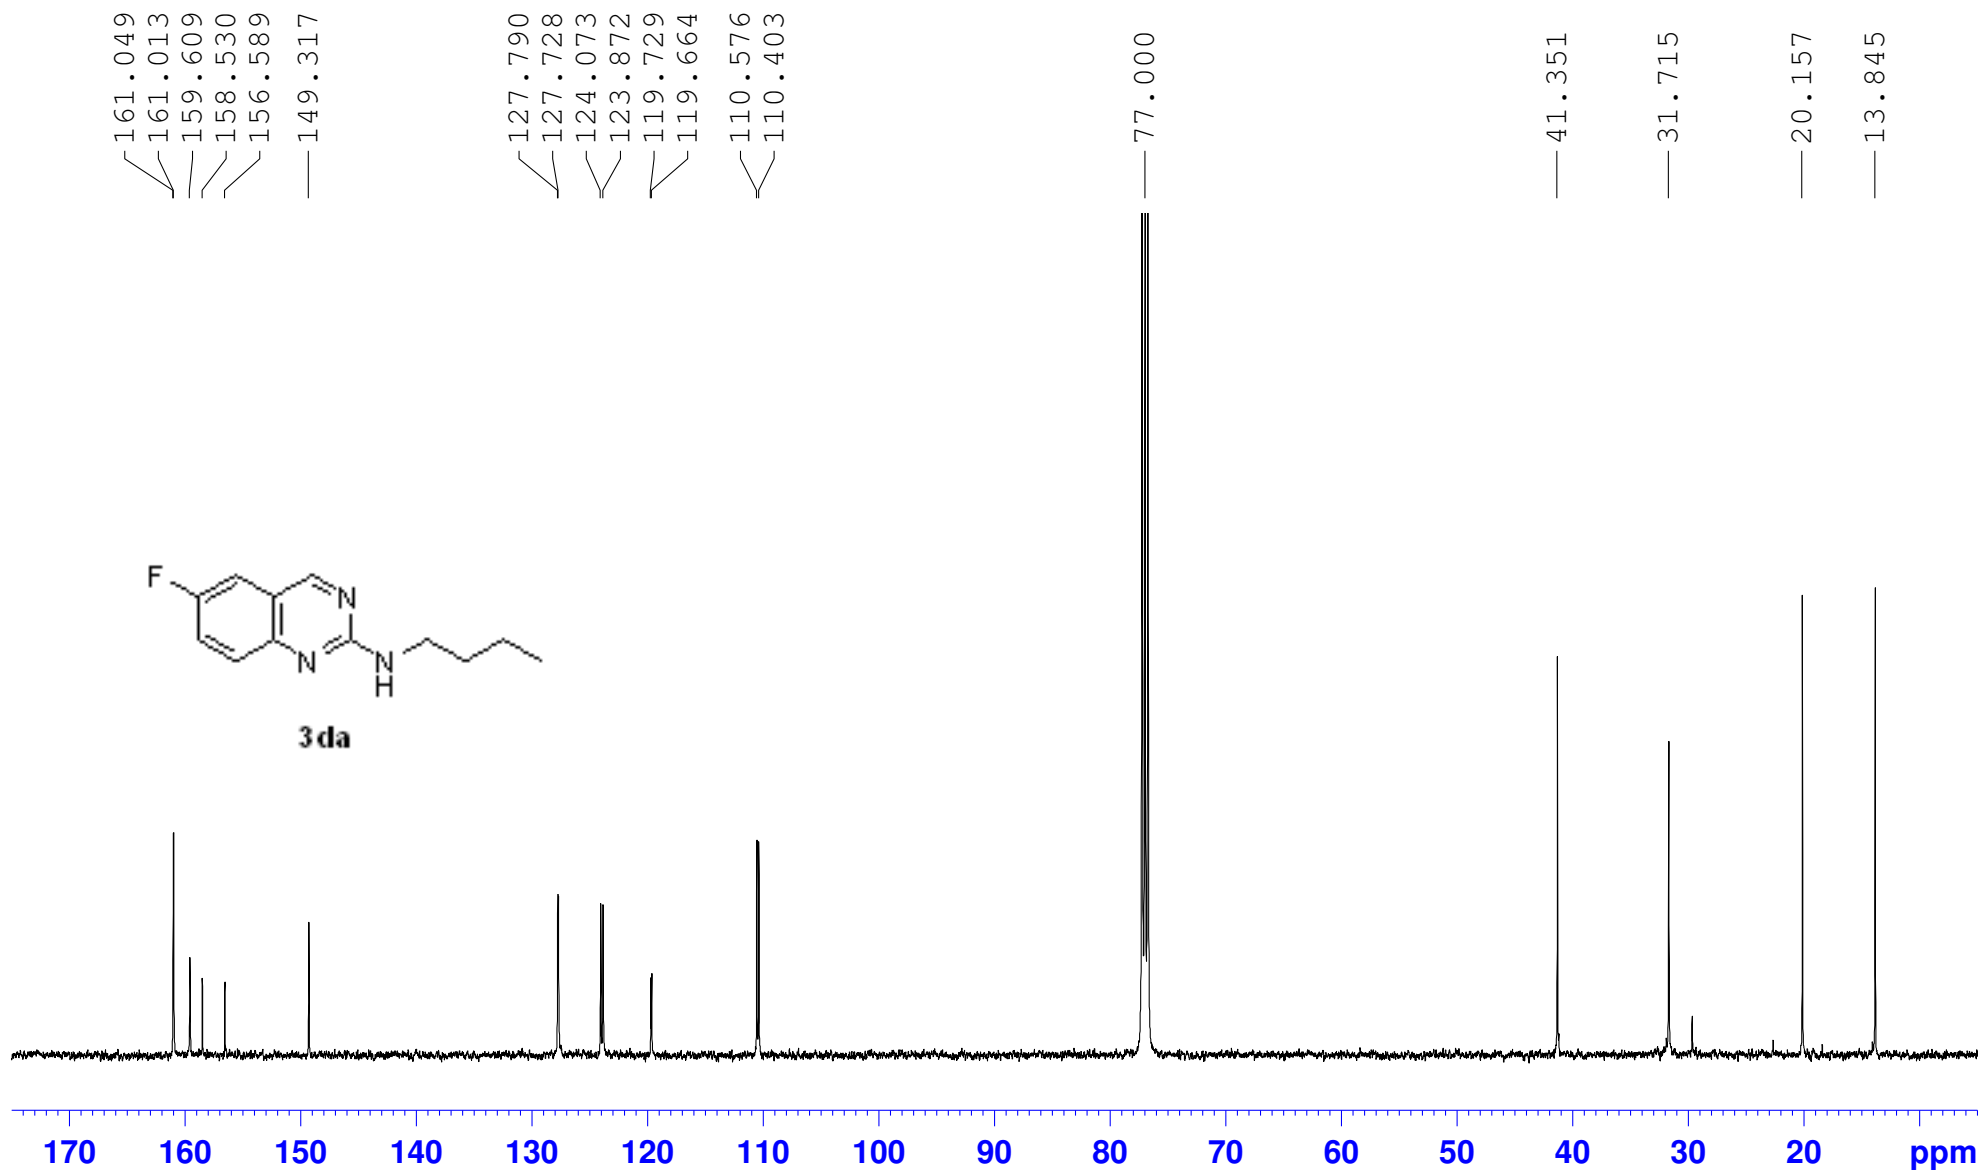

6-bromo-N-butylquinazolin-2-amine  
Proton CDCl<sub>3</sub>



8.867  
7.779  
7.774  
7.712  
7.708  
7.694  
7.689  
7.466  
7.448  
7.263  
5.319  
3.545  
3.531  
3.519  
3.505  
1.686  
1.665  
1.650  
1.636  
1.621  
1.492  
1.477  
1.462  
1.447  
1.432  
1.418  
0.987  
0.972  
0.958  
0.000

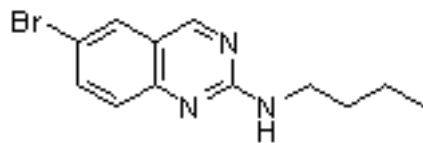

3ea

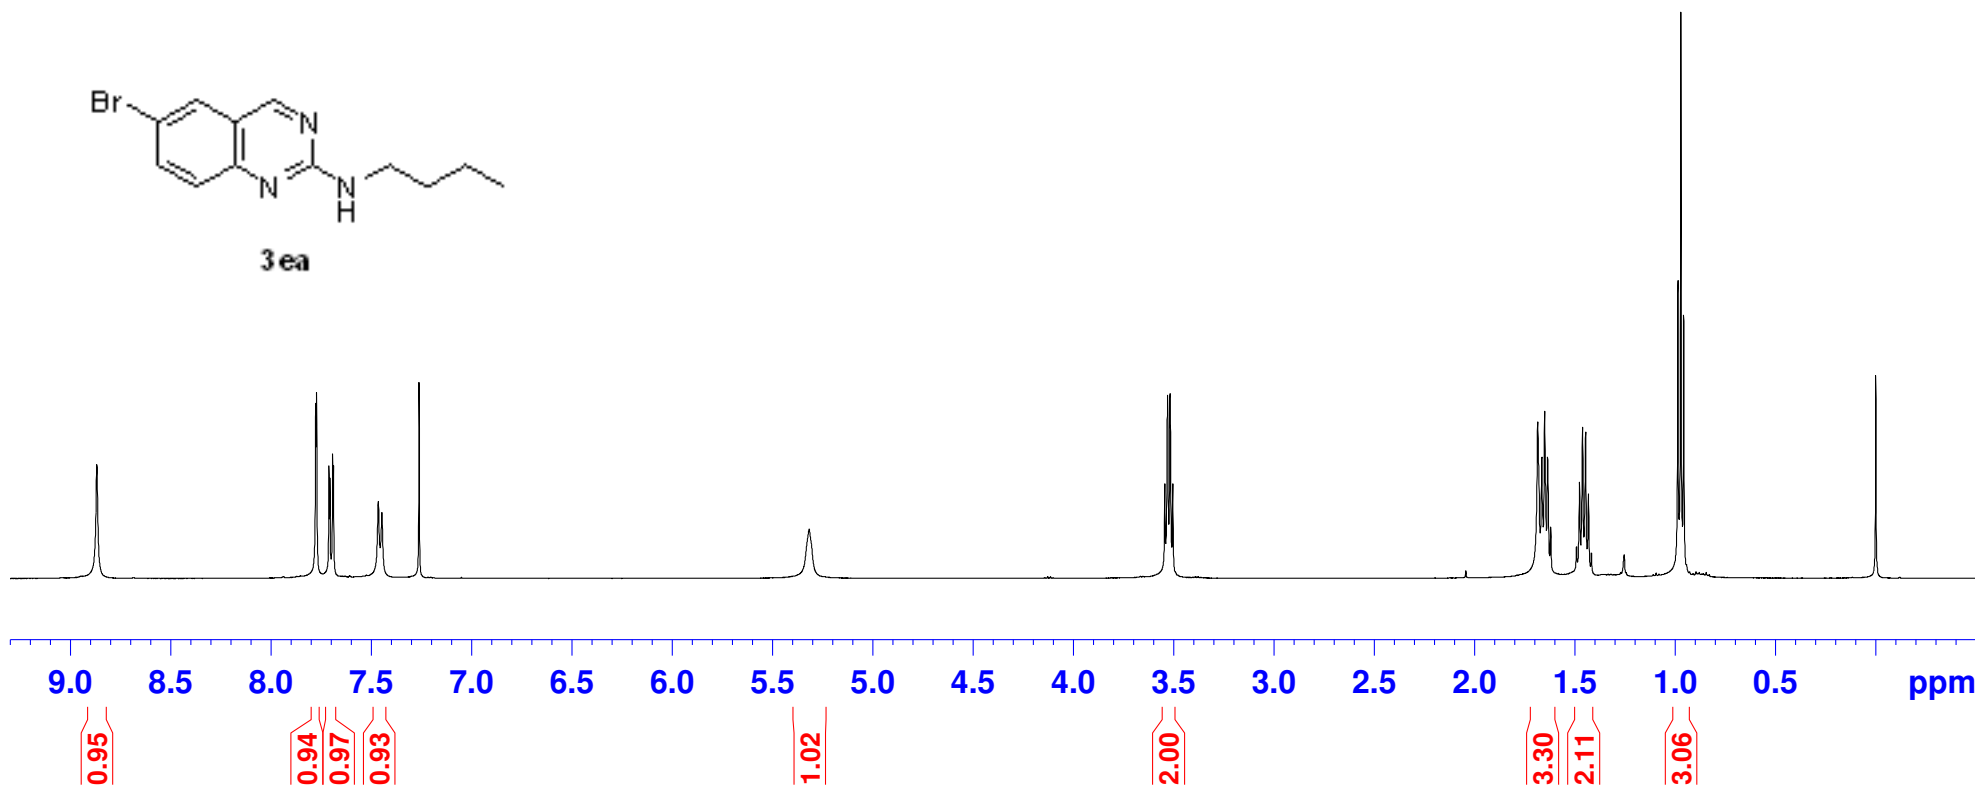

6-bromo-N-butylquinazolin-2-amine  
C13CPD CDC13

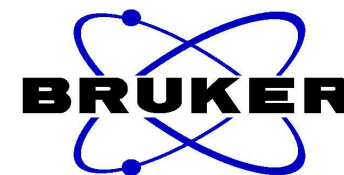

160.879  
159.858  
151.175  
137.251  
129.515  
127.526  
121.117  
114.928

77.000

41.551

31.826

20.333

13.924

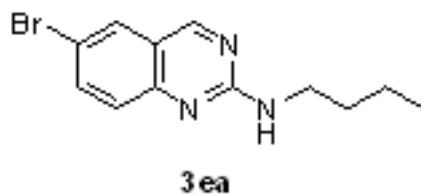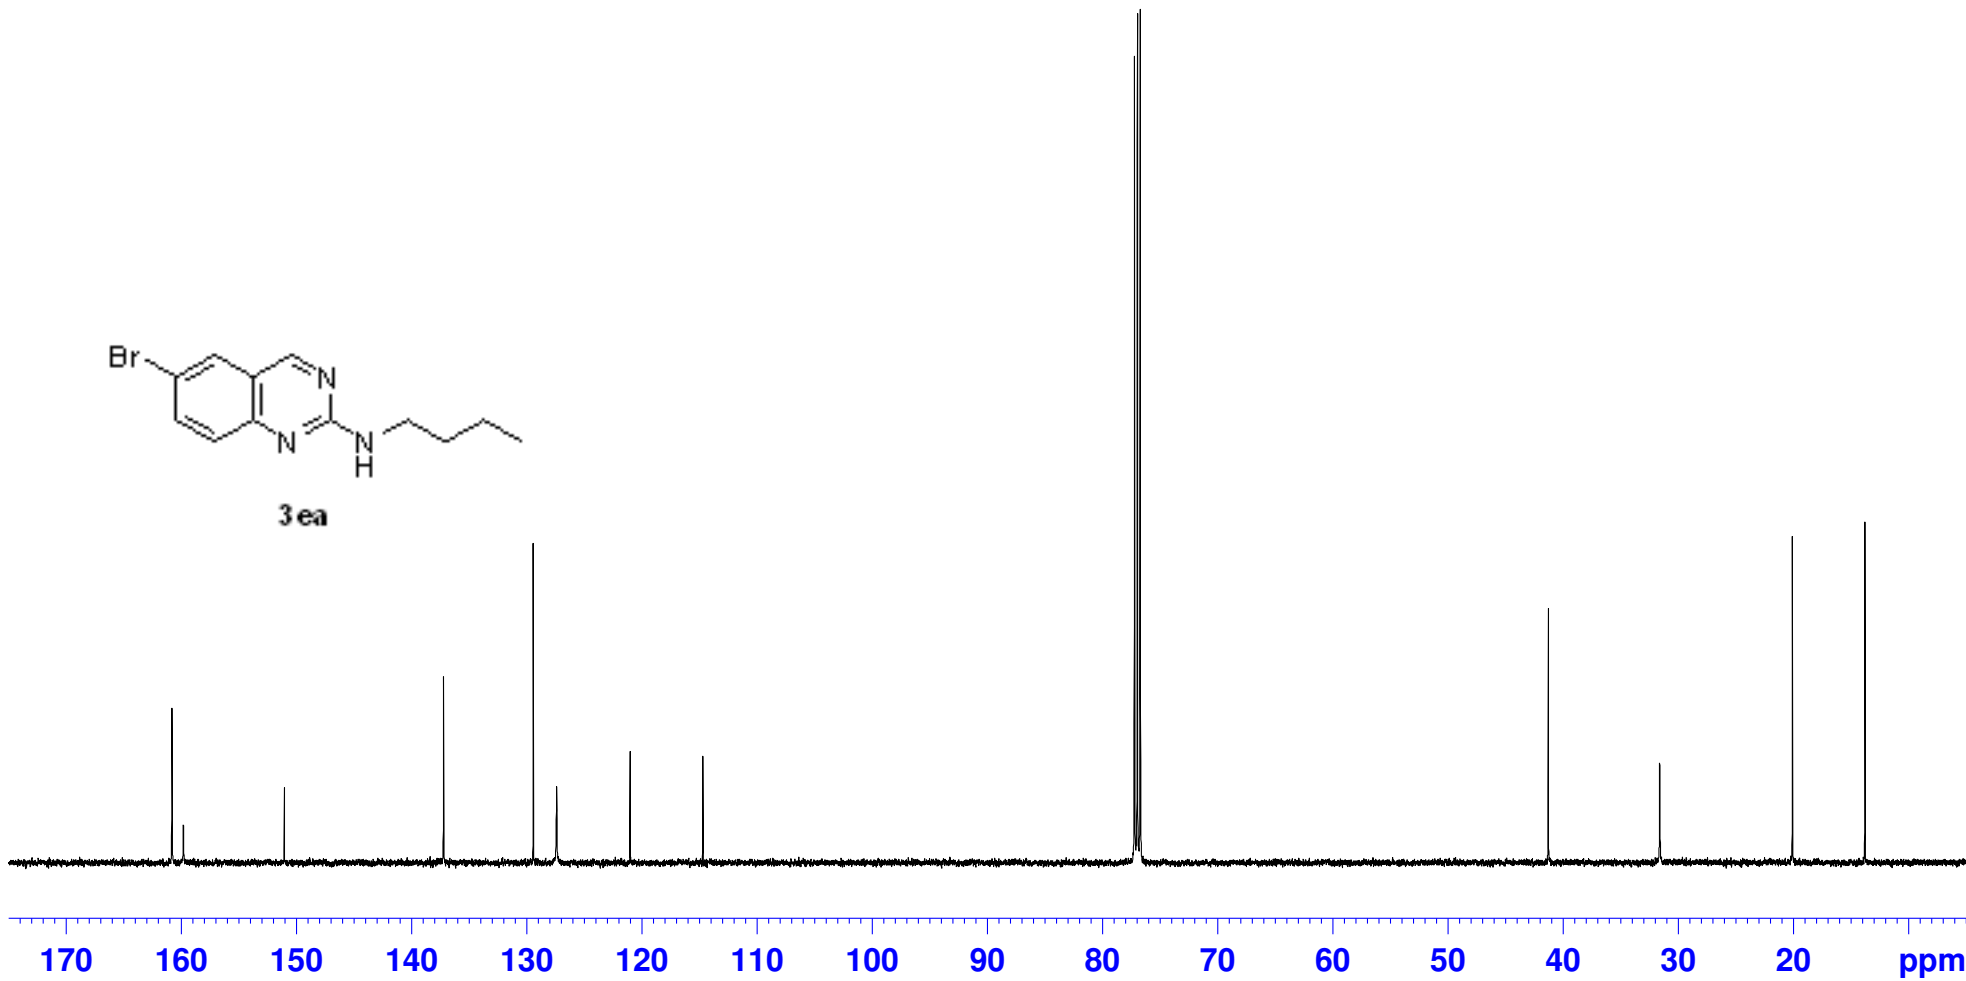

N-butyl-4-phenylnaphthalen-2-amine  
Proton CDCl<sub>3</sub>

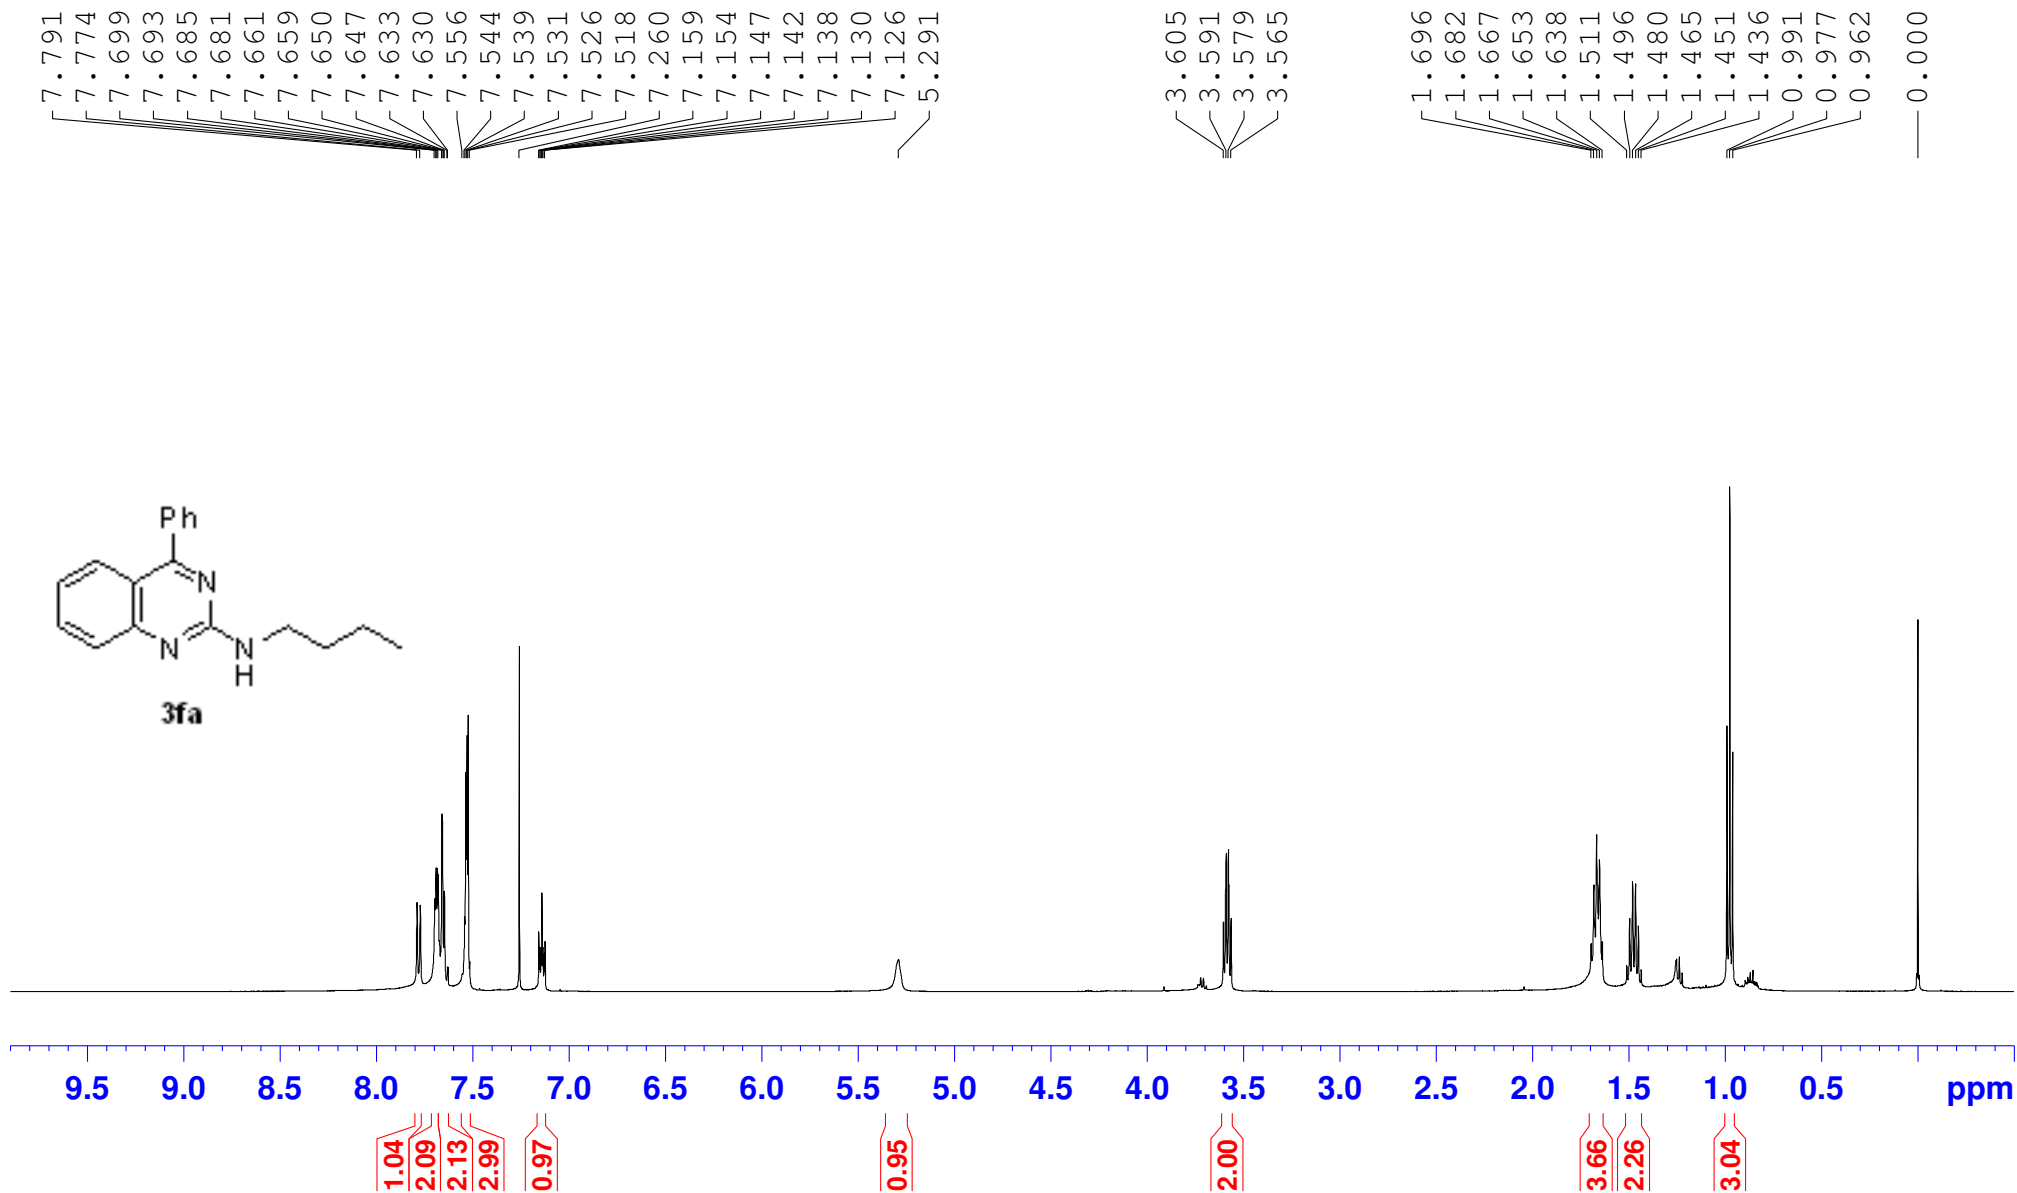



N-butyl-4-phenylquinazolin-2-amine  
C13CPD CDCl3



— 169.867  
— 159.110  
— 153.377  
137.478  
133.636  
129.559  
129.442  
128.376  
127.430  
126.071  
122.111  
118.387

— 77.000

— 41.281

— 31.798

— 20.142

— 13.858

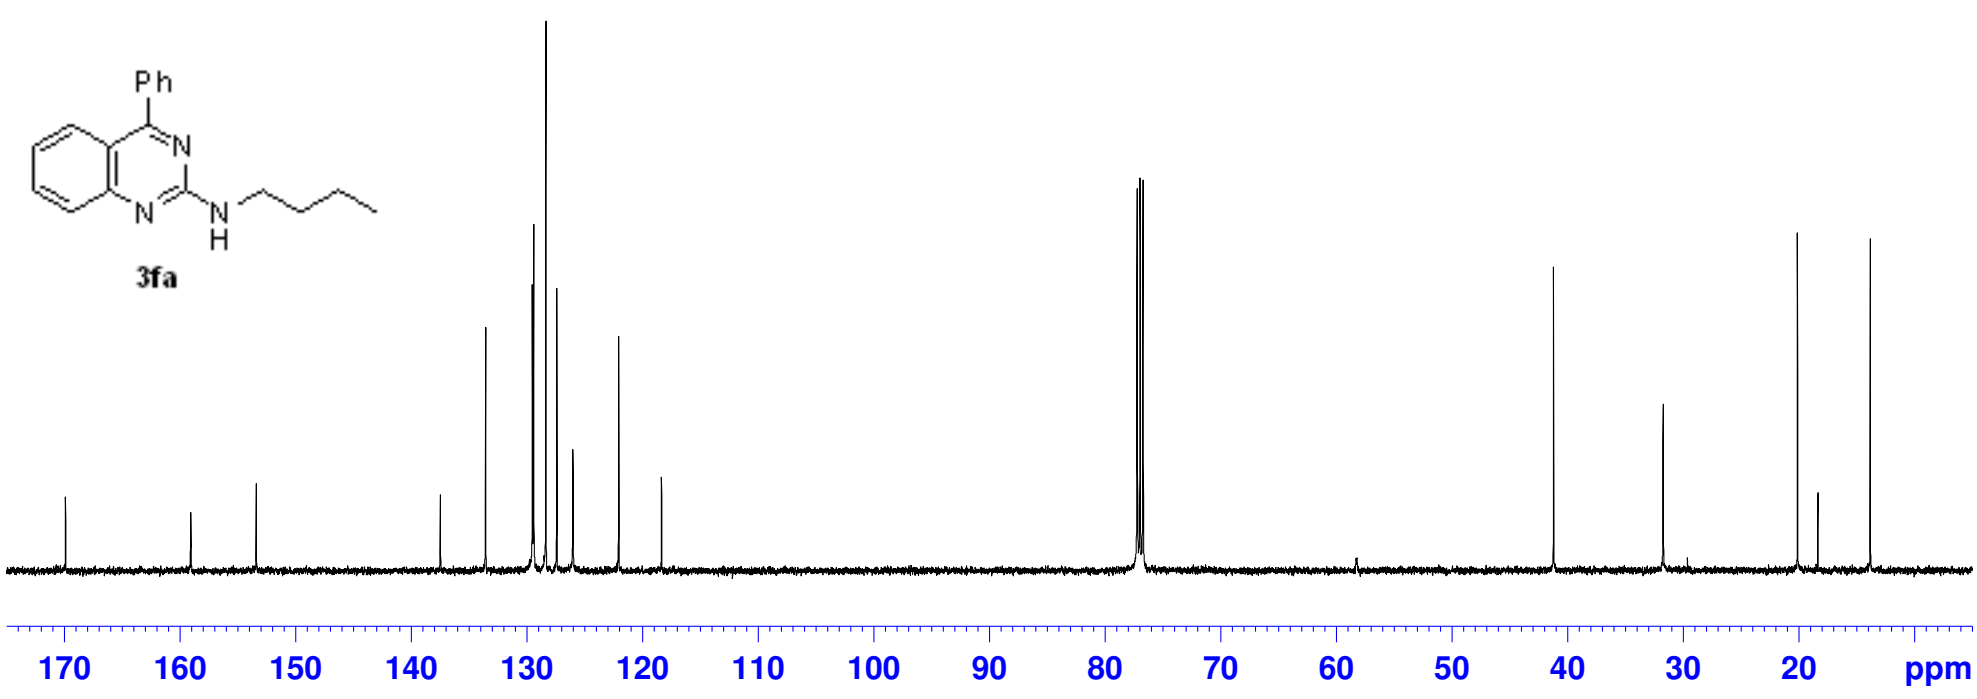

N-butylpyrimidin-2-amine  
Proton CDCl<sub>3</sub>

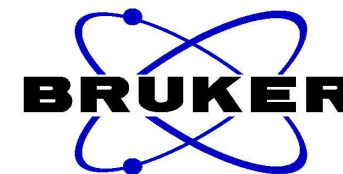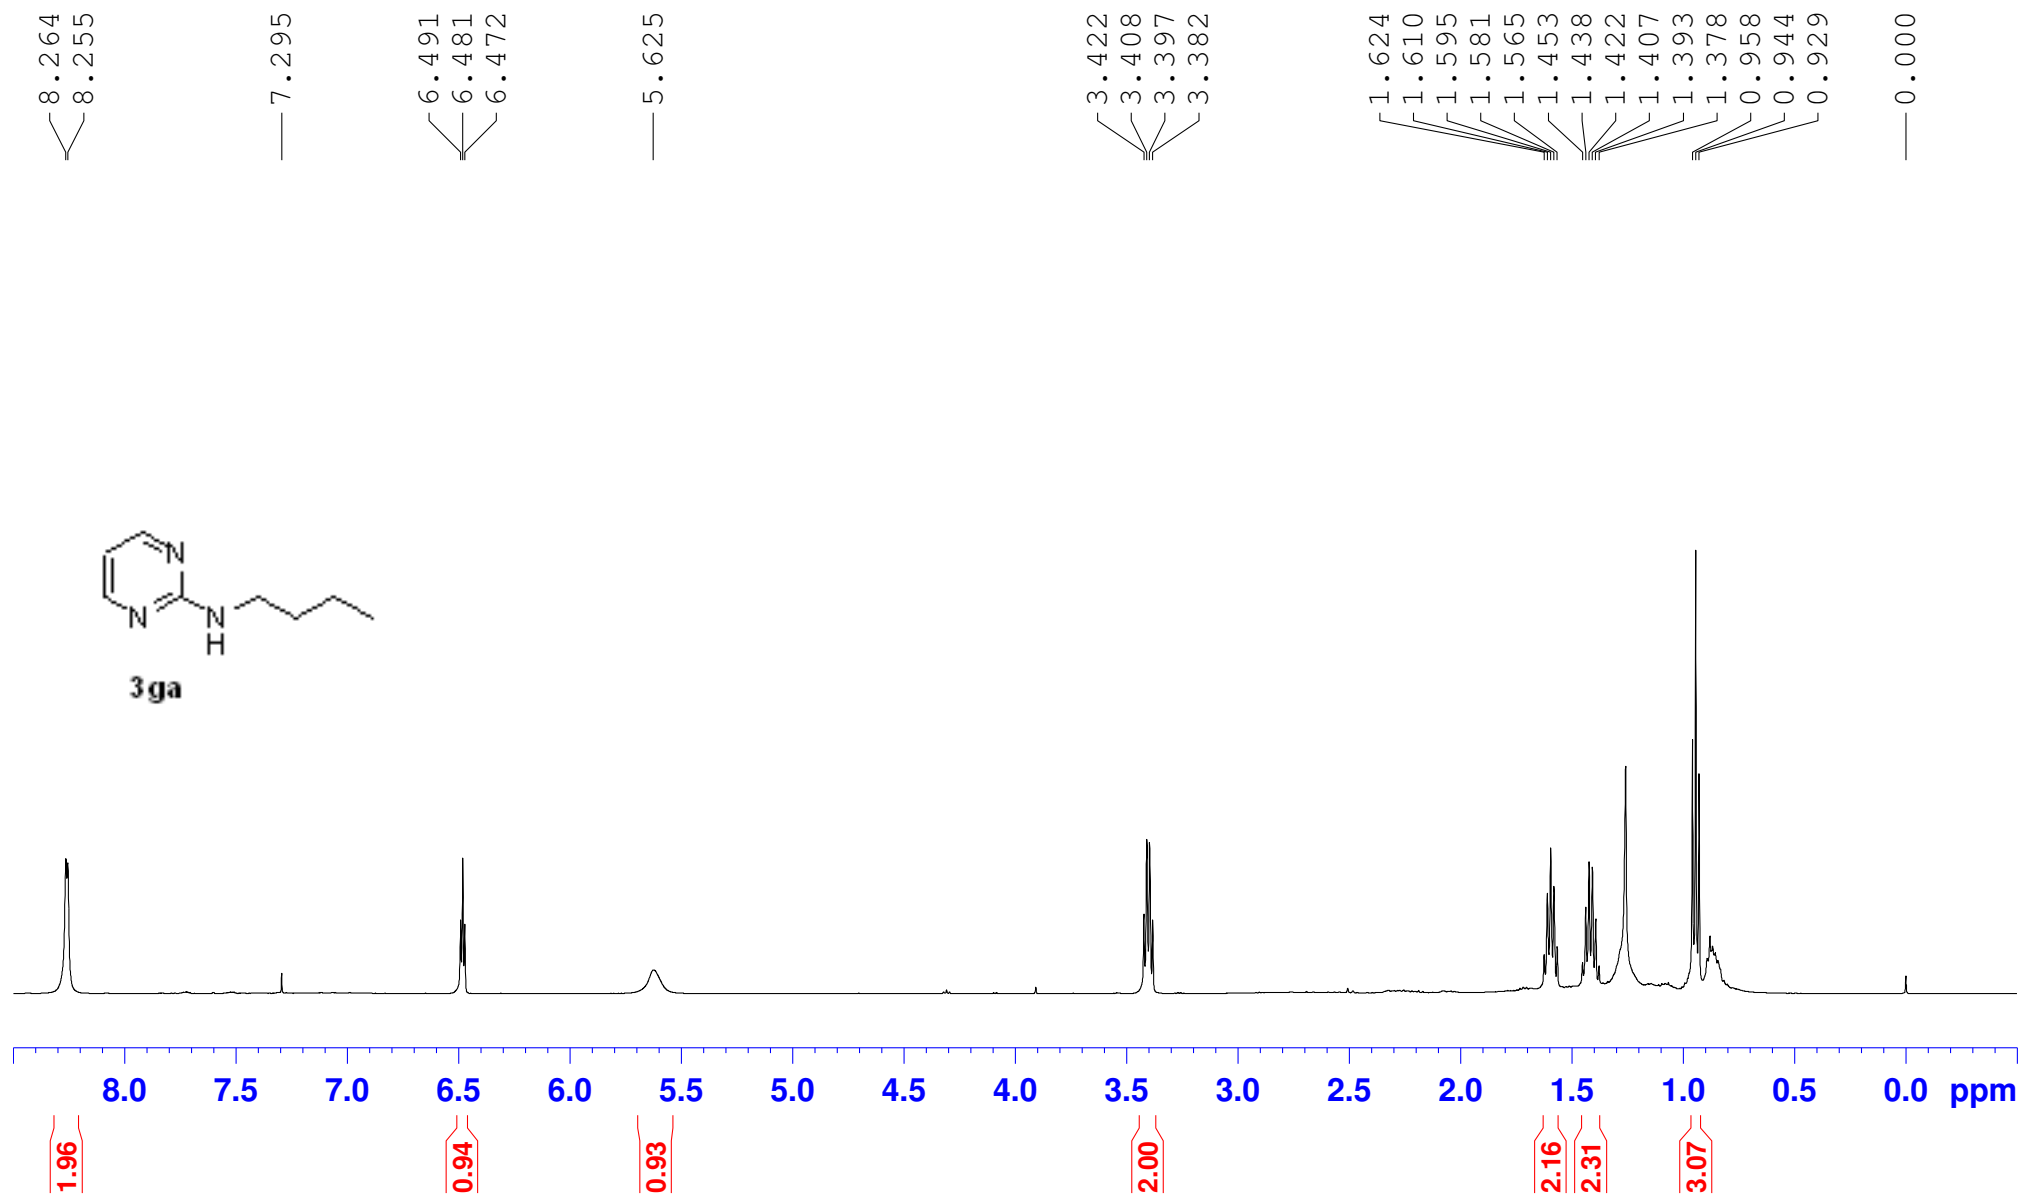

N-butylpyrimidin-2-amine  
C13CPD CDCl3



— 162.460  
— 158.027

— 110.153

— 77.000

— 41.069

— 31.630

— 20.079

— 13.703

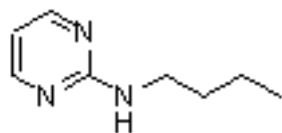

**3ga**

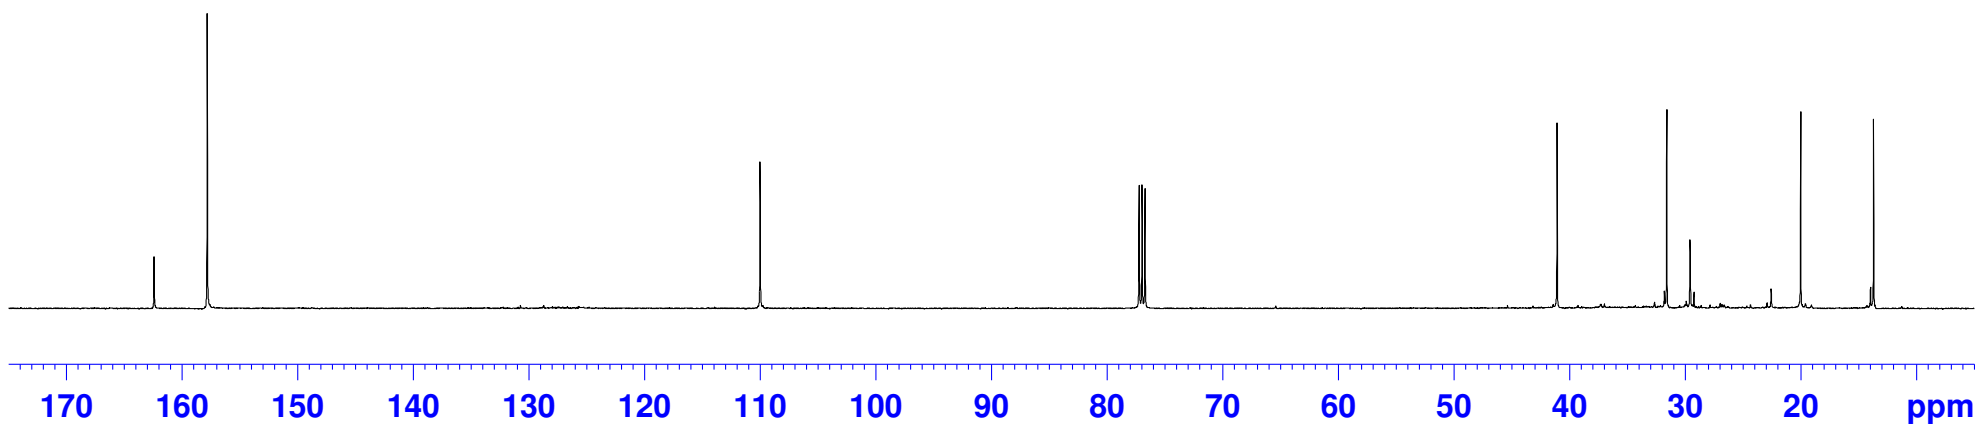

N-butyl-5-phenylpyrimidin-2-amine  
Proton CDCl<sub>3</sub>

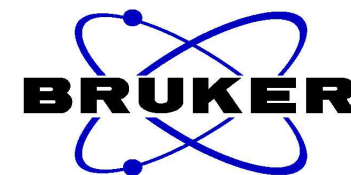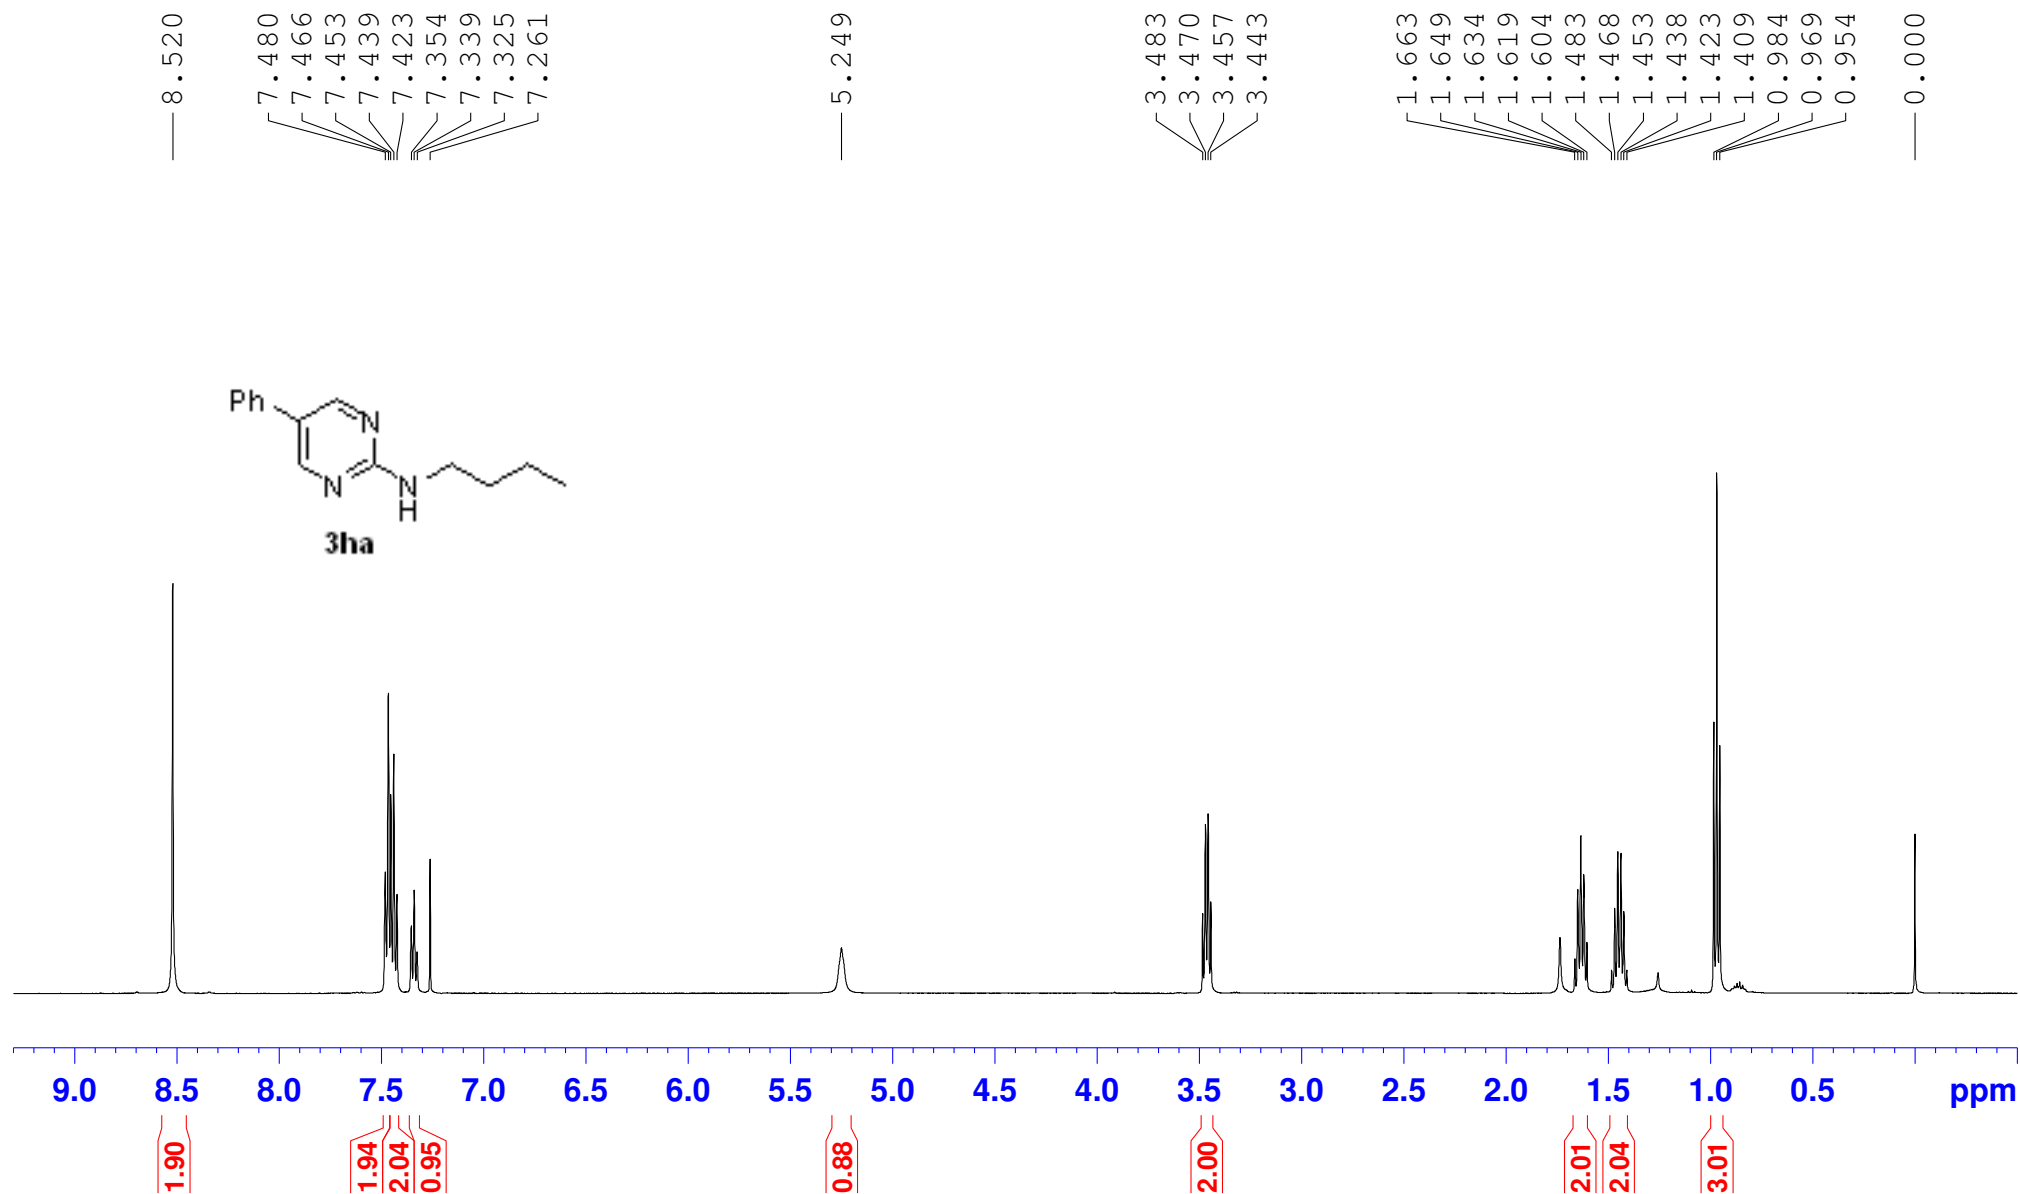

N-butyl-5-phenylpyrimidin-2-amine  
C13CPD CDCl<sub>3</sub>



— 161.858

— 156.290

— 135.732

— 129.122

— 127.249

— 125.791

— 123.554

— 77.000

— 41.446

— 31.916

— 20.169

— 13.742

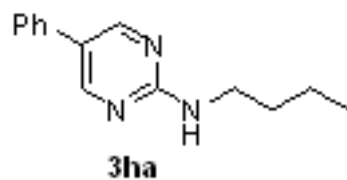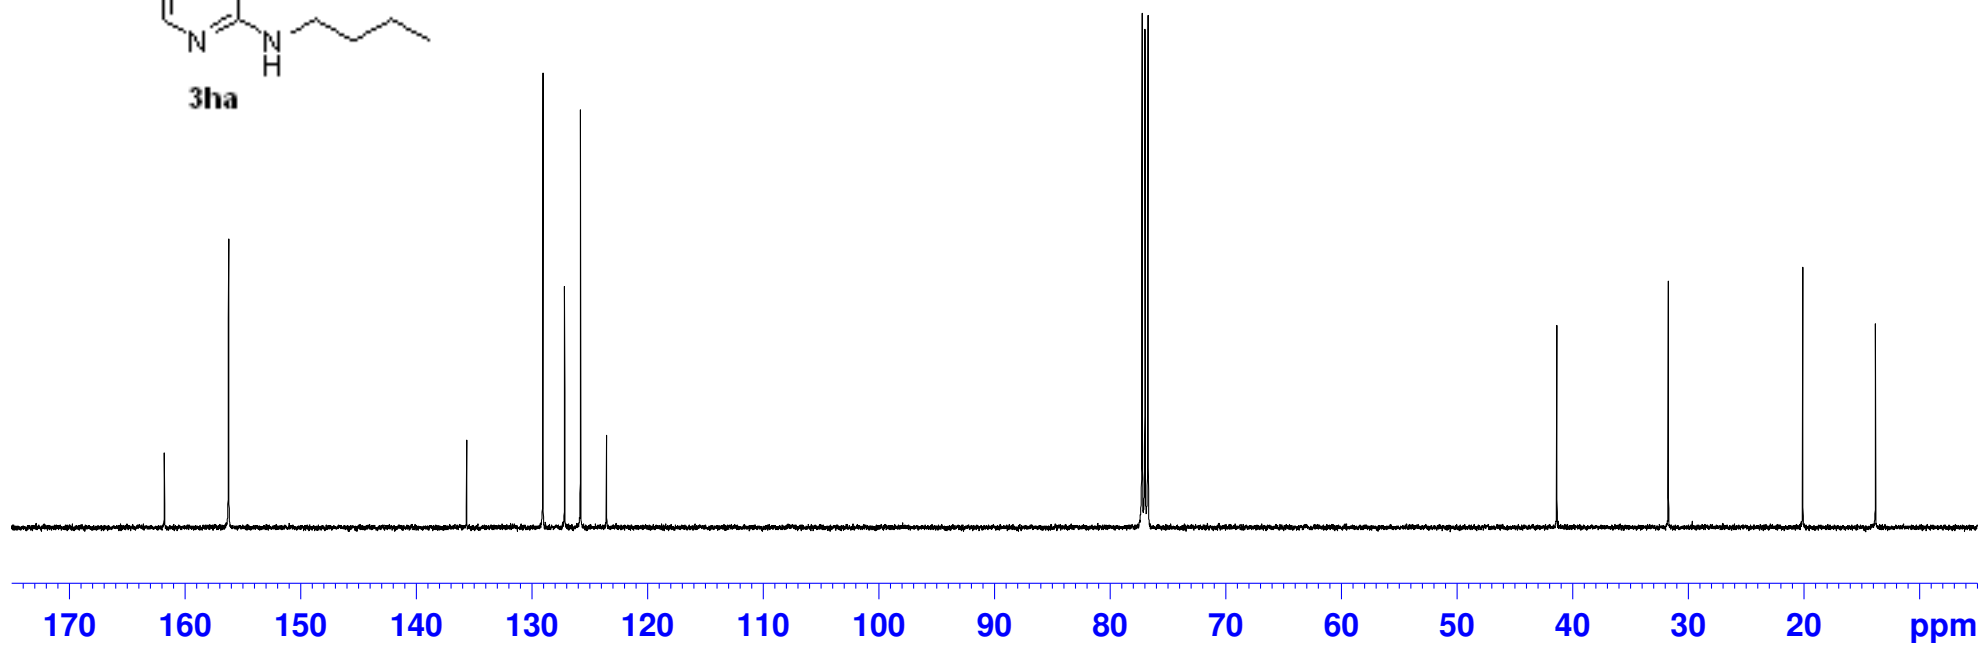

N-butyl-5-phenoxyimidin-2-amine  
Proton CDCl<sub>3</sub>



8.142  
7.322  
7.305  
7.290  
7.261  
7.072  
7.058  
7.044  
6.942  
6.926  
5.122  
3.423  
3.409  
3.396  
3.383  
1.641  
1.626  
1.612  
1.597  
1.582  
1.469  
1.454  
1.439  
1.424  
1.409  
1.395  
0.977  
0.962  
0.947  
0.000

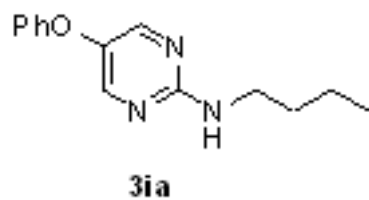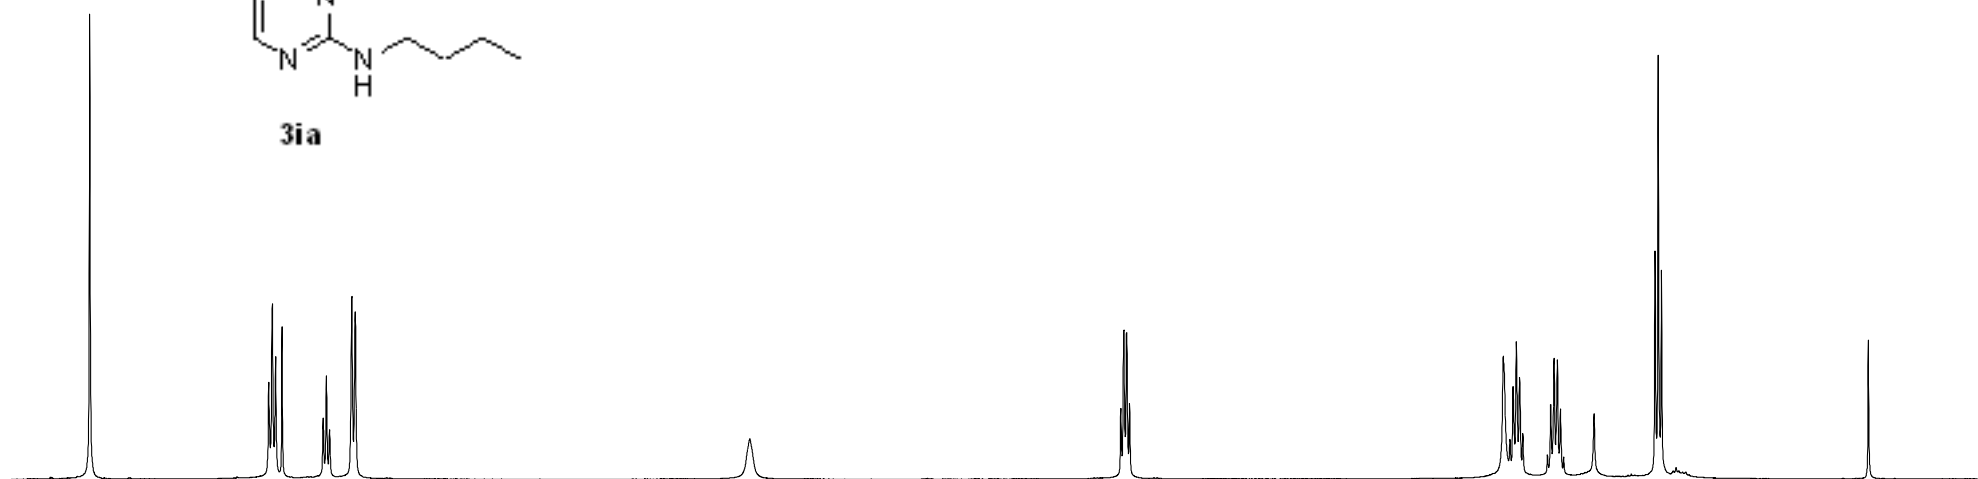

8.0 7.5 7.0 6.5 6.0 5.5 5.0 4.5 4.0 3.5 3.0 2.5 2.0 1.5 1.0 0.5 0.0 ppm  
1.77 1.96 0.98 1.90 0.91 2.00 2.21 2.16 3.04

N-butyl-5-phoxypyrimidin-2-amine  
C13CPD CDCl3



159.678  
158.511  
151.015  
142.600  
129.979  
122.893  
116.472

77.000

41.629

31.

20.

13.

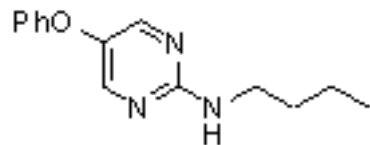

3ia

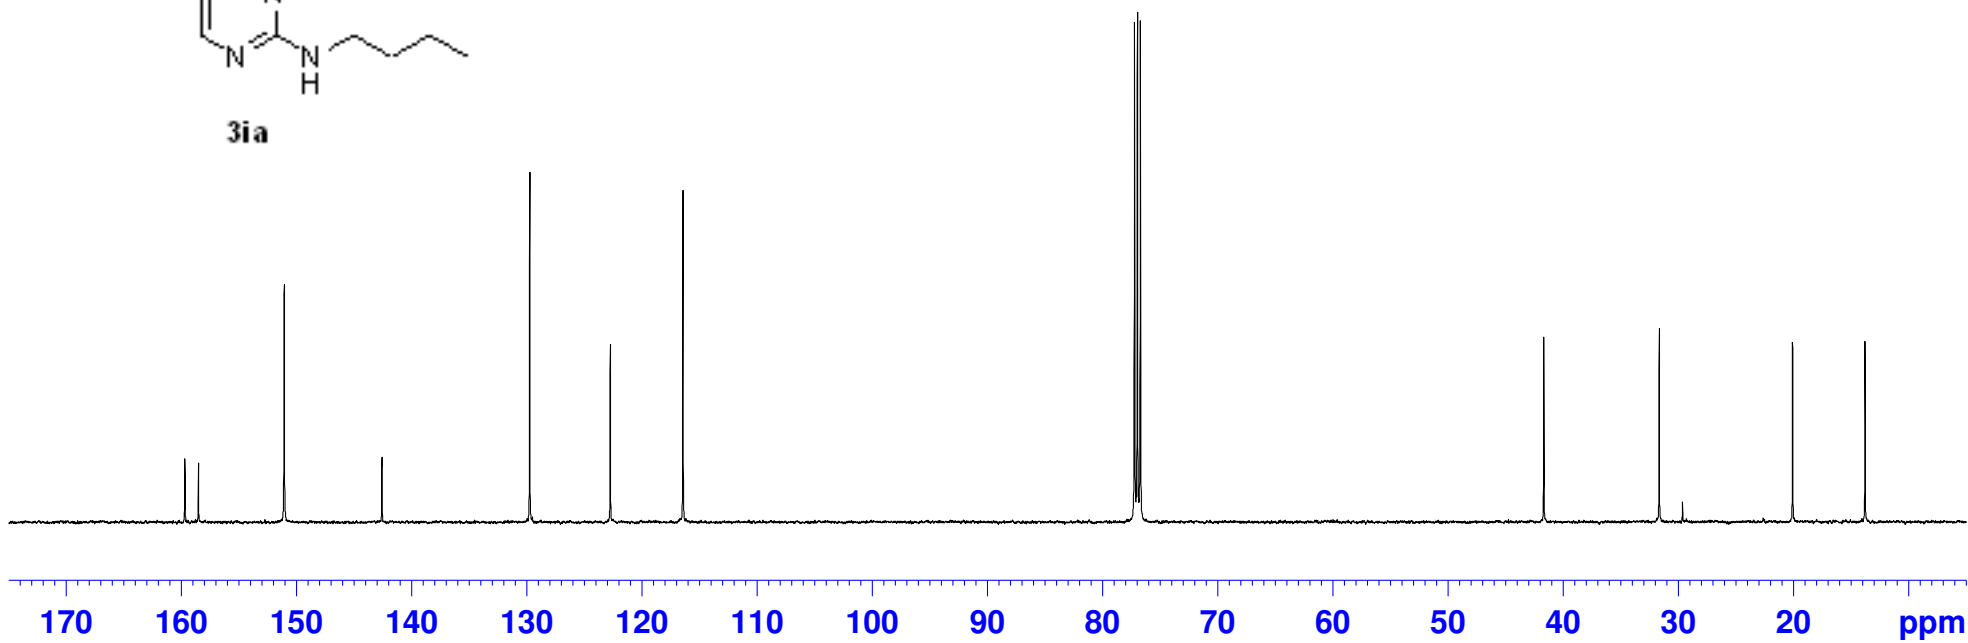

N-butyl-4,6-diphenylpyrimidin-2-amine  
Proton CDCl<sub>3</sub>

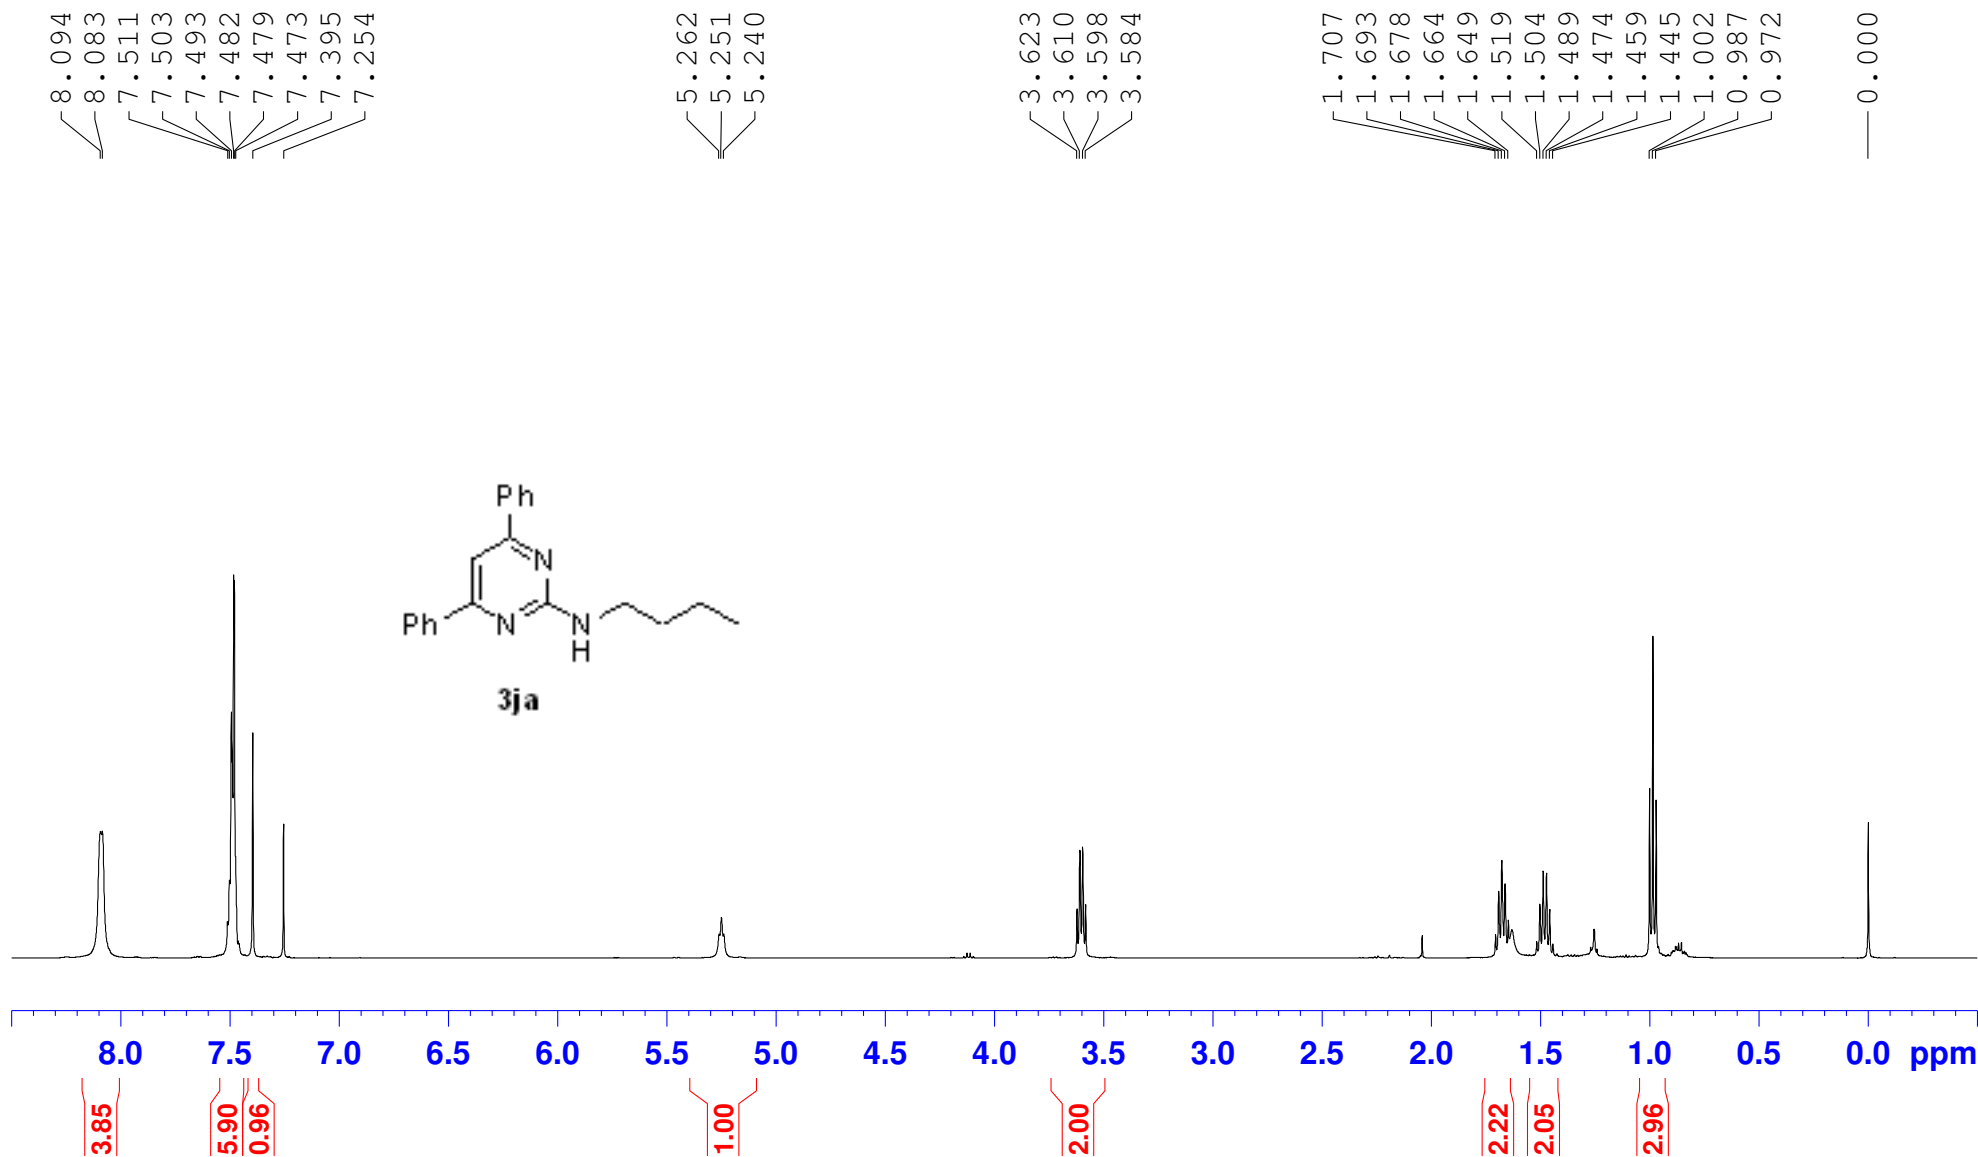



N-butyl-4,6-diphenylpyrimidin-2-amine  
C13CPD CDC13

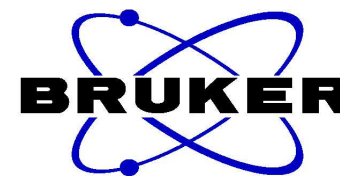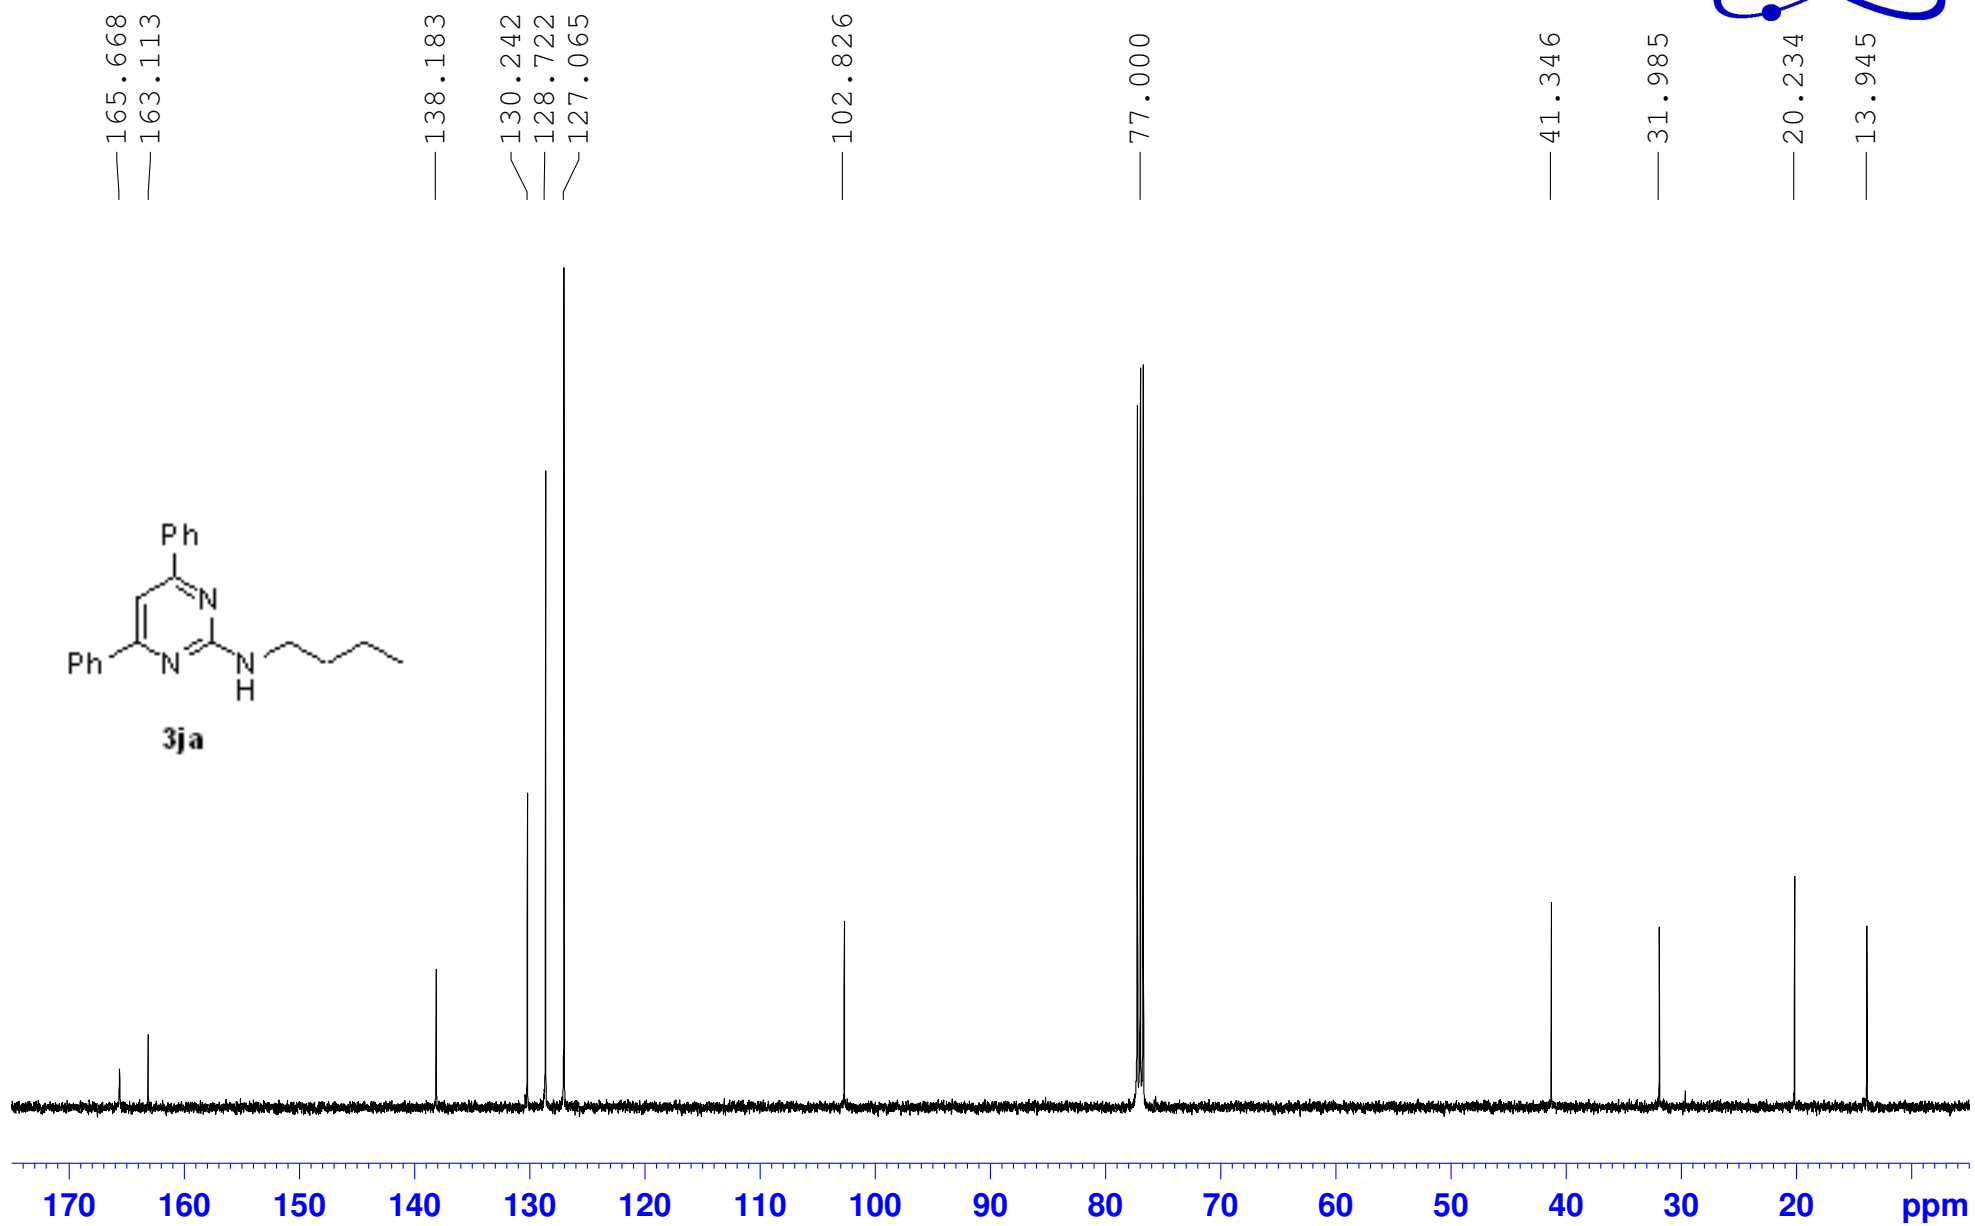

2-(butylamino)-6-phenylpyrimidin-4-ol  
Proton CDCl<sub>3</sub>

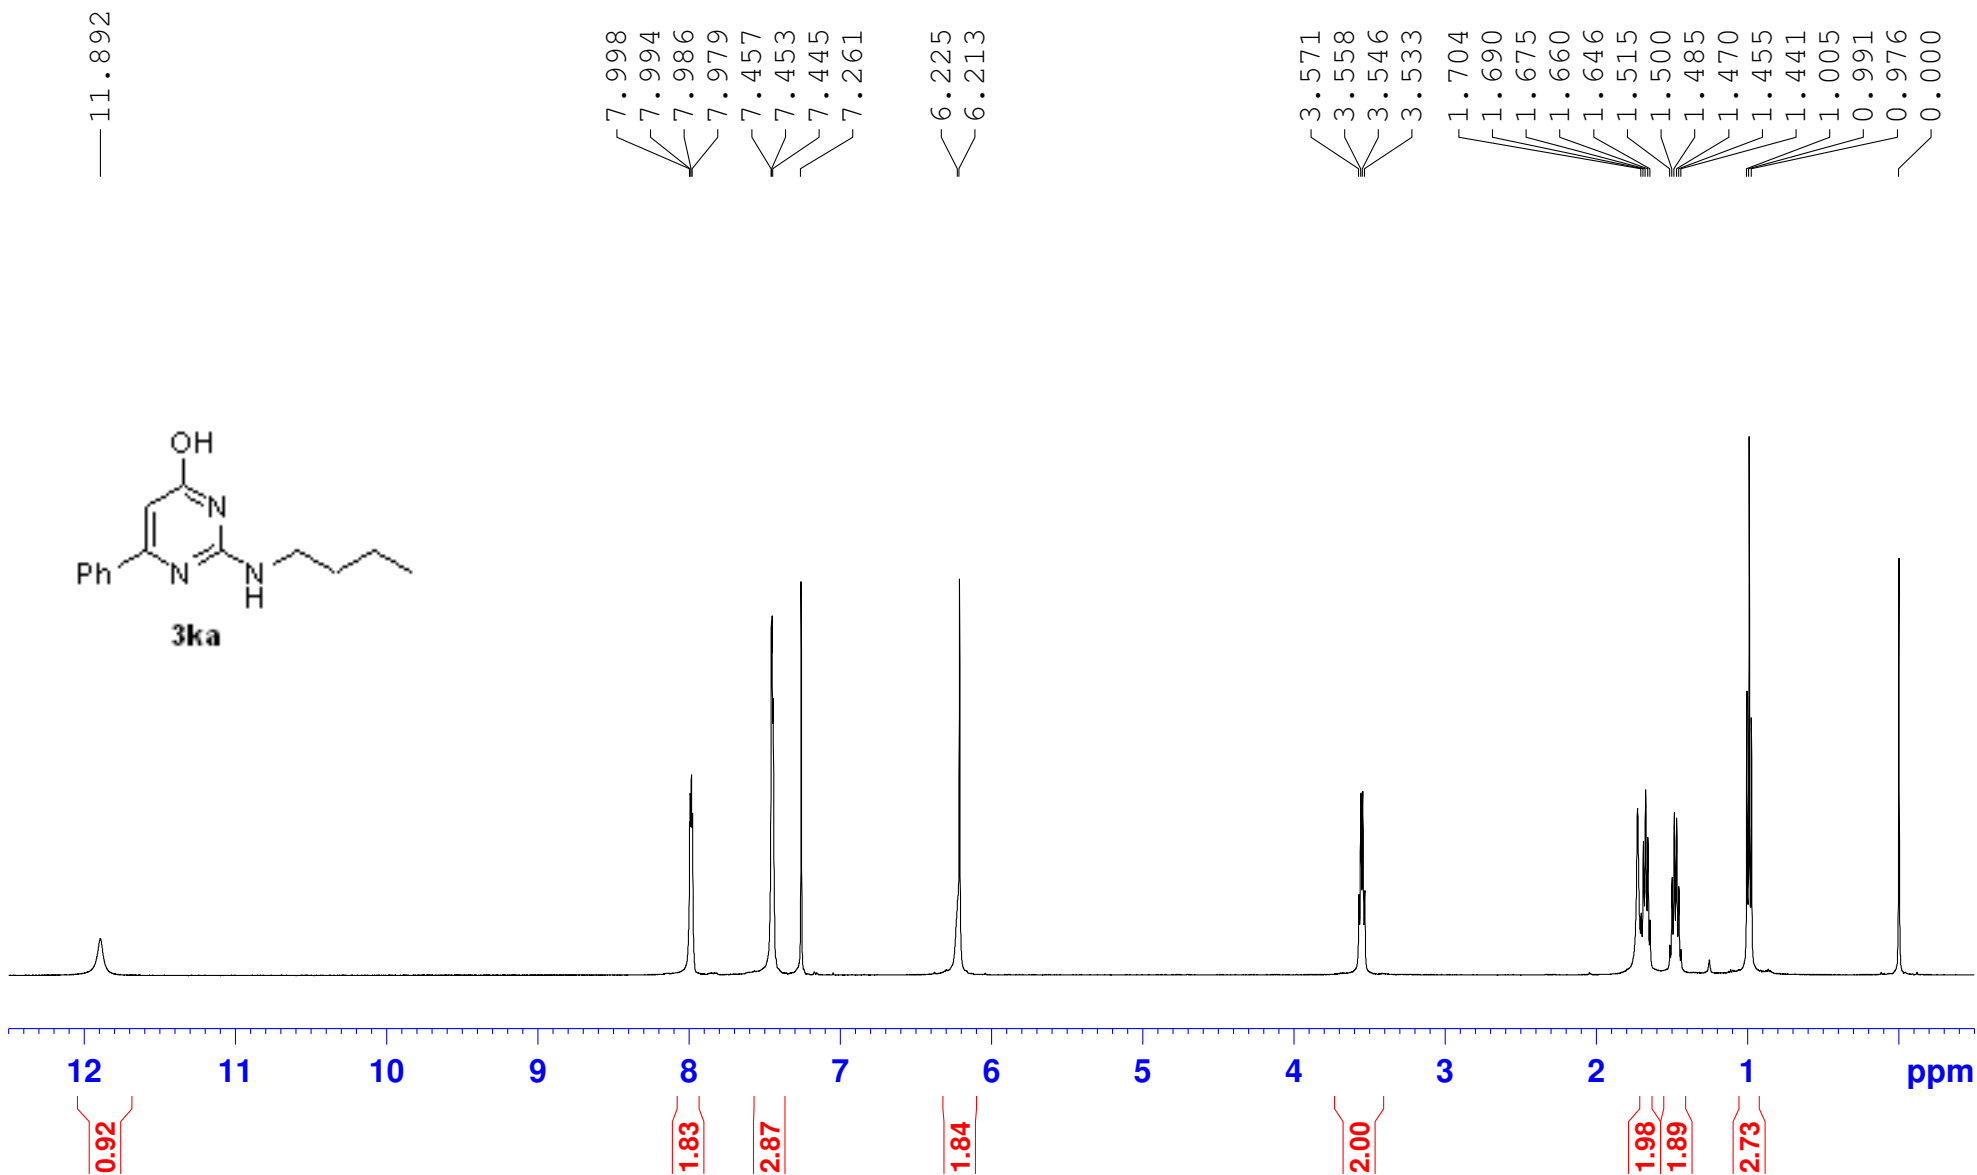

2-(butylamino)-6-phenylpyrimidin-4-ol  
C13CPD CDC13

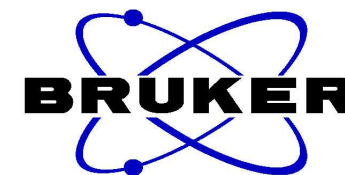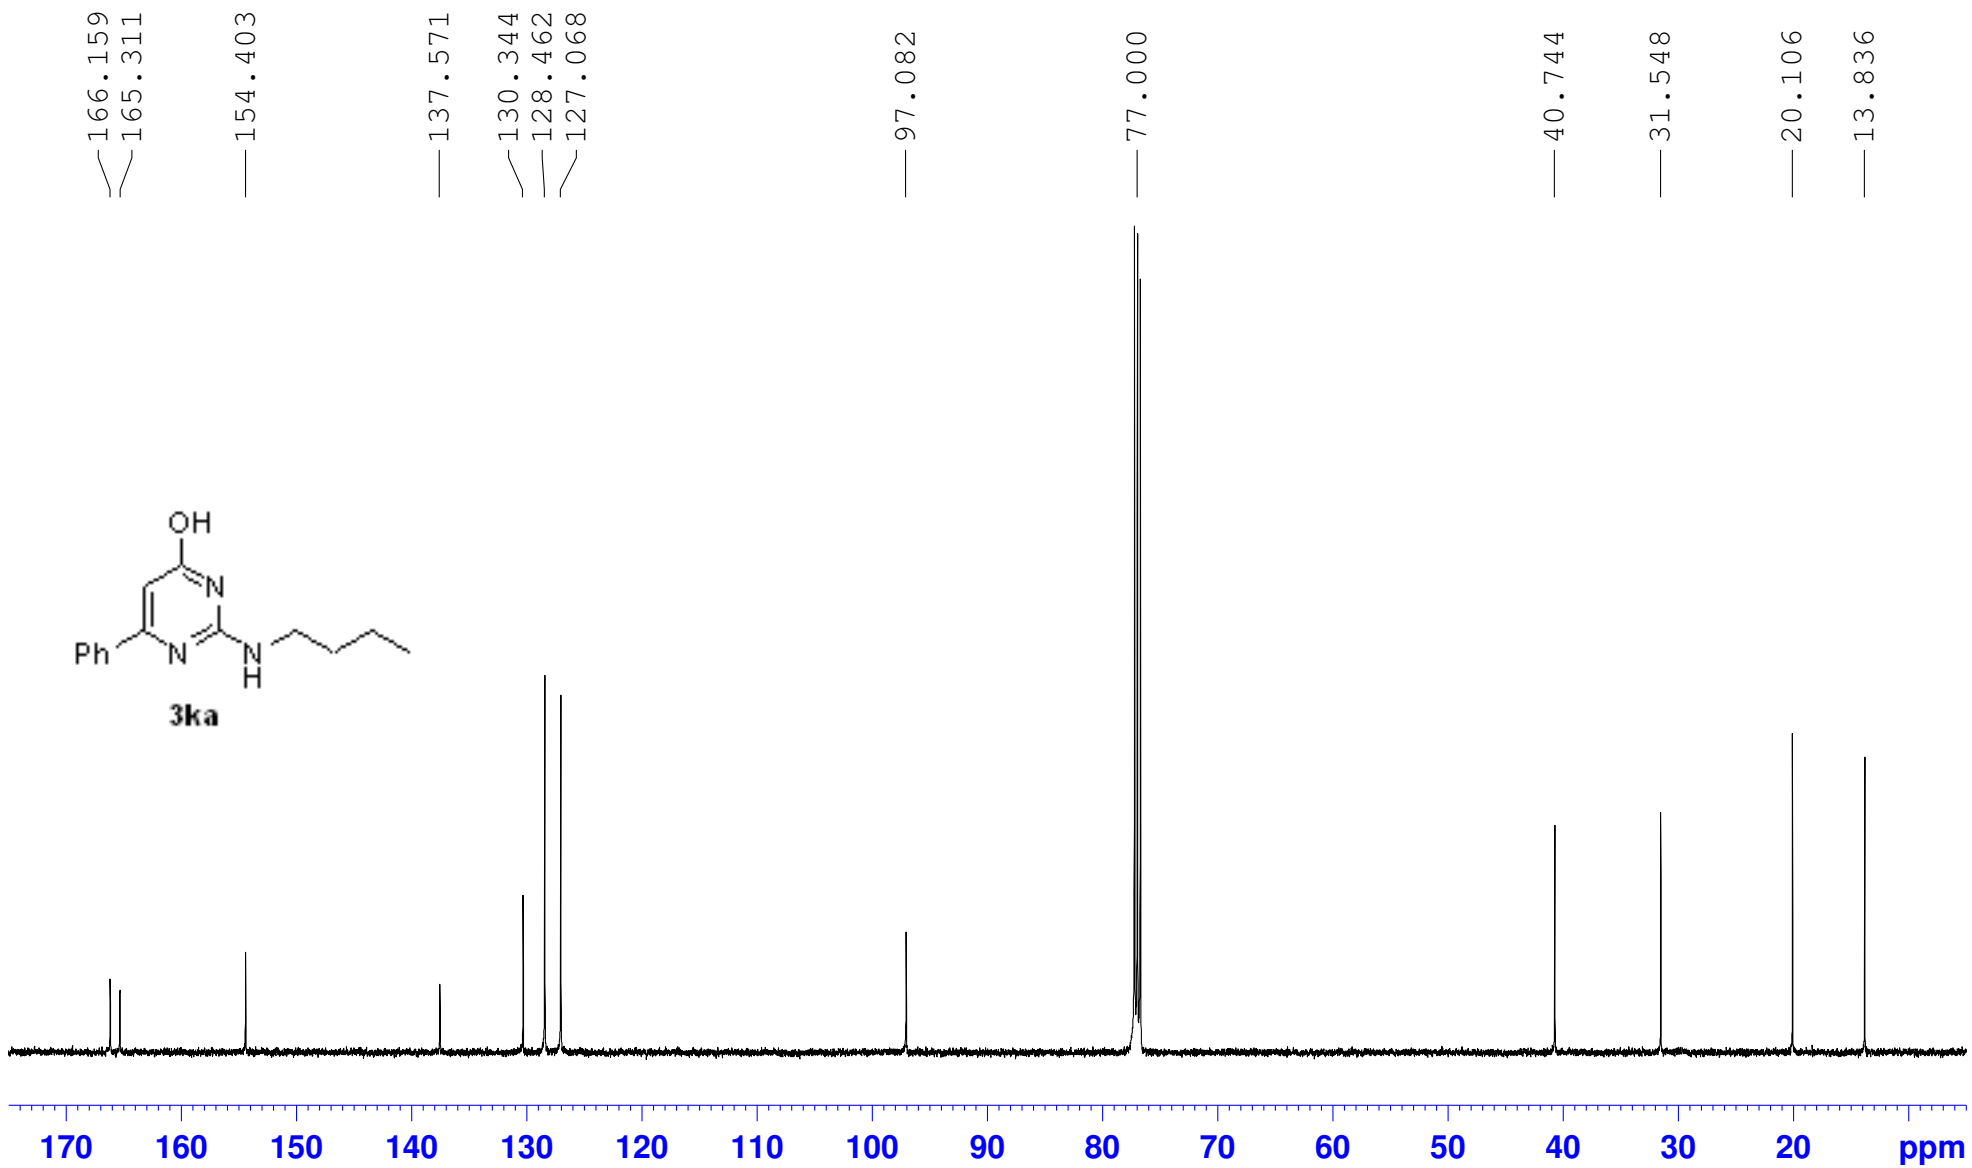

N2,N4-dibenzylquinazoline-2,4-diamine  
Proton DMSO-d6

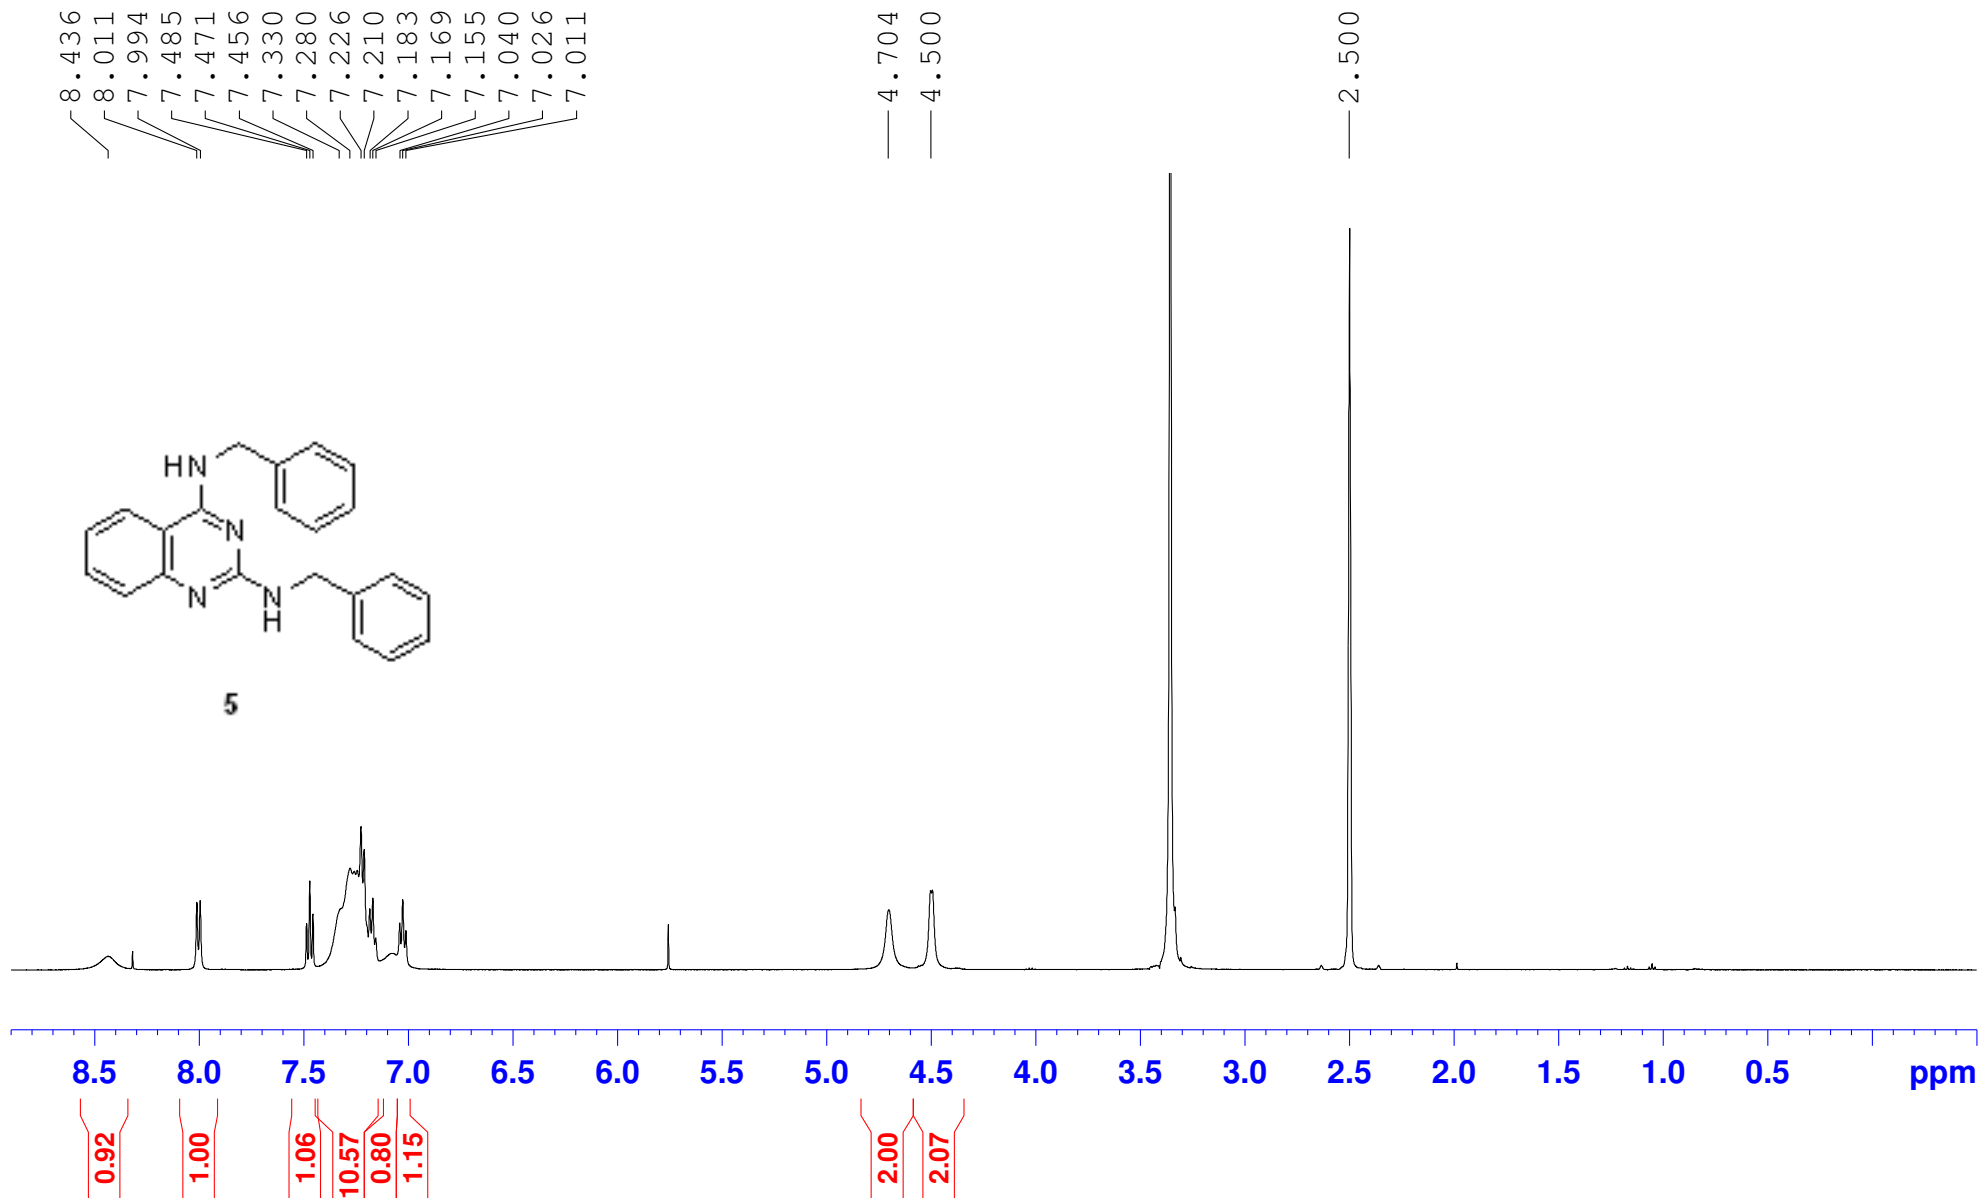

N2,N4-dibenzylquinazoline-2,4-diamine  
C13CPD DMSO-d6

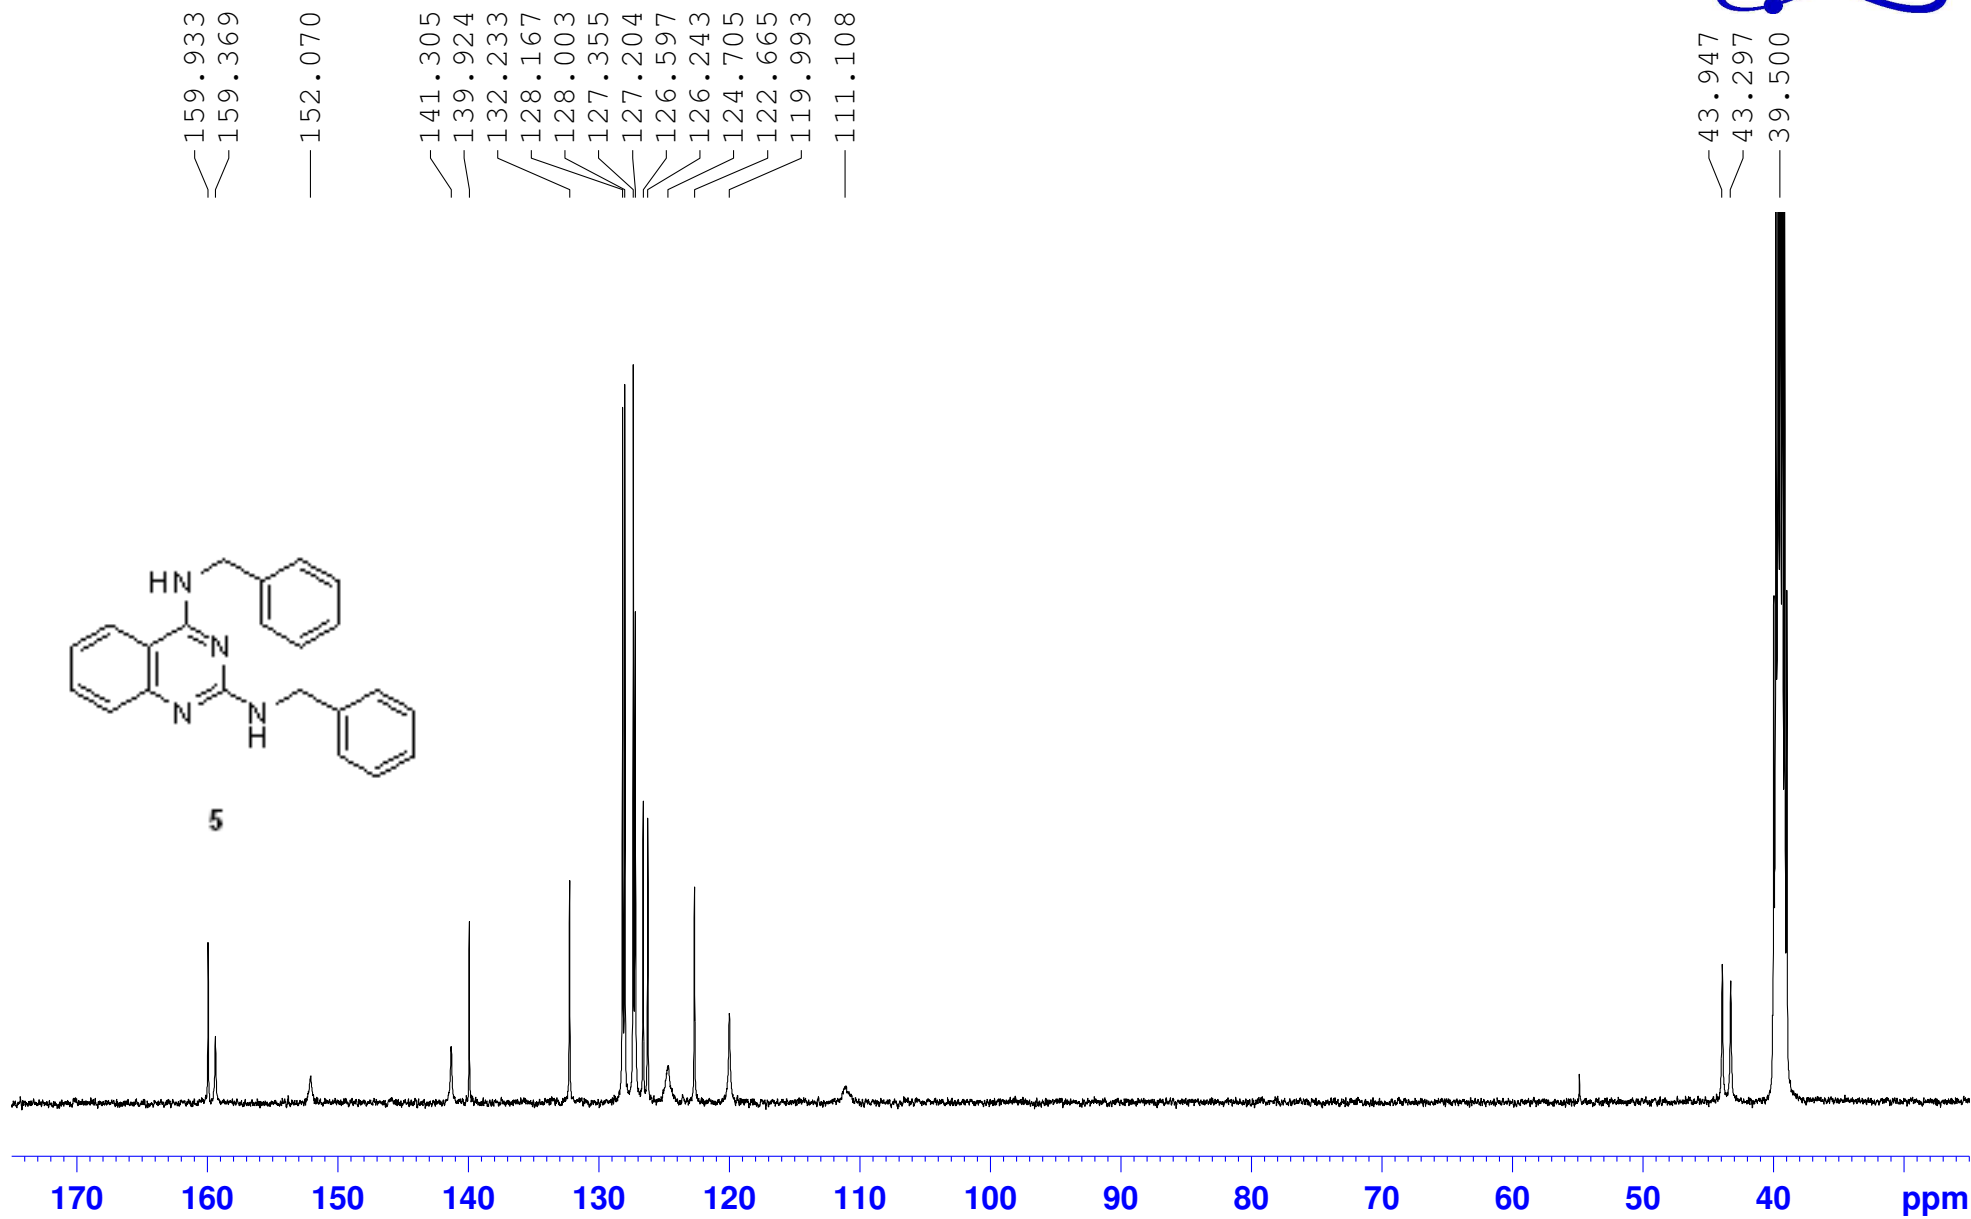

Supplement: c2nj41021d.pdf [file c2nj41021d.pdf]
